# Supplementary material for: A concise approach to polysubstituted oxazoles from N-acyl-2-bromo enamides via a copper(i)/amino acid-catalyzed intramolecular C–O bond formation
Source: Royal Society of Chemistry journal article supplement (doi:10.1039/c4ob00309h), 2014-01-01

## Electronic Supplementary Information

### A Concise Approach to Polysubstituted Oxazoles from *N*-Acyl-2-bromo Enamides via a Copper(I)/Amino Acid-catalyzed Intramolecular C–O Bond Formation

Bingjie Liu, Yueteng Zhang, Gang Huang, Xinting Zhang, Pengfei Niu, Jie Wu, Wenquan Yu\* and  
Junbiao Chang\*

*College of Chemistry and Molecular Engineering, Zhengzhou University, 100 Science Avenue,  
Zhengzhou 450001, P. R. China*

*E-mail: changjunbiao@zzu.edu.cn; wenquan\_yu@zzu.edu.cn*

#### CONTENTS:

1. <sup>1</sup>H NMR and <sup>13</sup>C NMR spectra of substrates **2** S2
2. <sup>1</sup>H NMR and <sup>13</sup>C NMR spectra of oxazoles **1** S24
3. X-ray structure of oxazole **1g** S46

# 1. <sup>1</sup>H NMR and <sup>13</sup>C NMR spectra of substrates 2

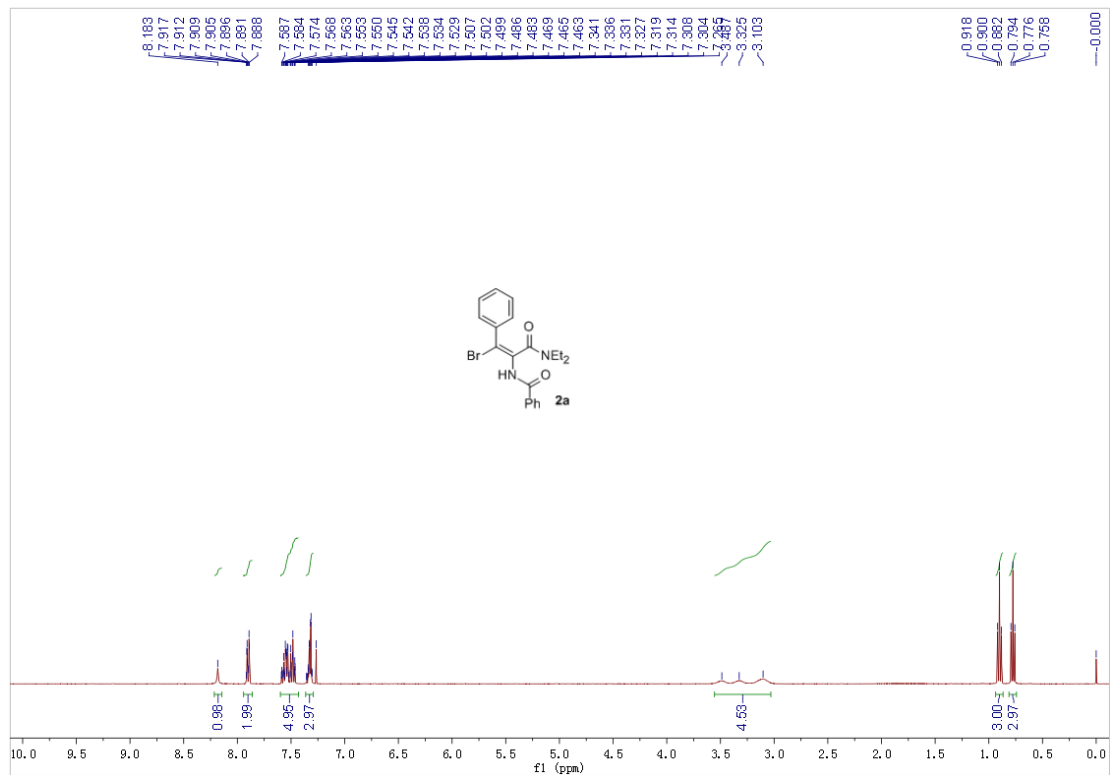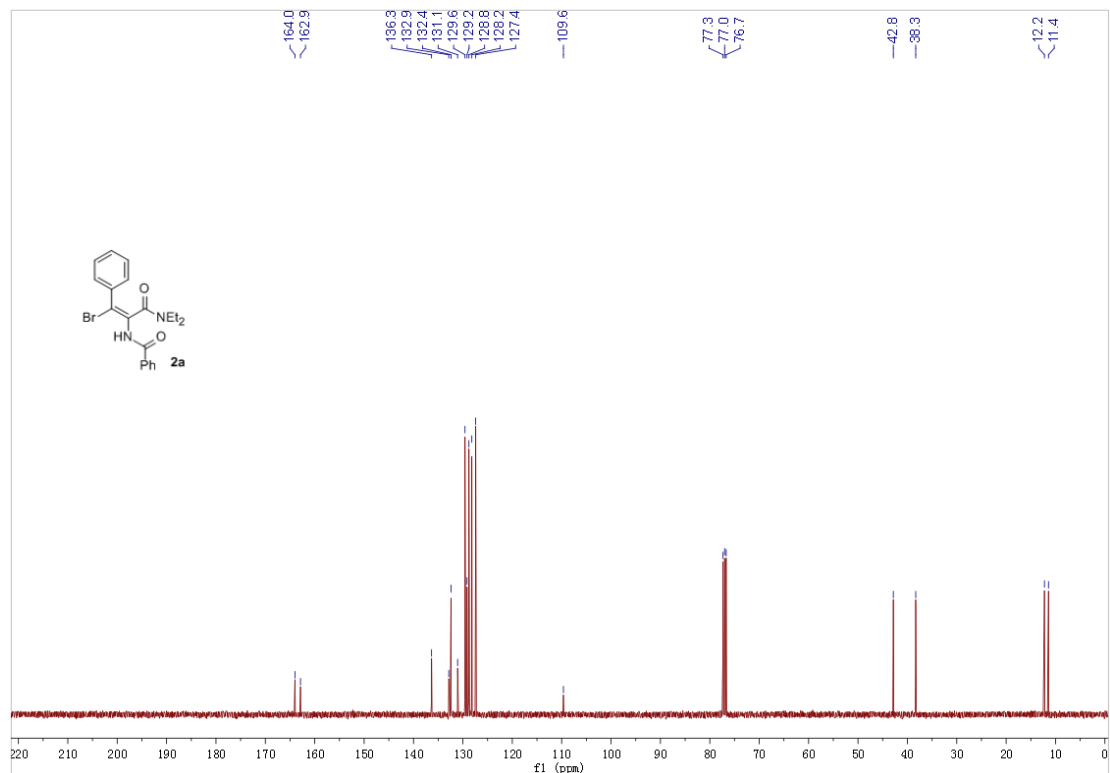

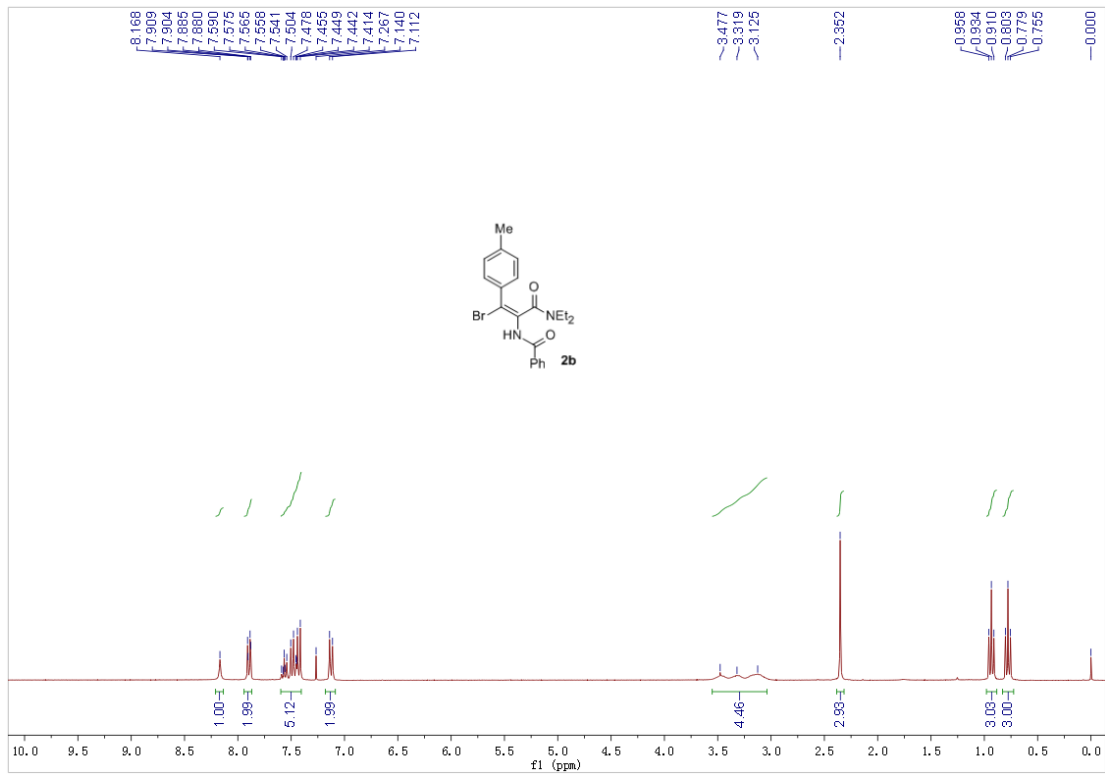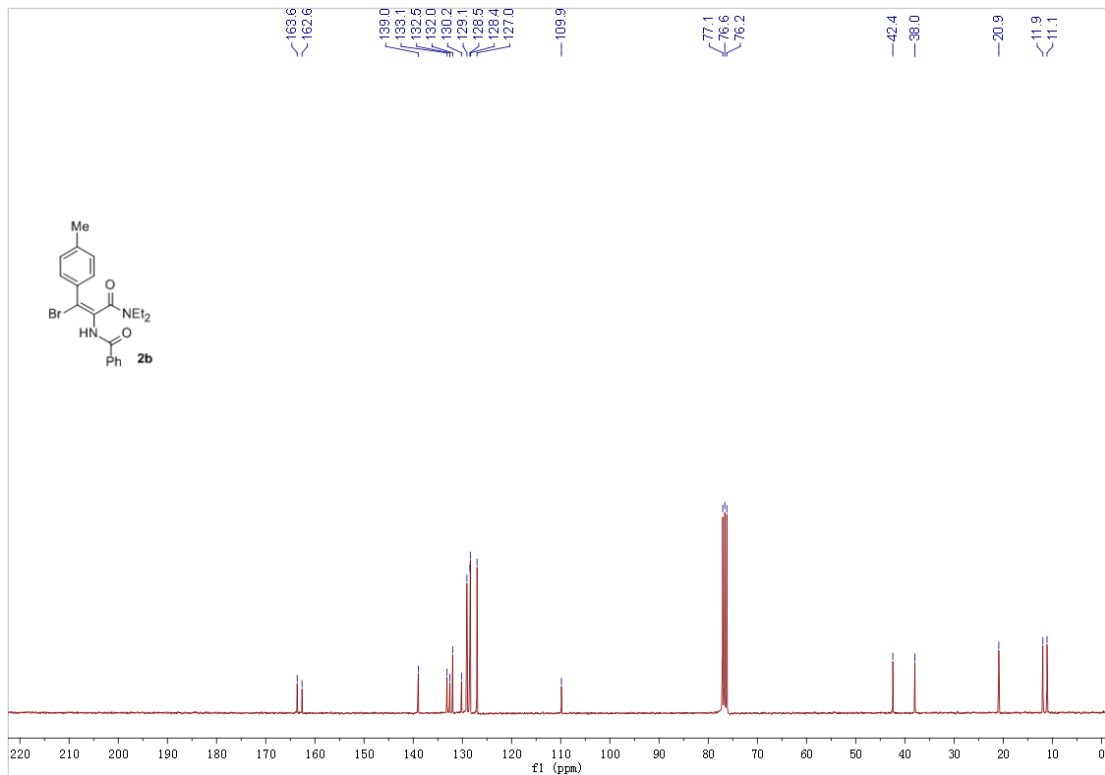

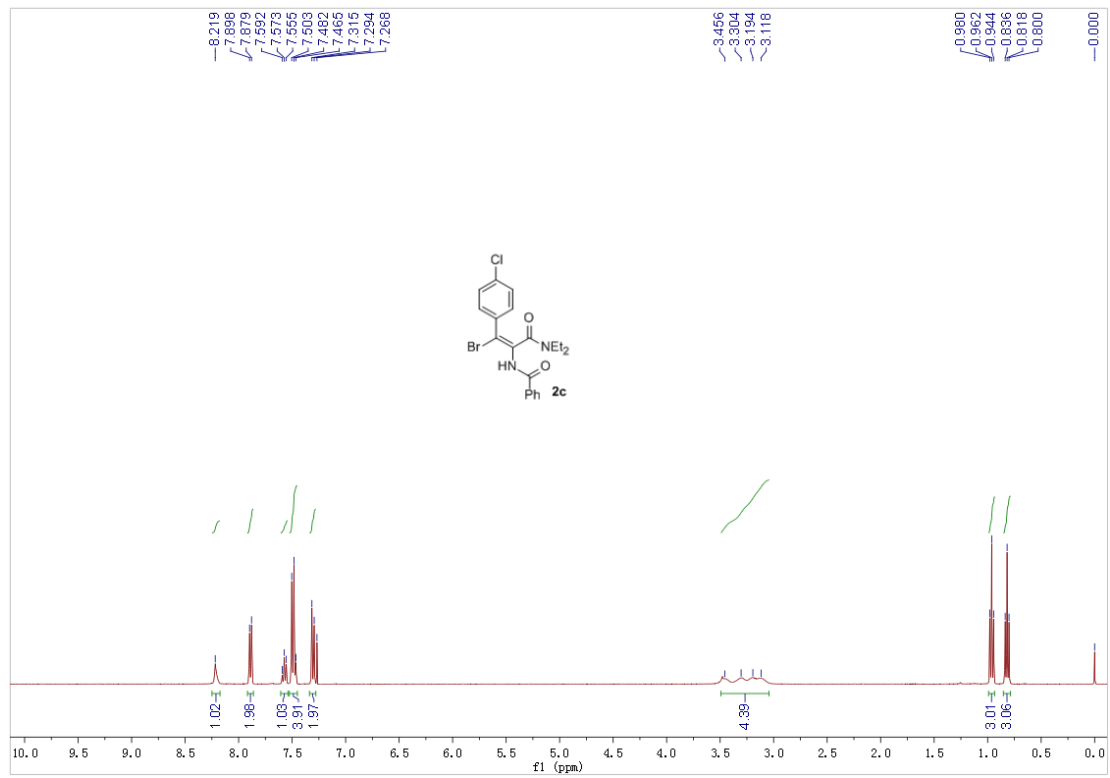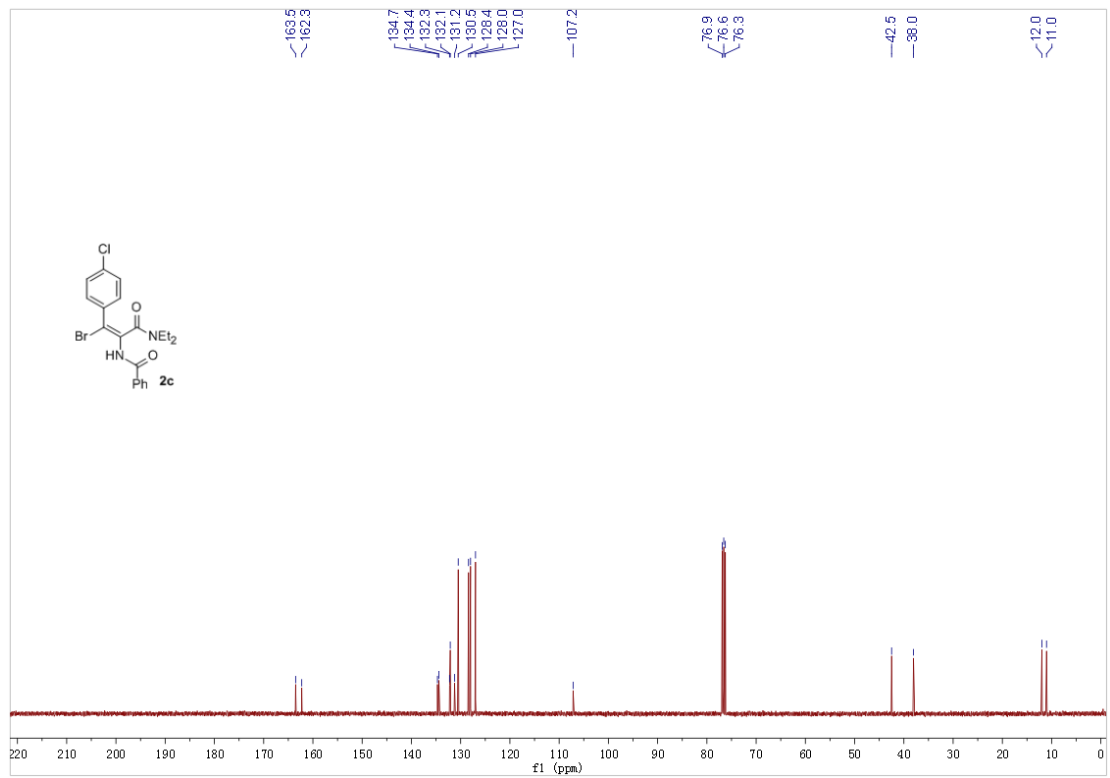

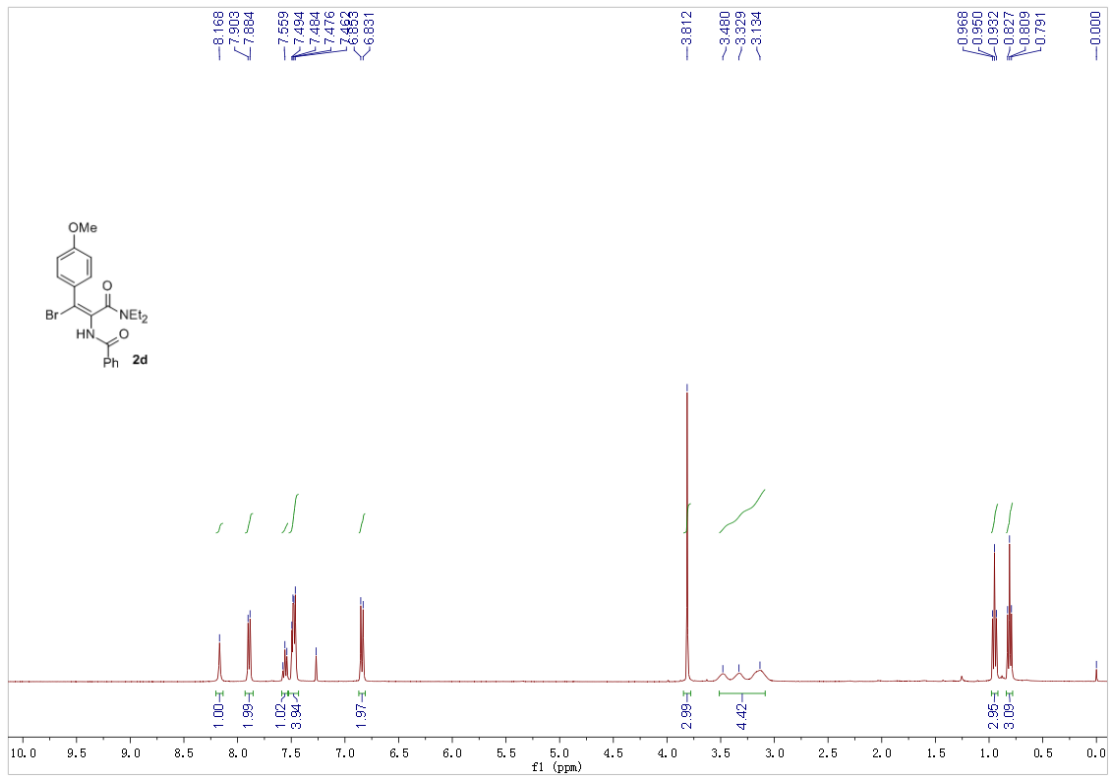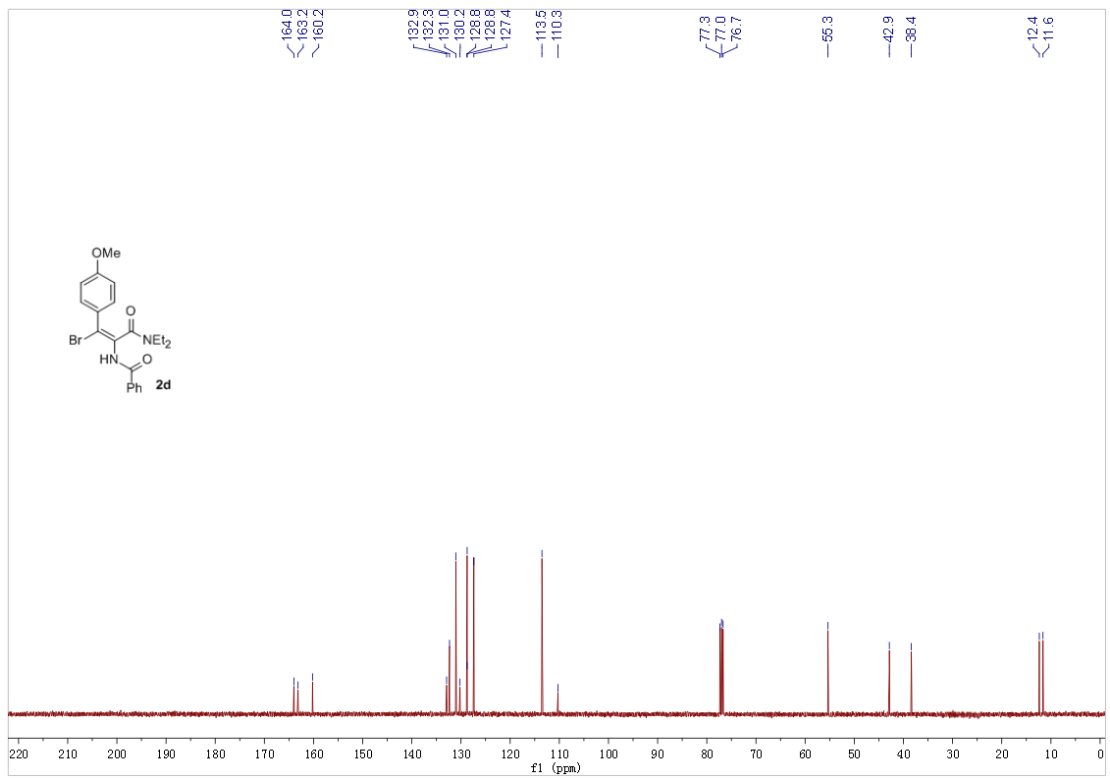

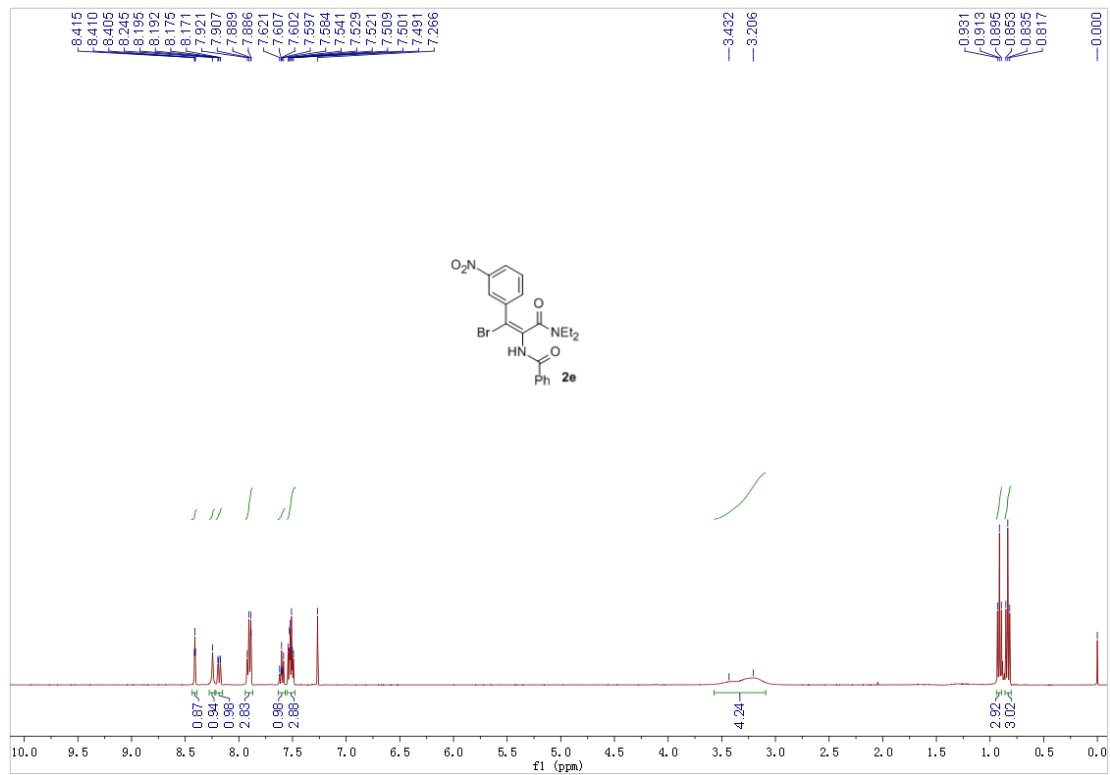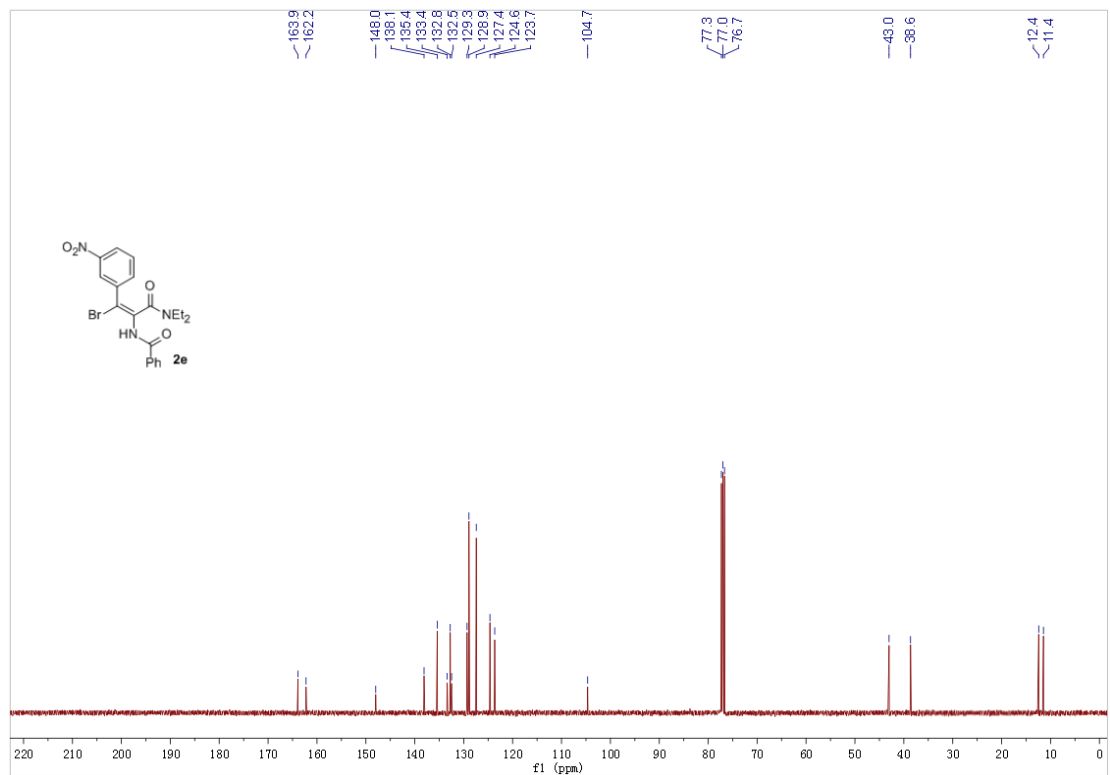

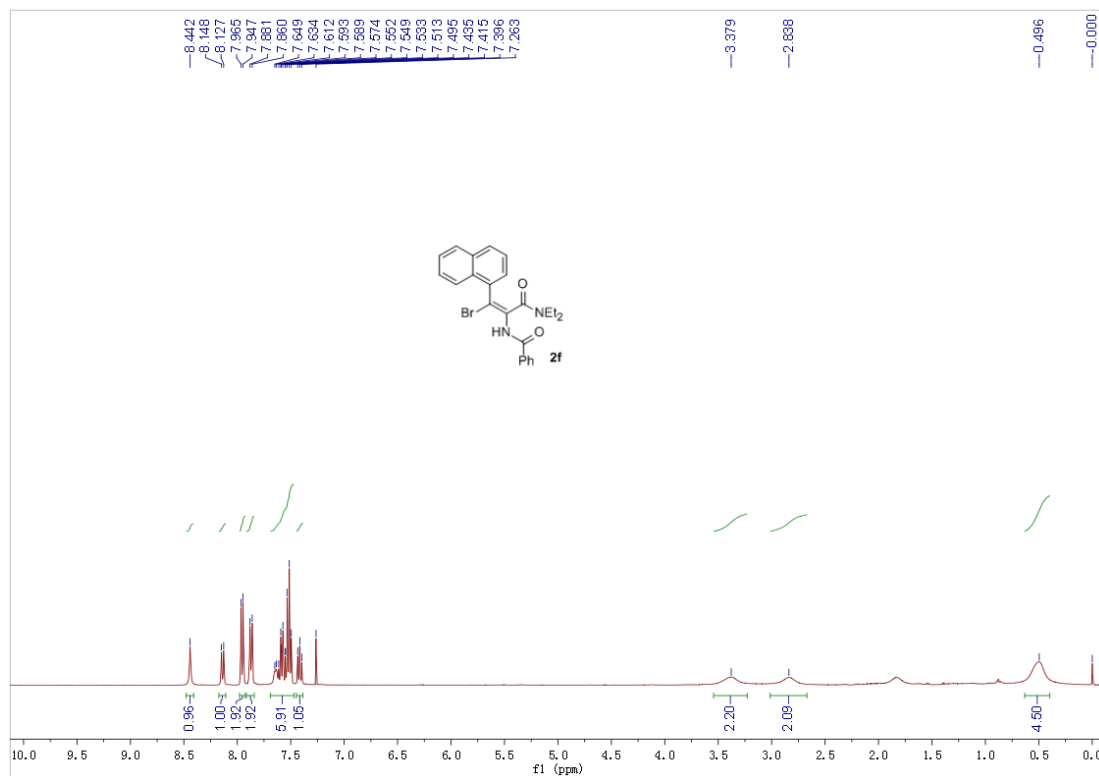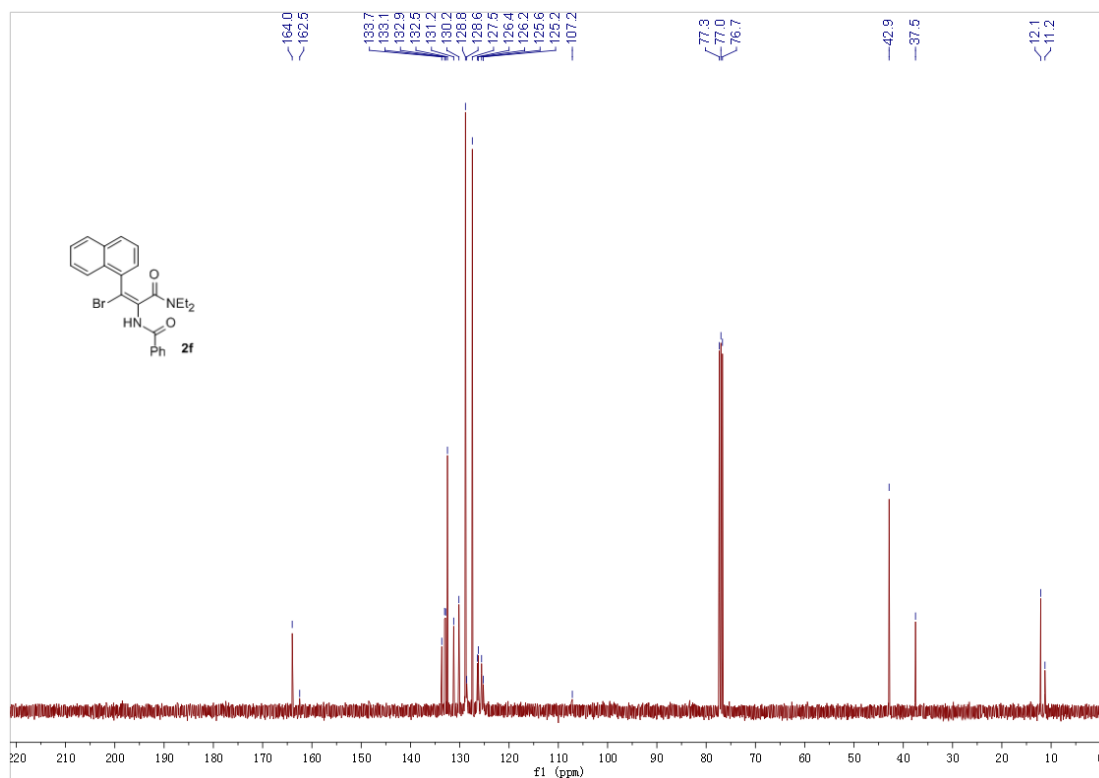

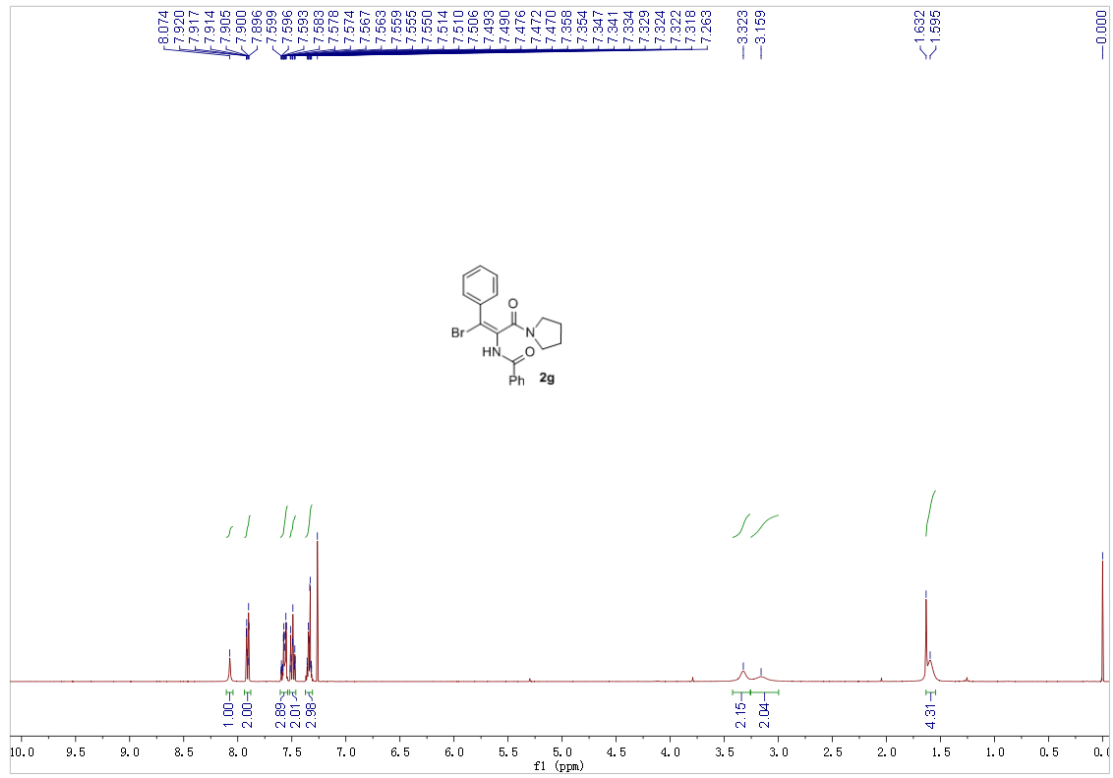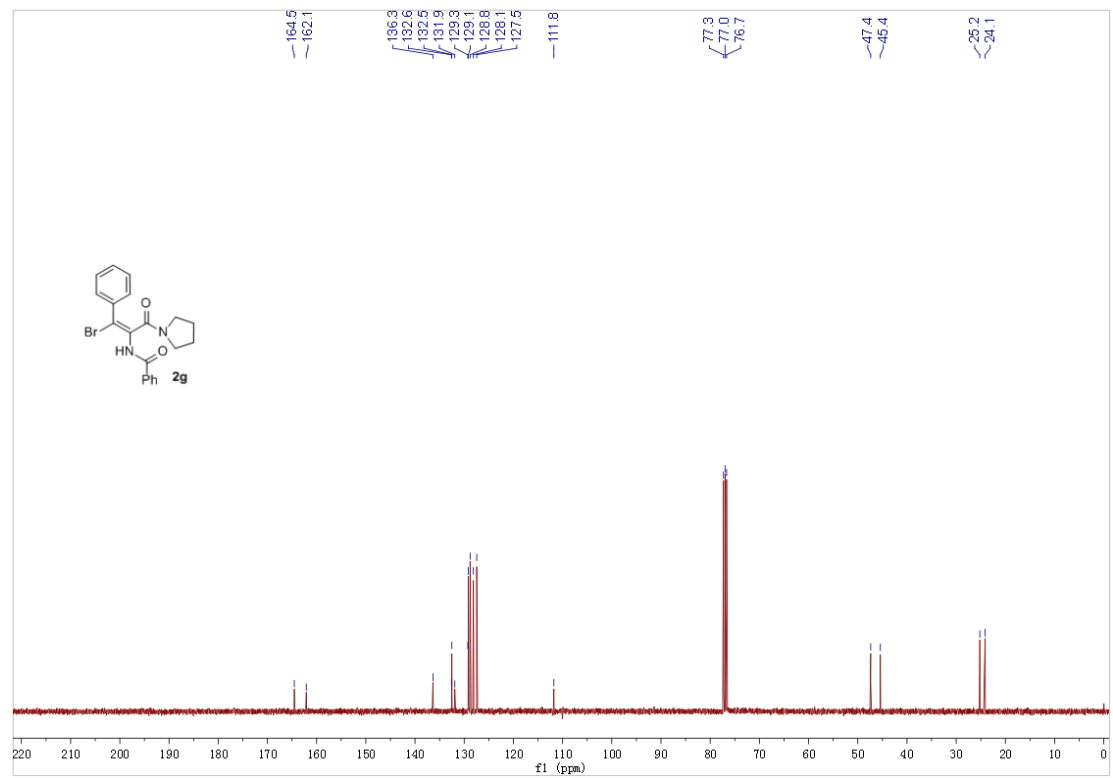



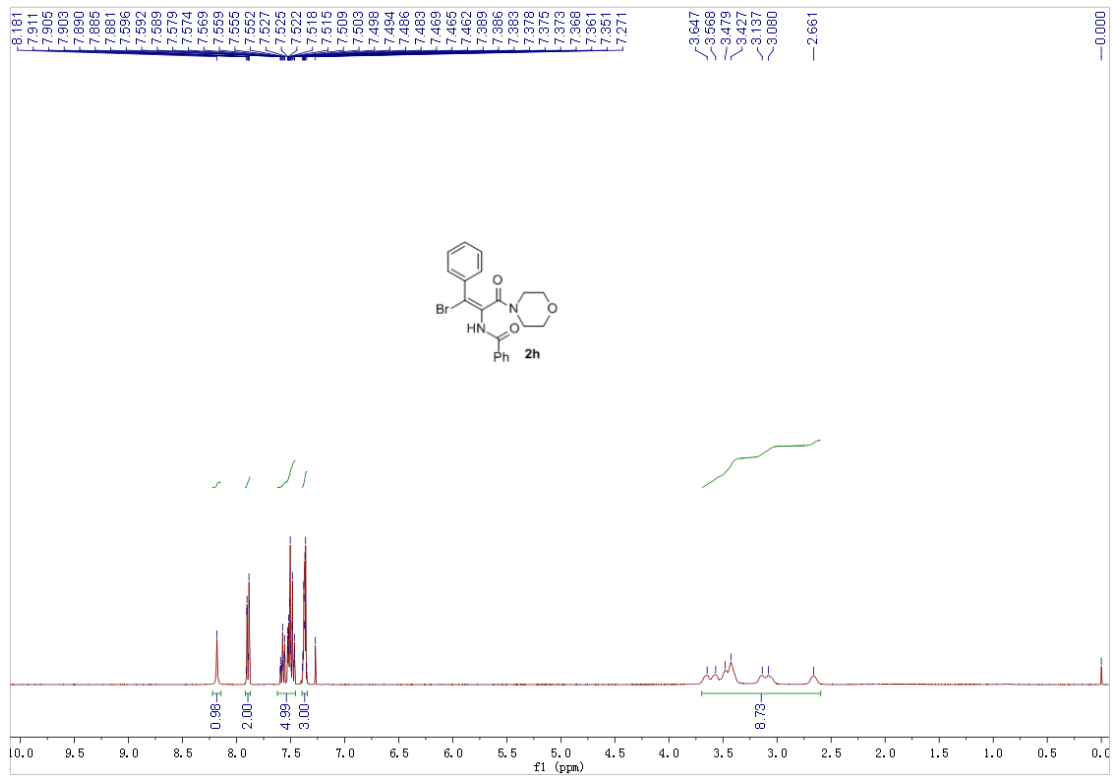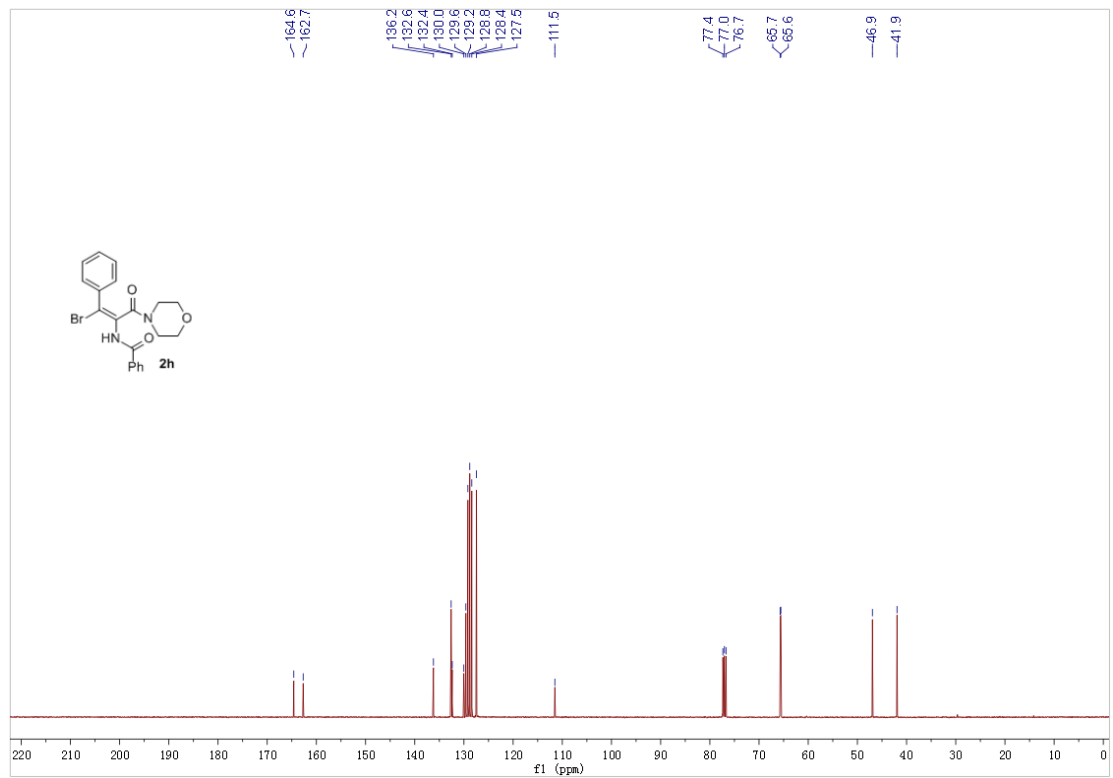

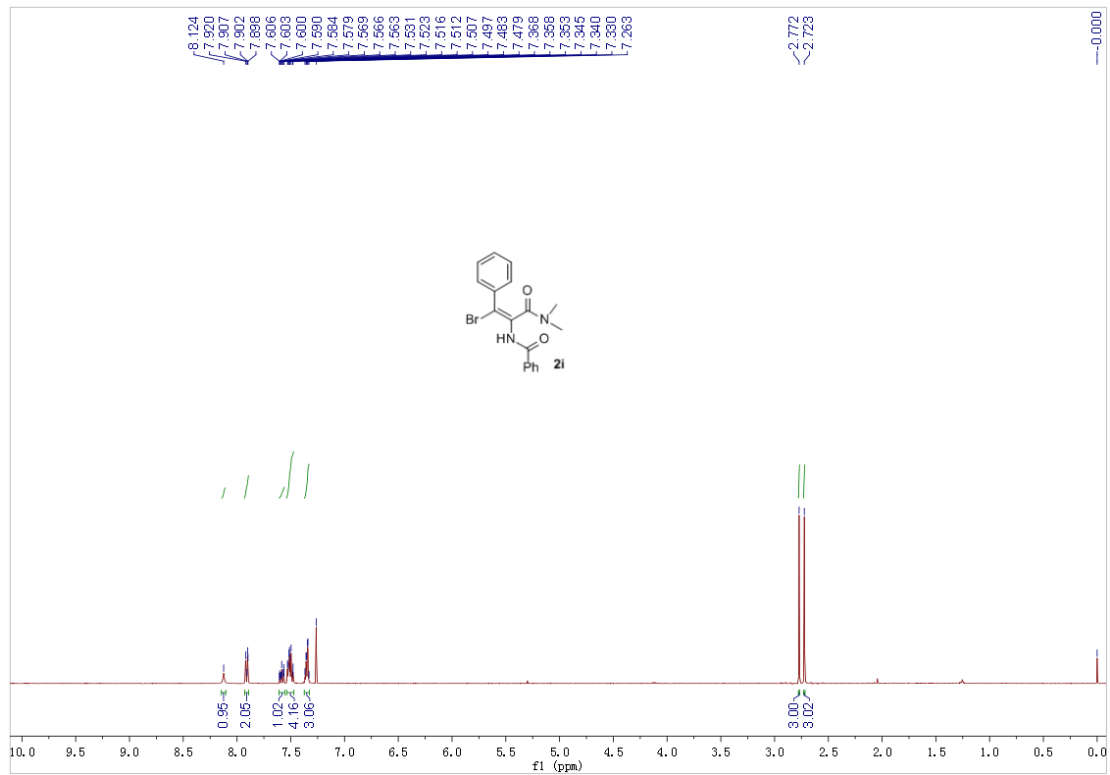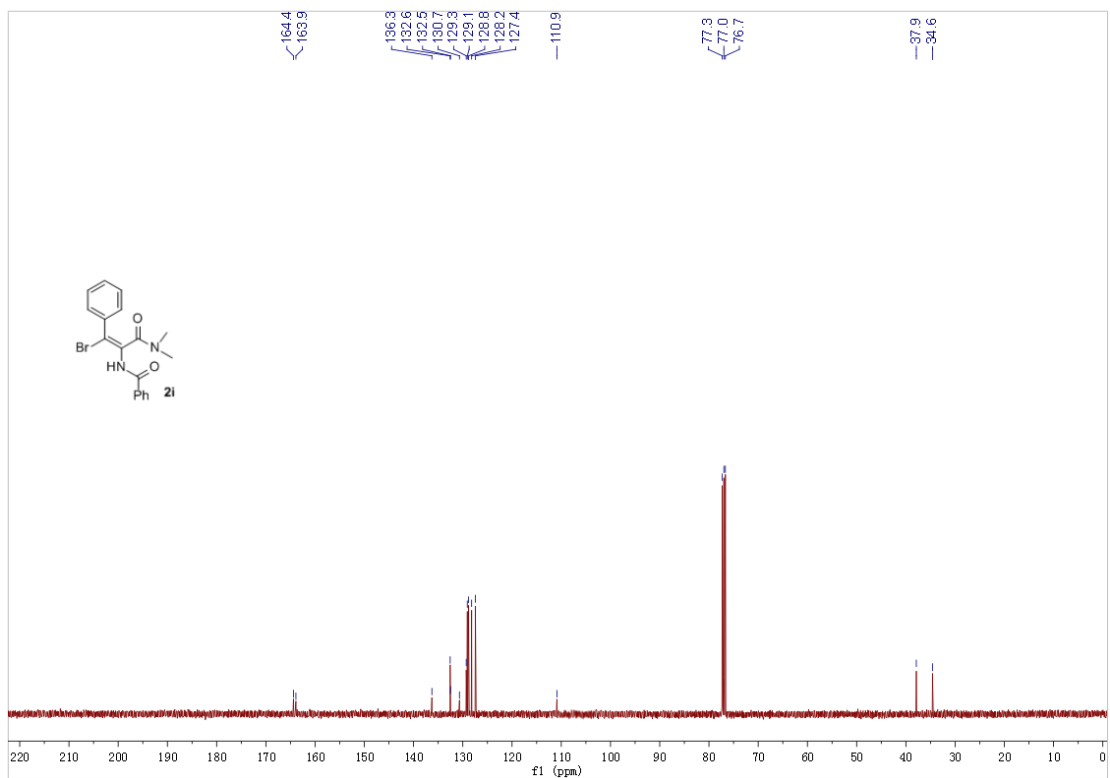

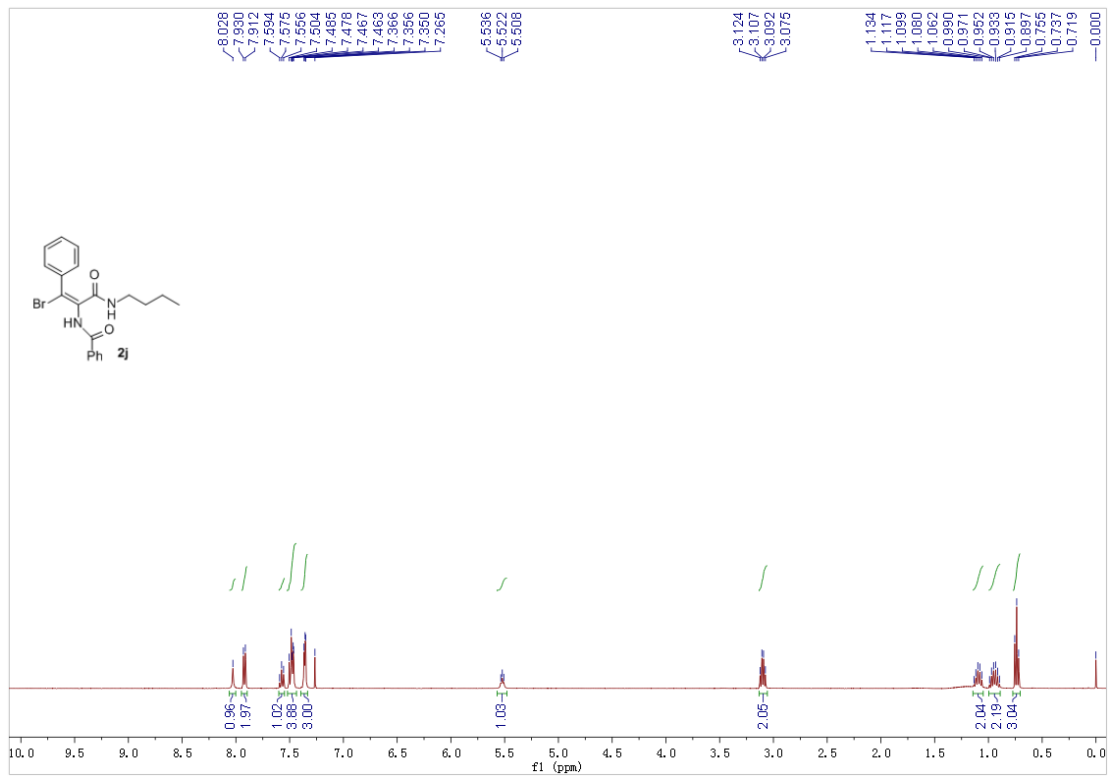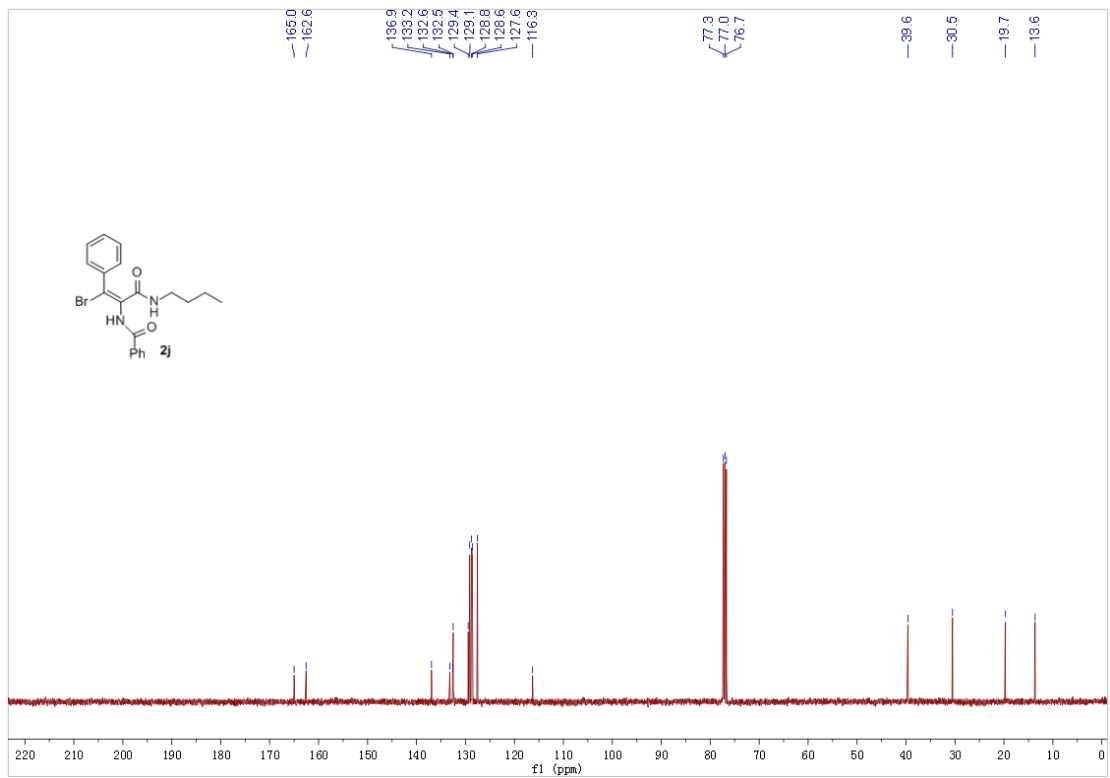

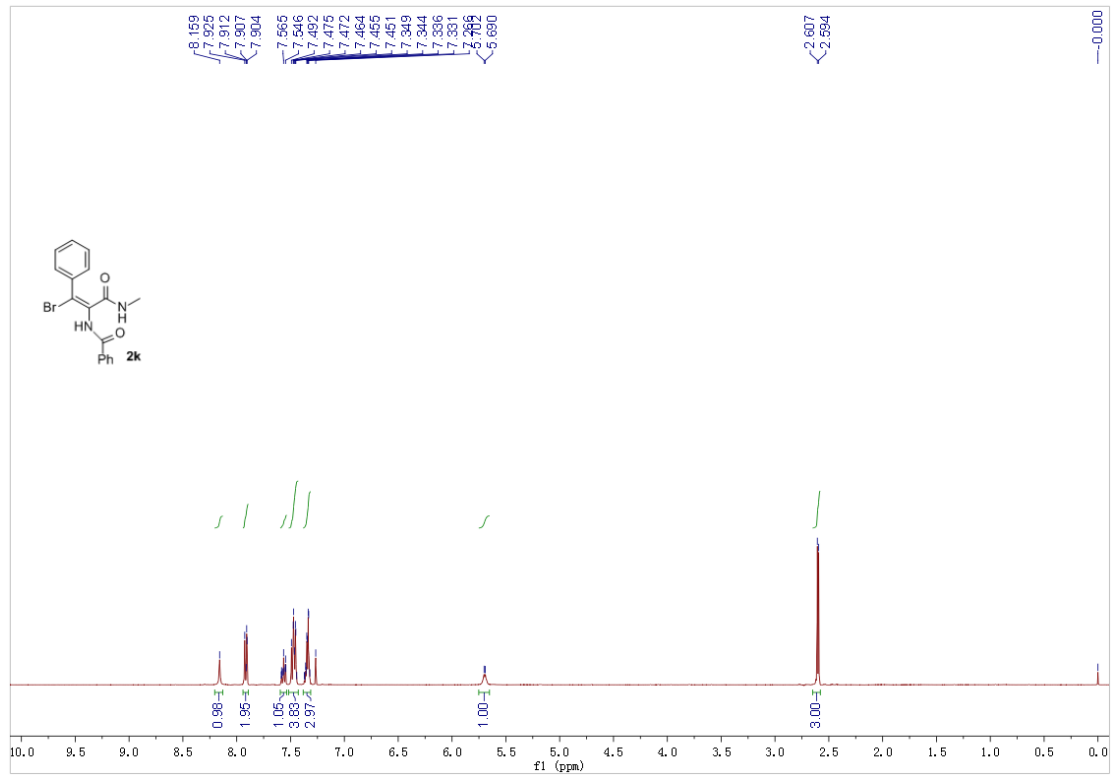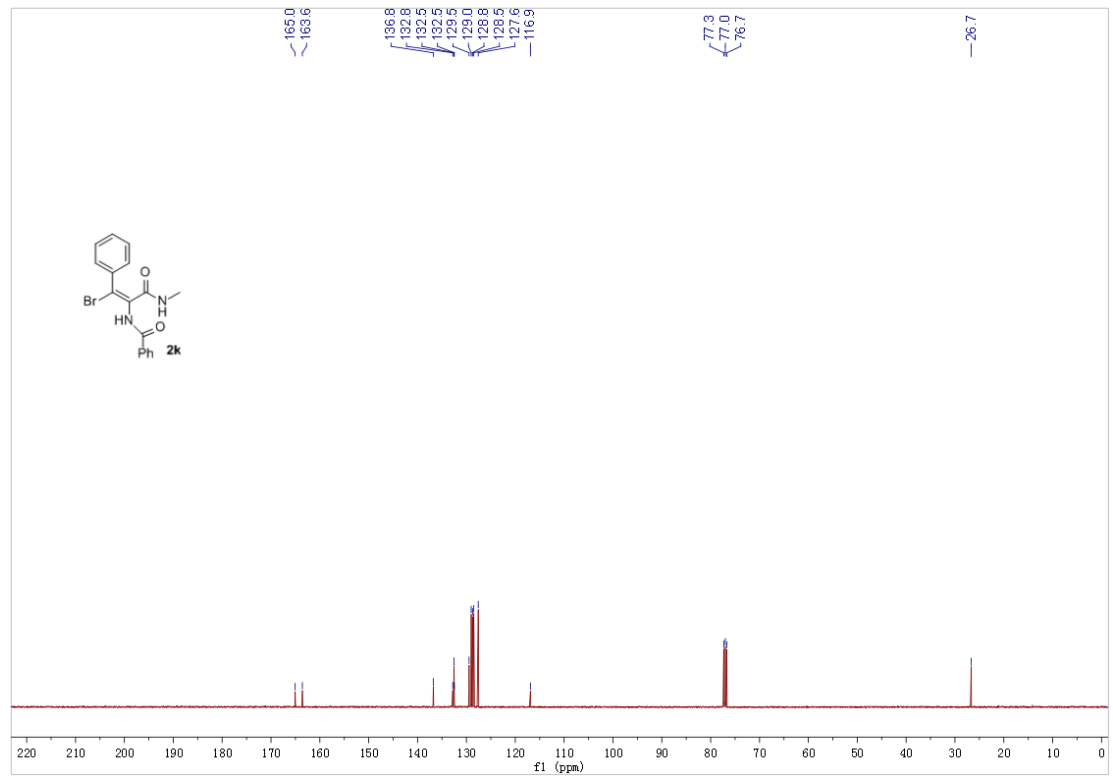

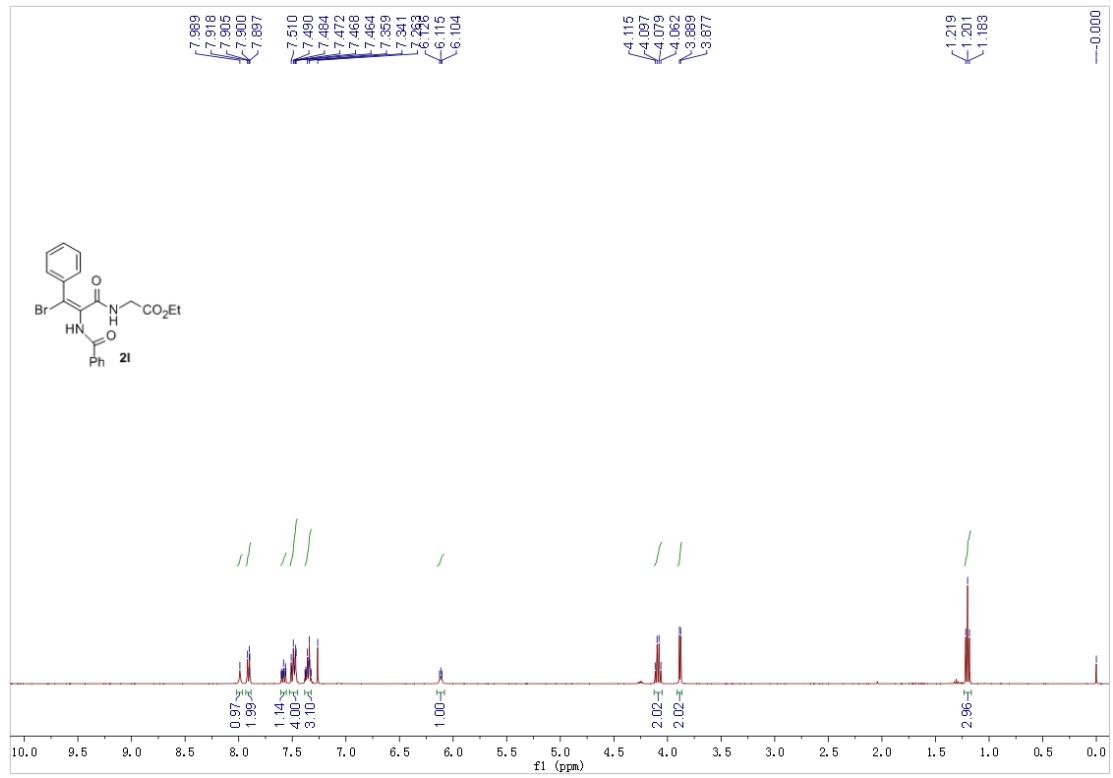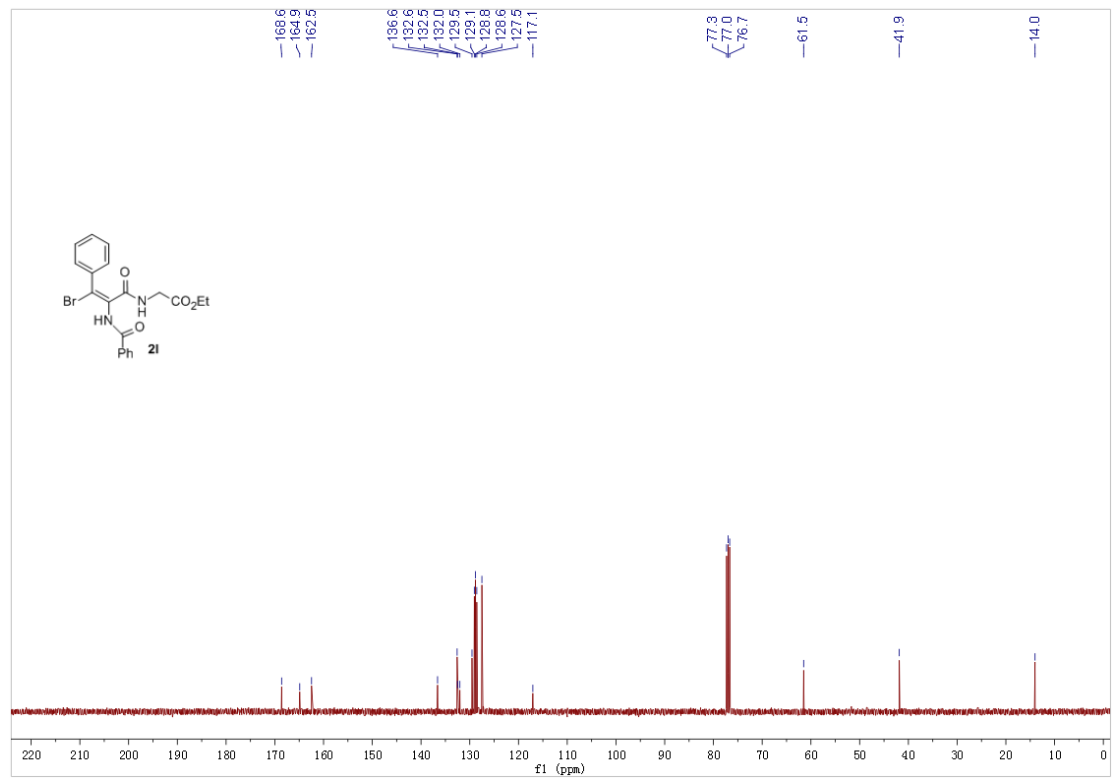

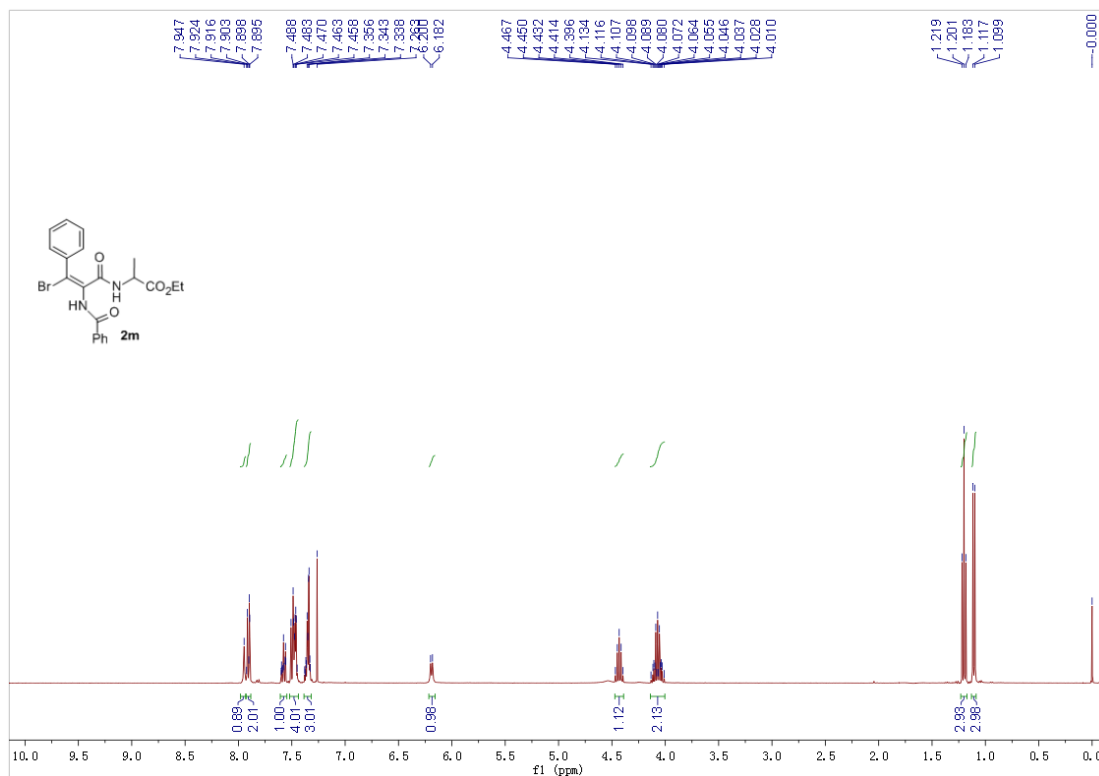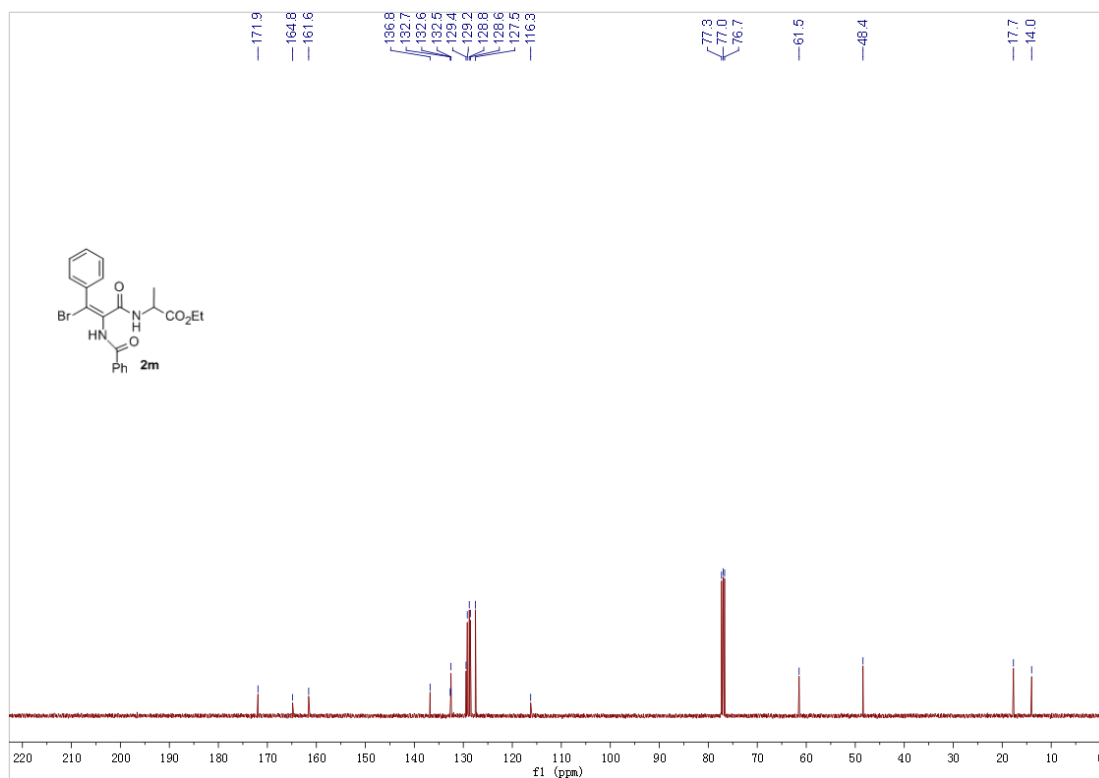

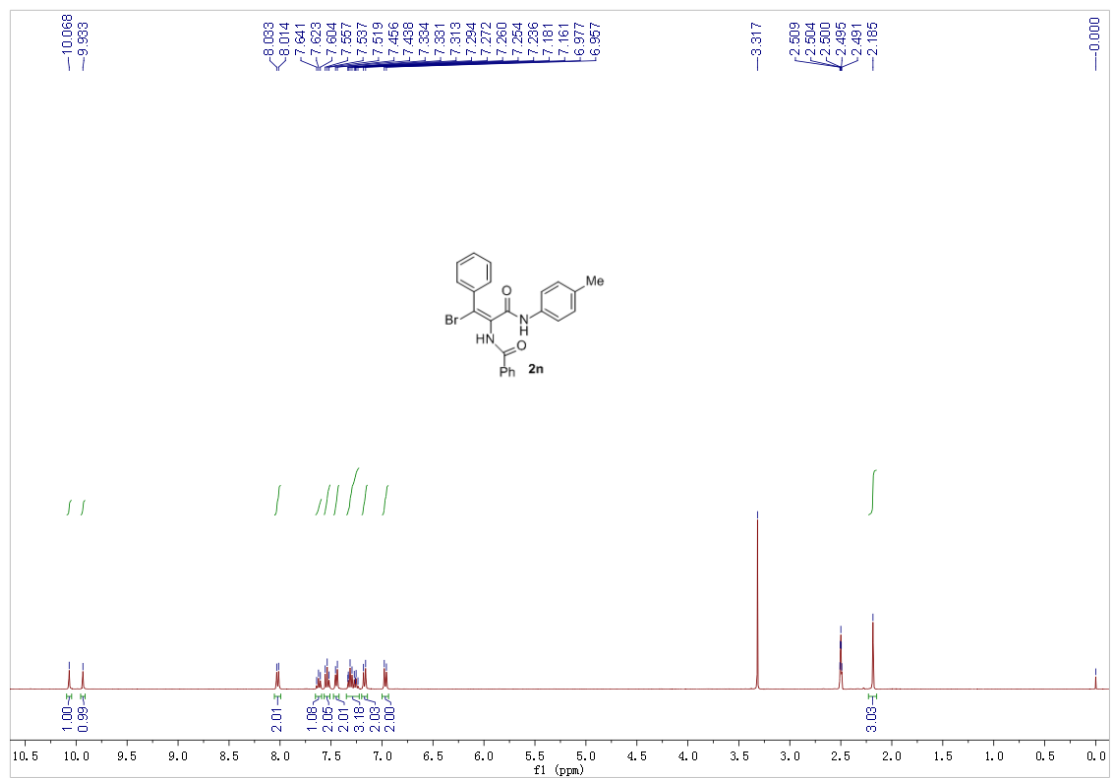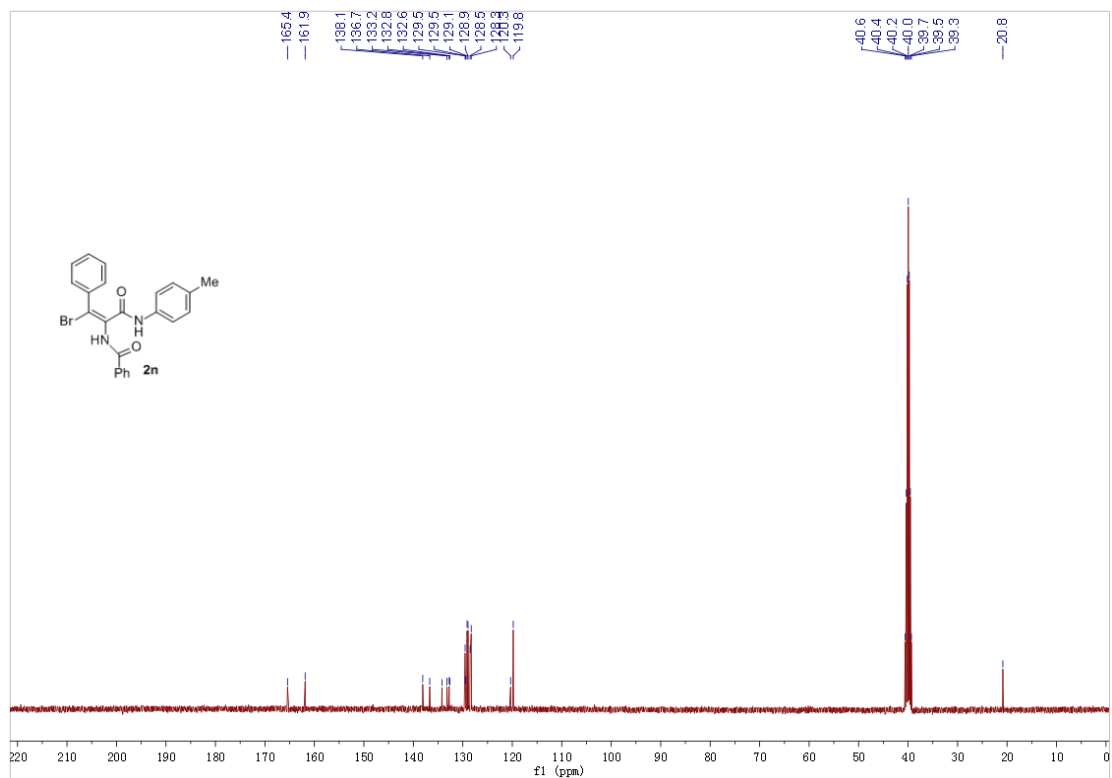

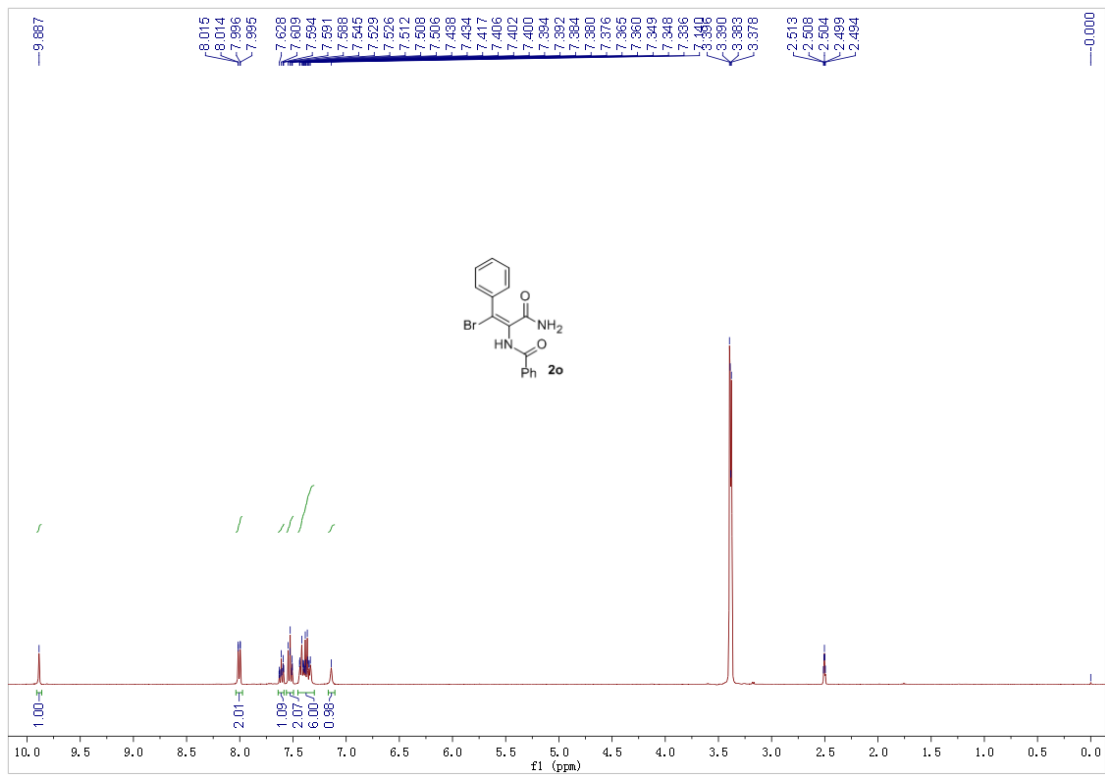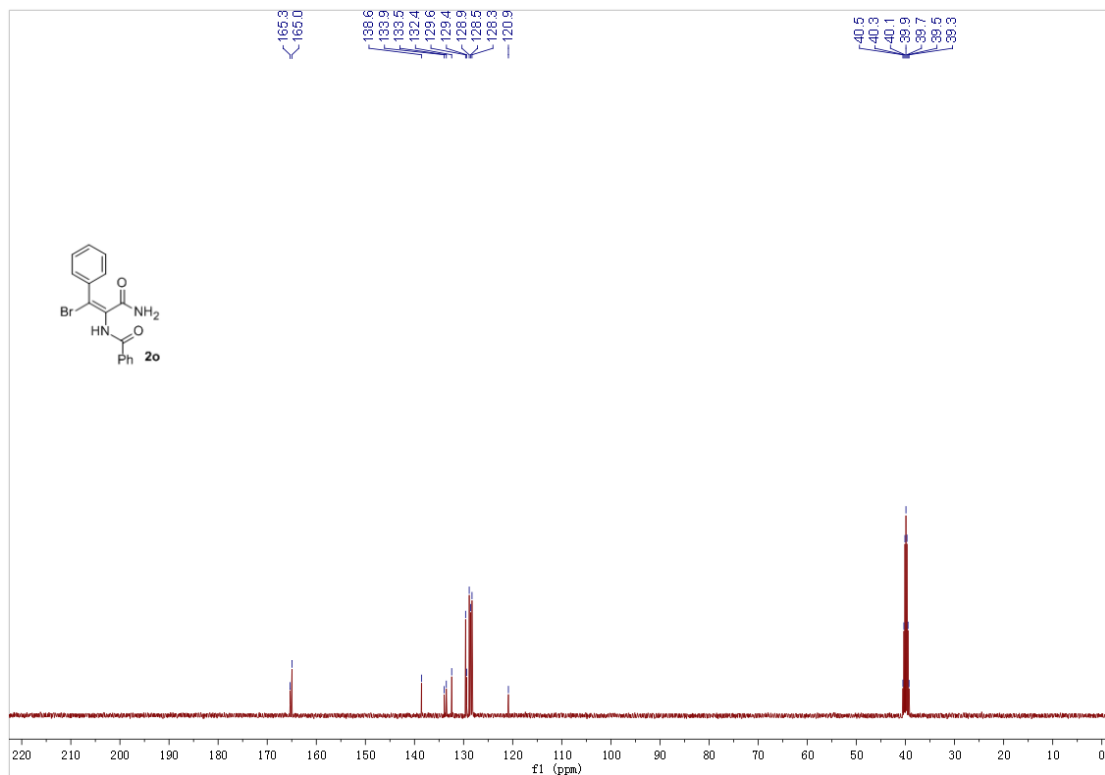



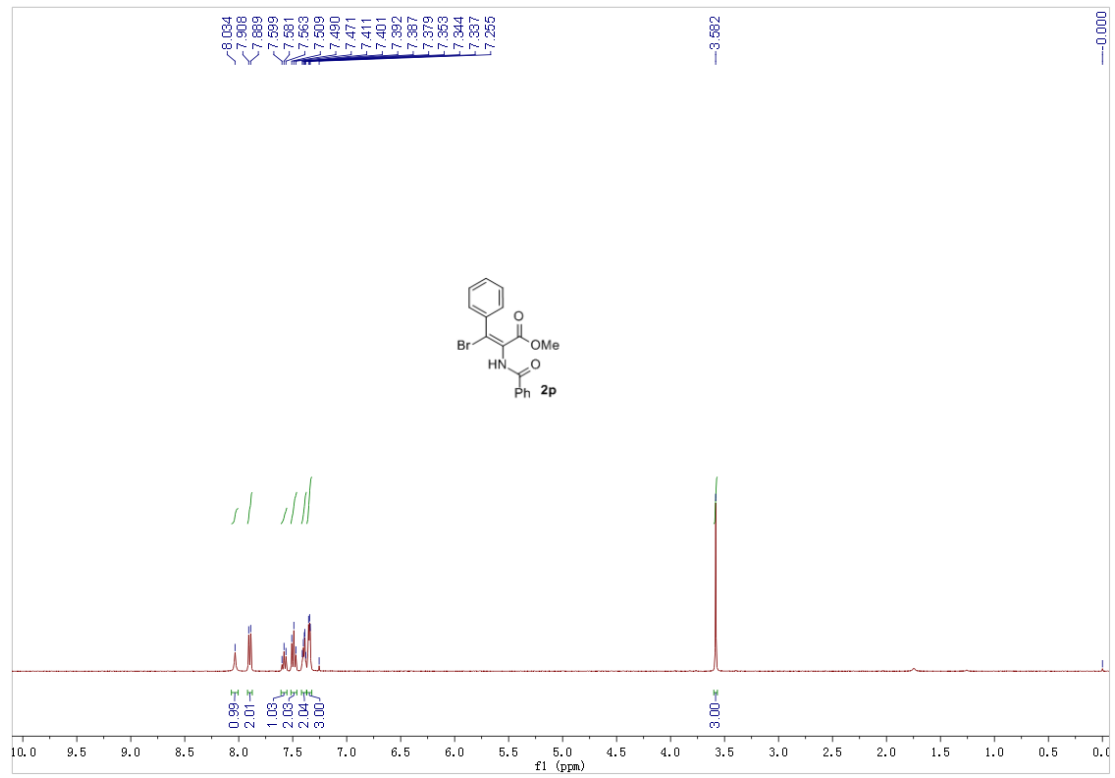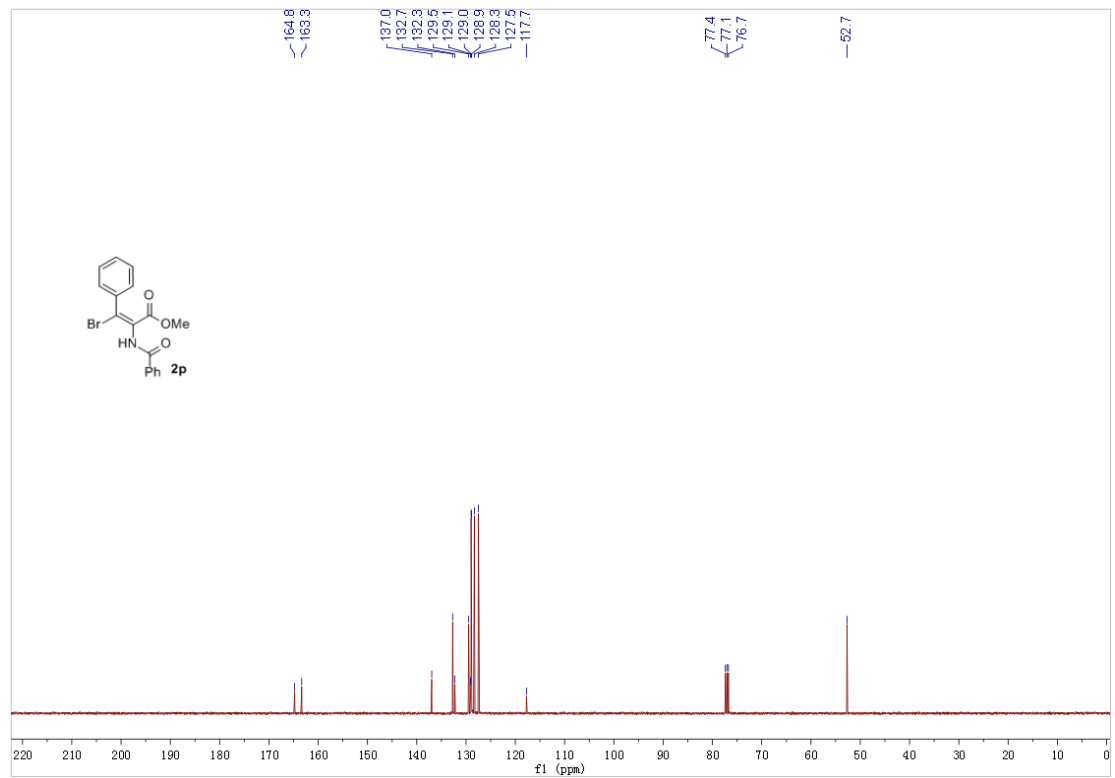

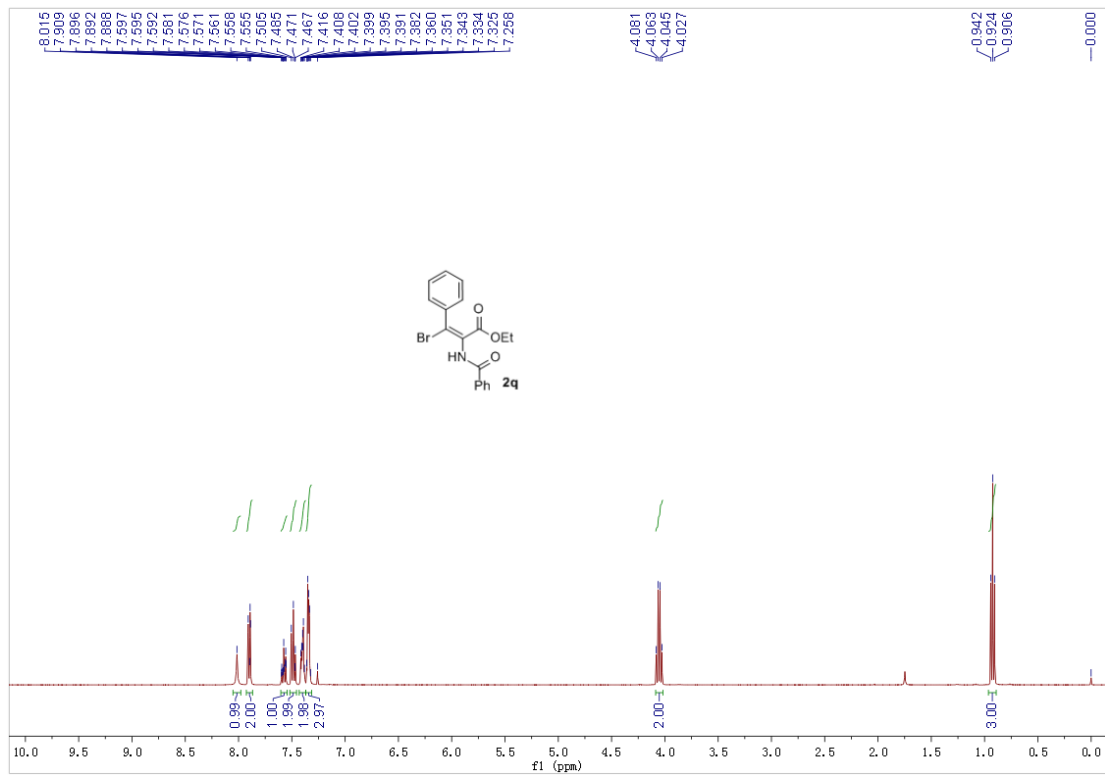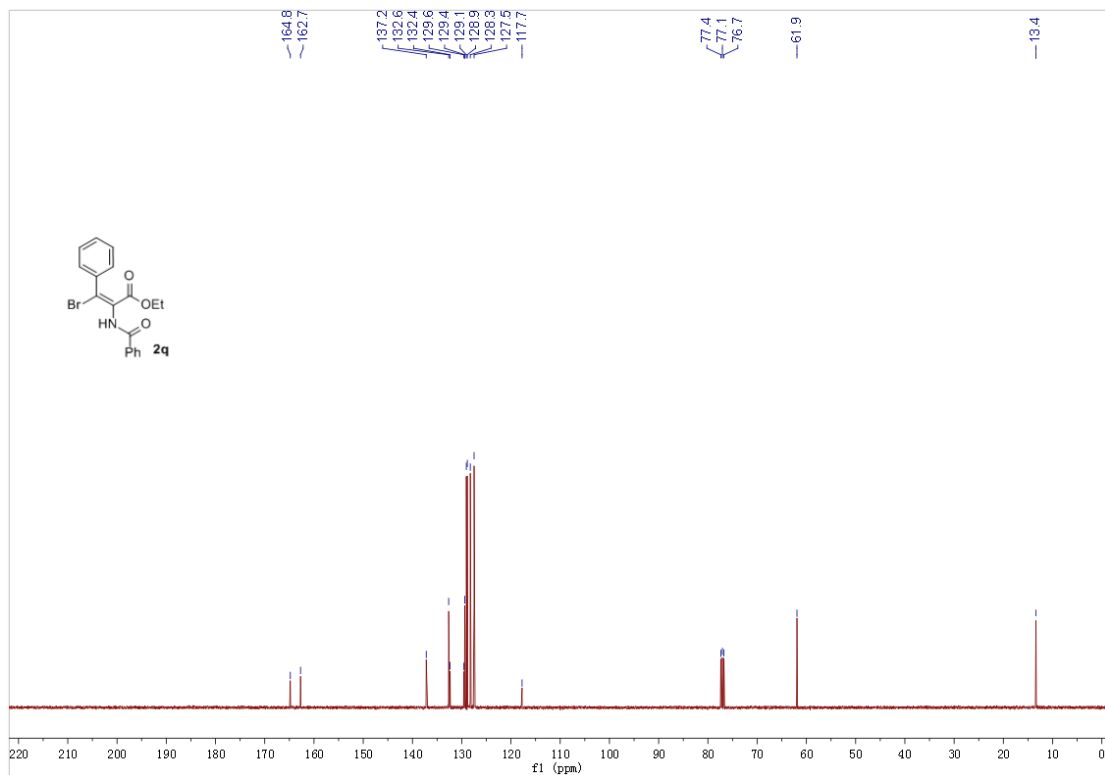

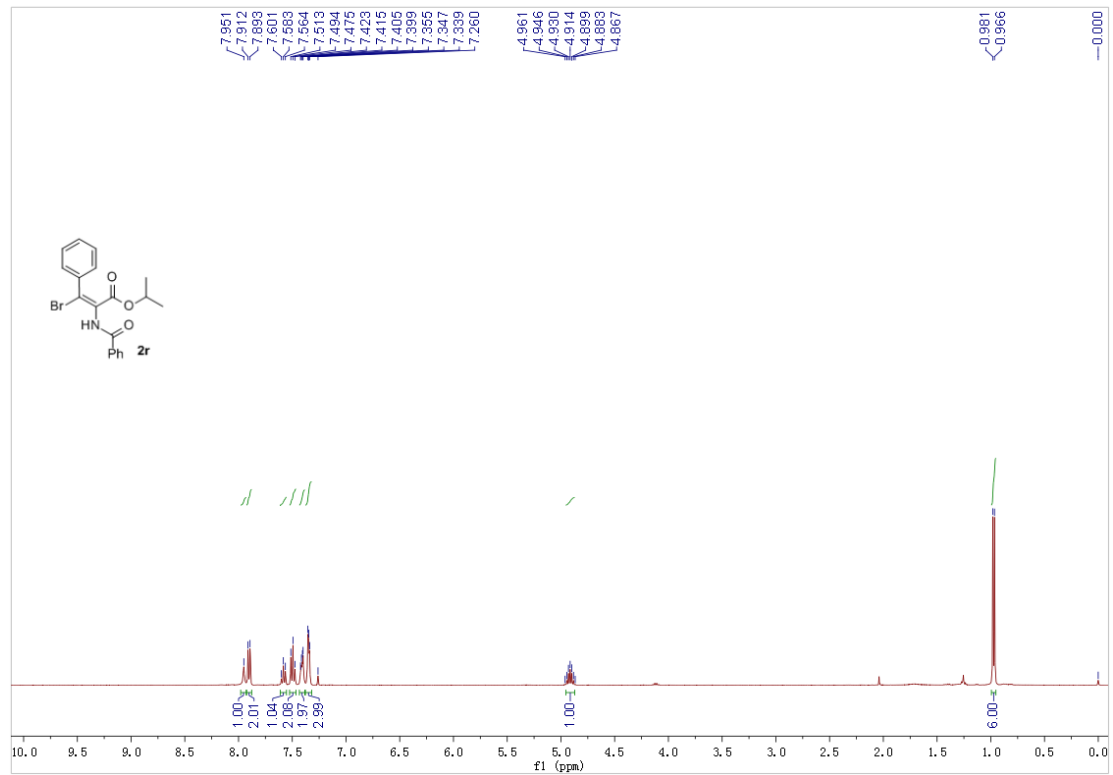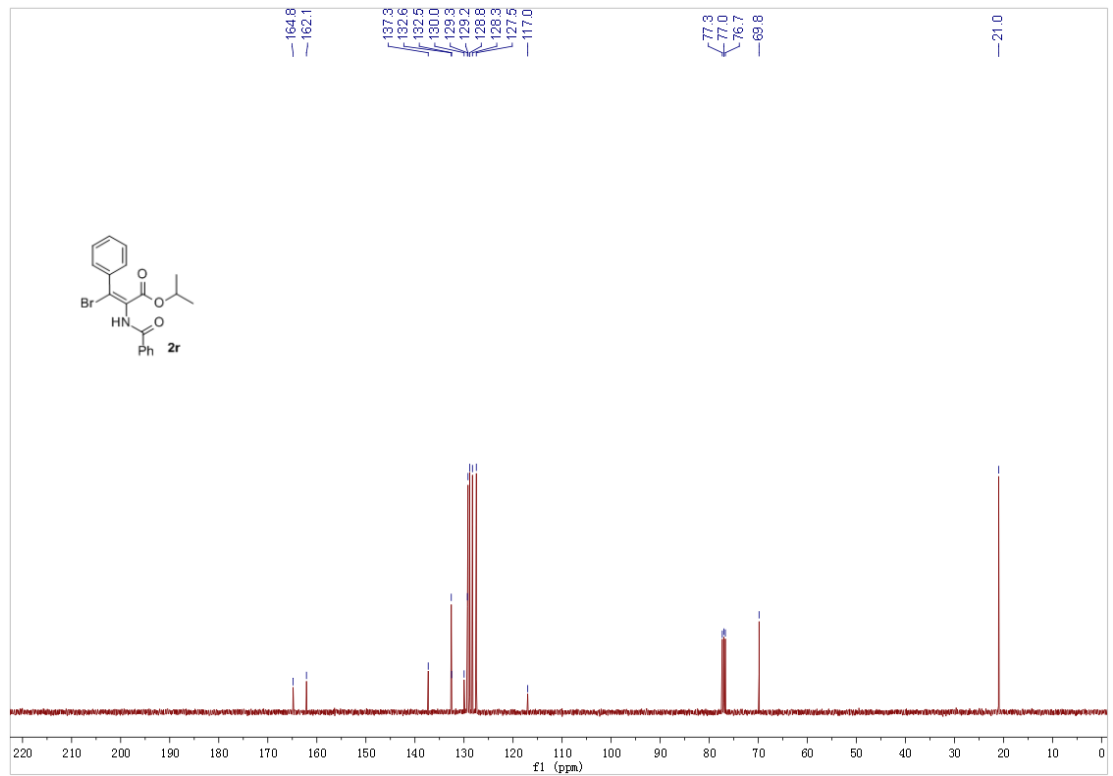

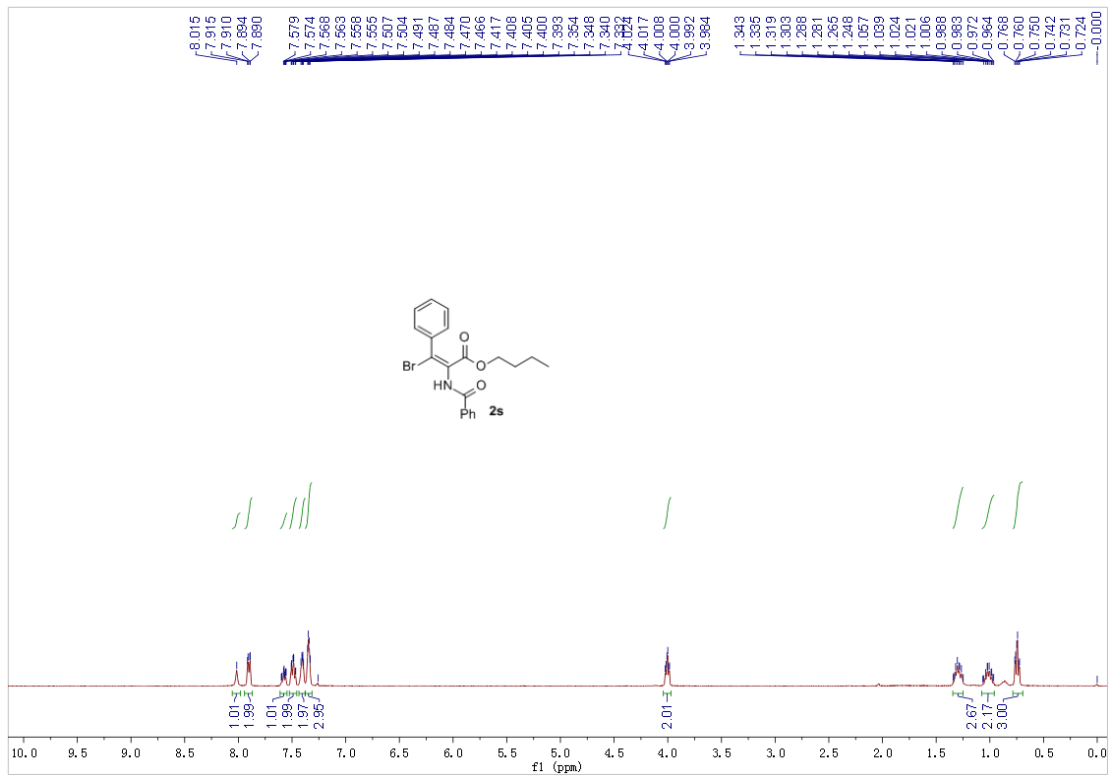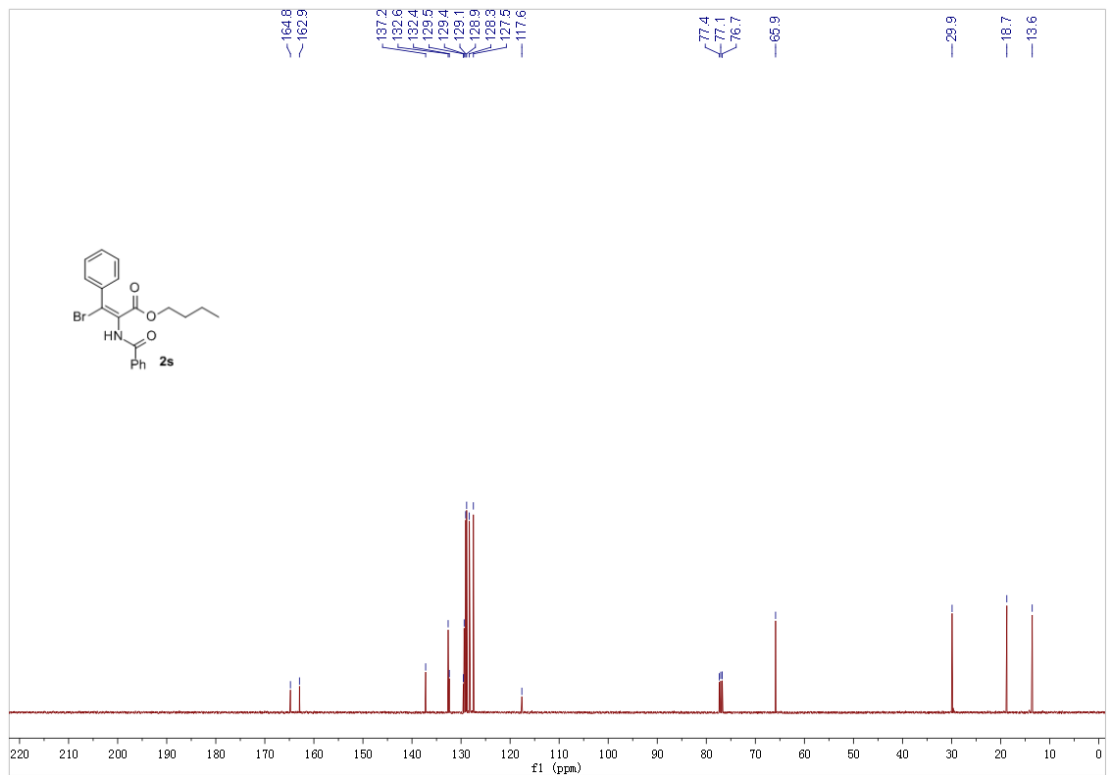

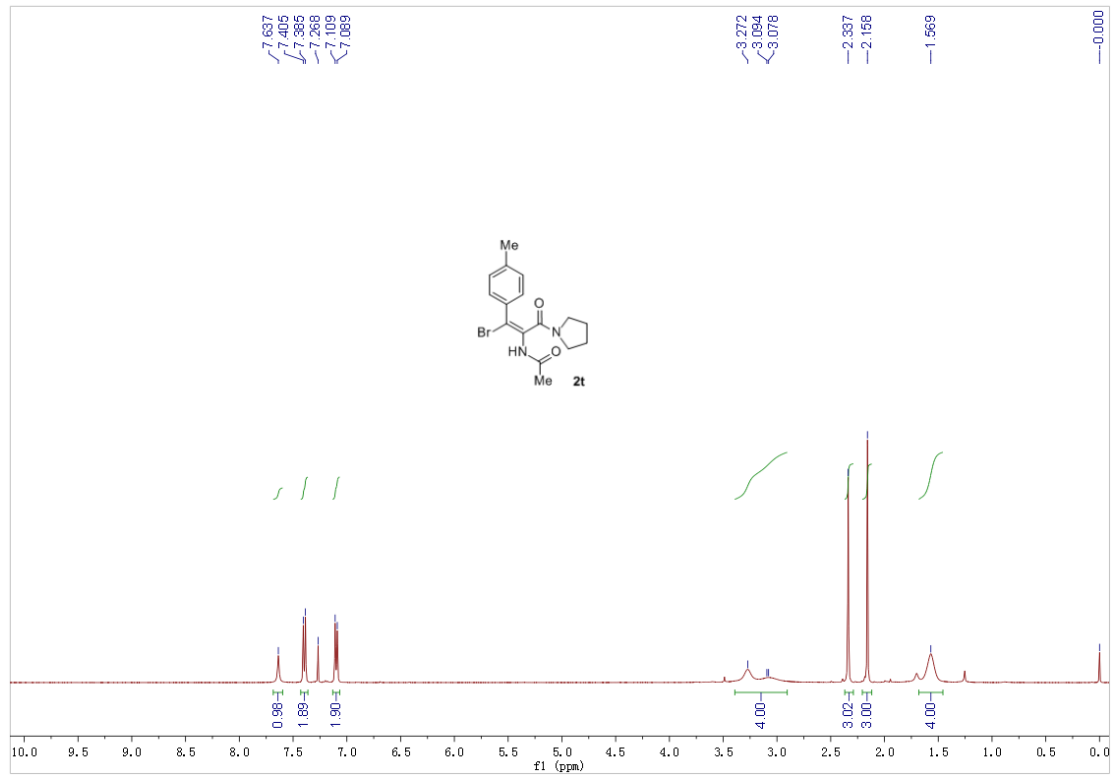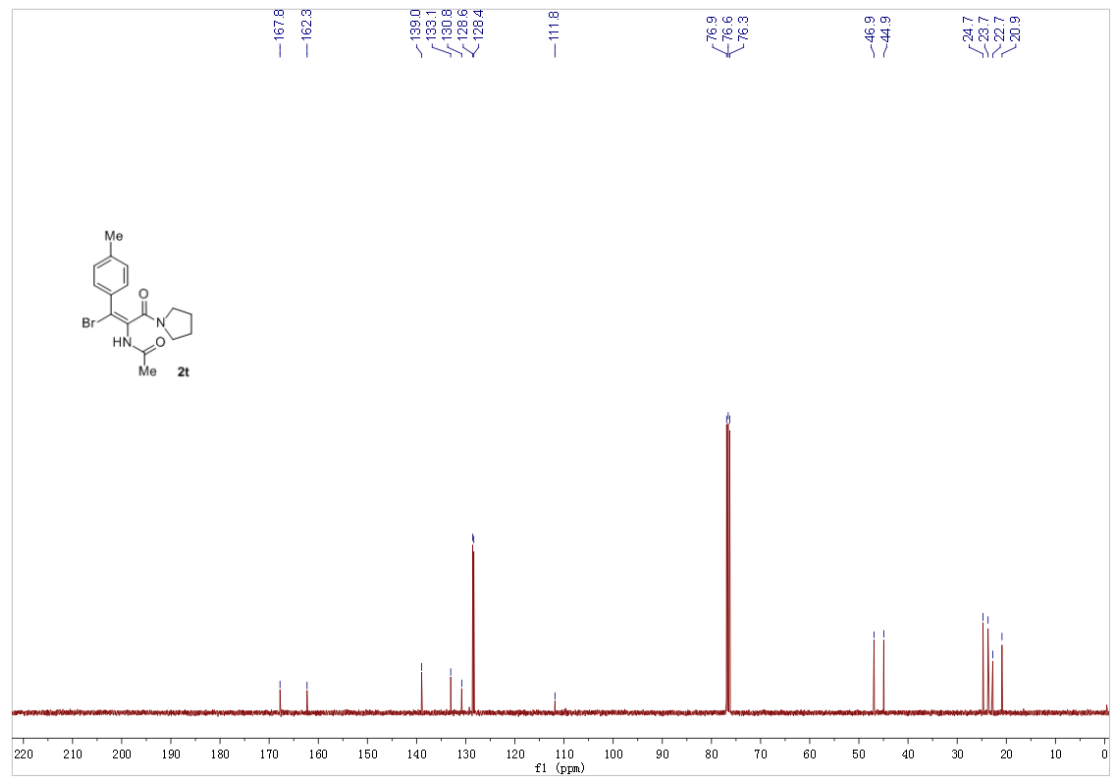

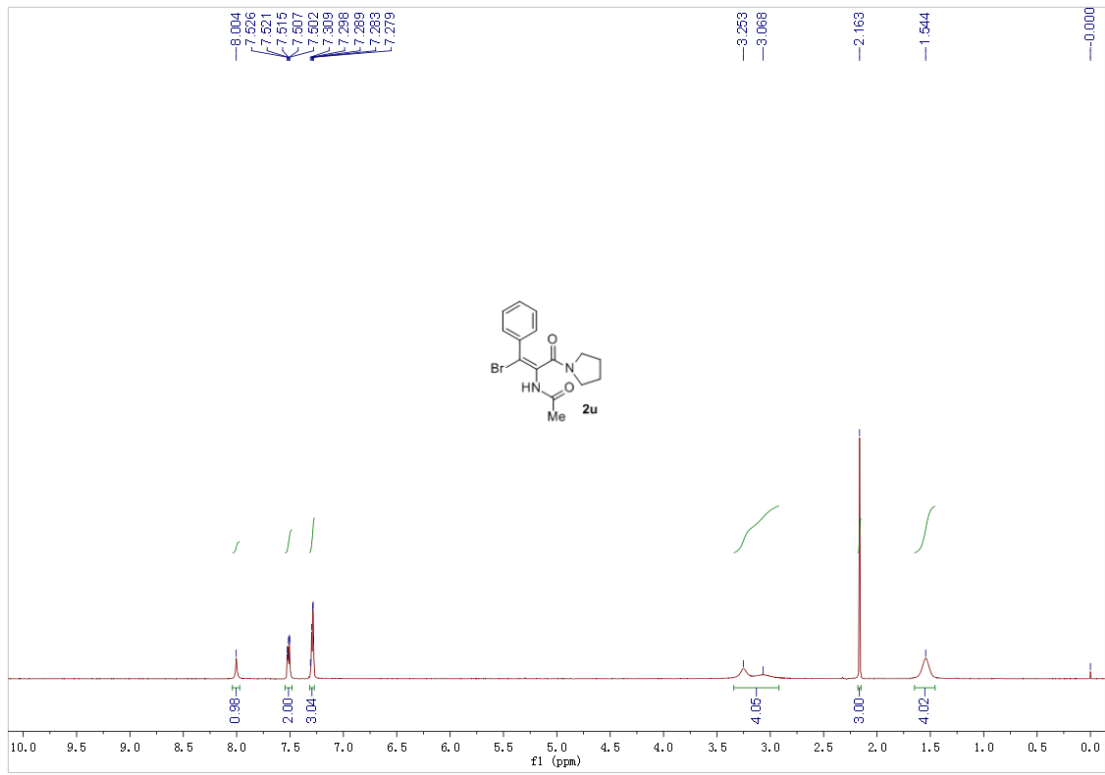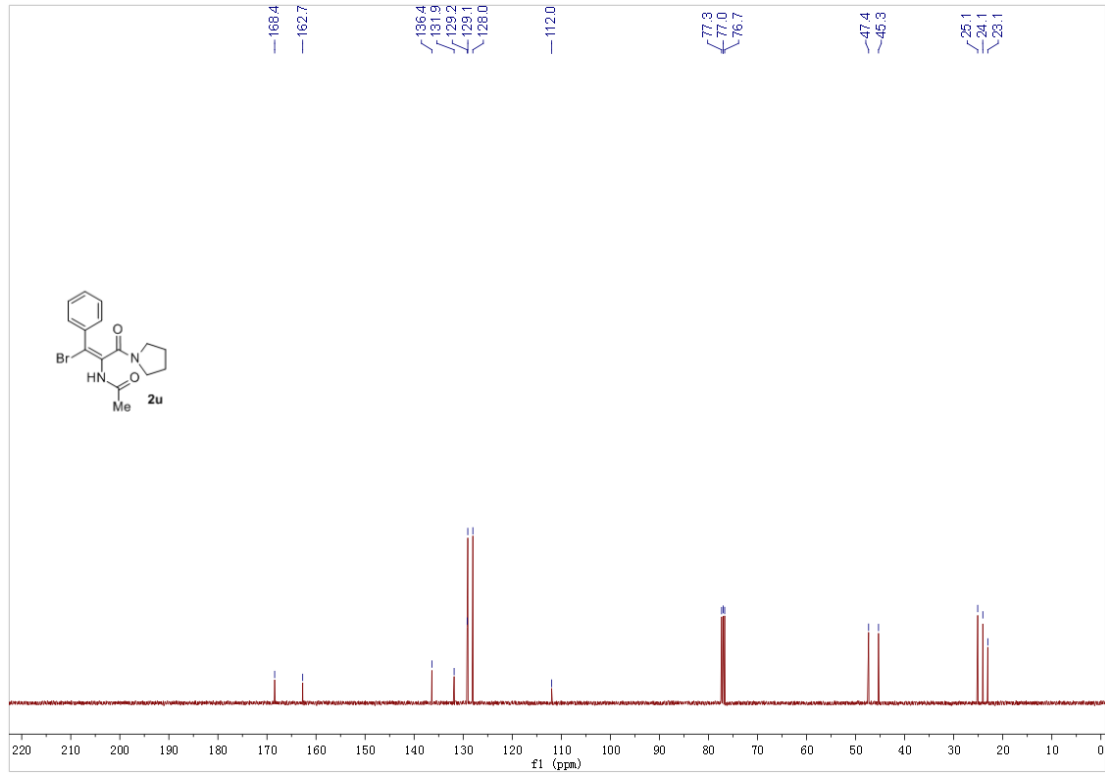

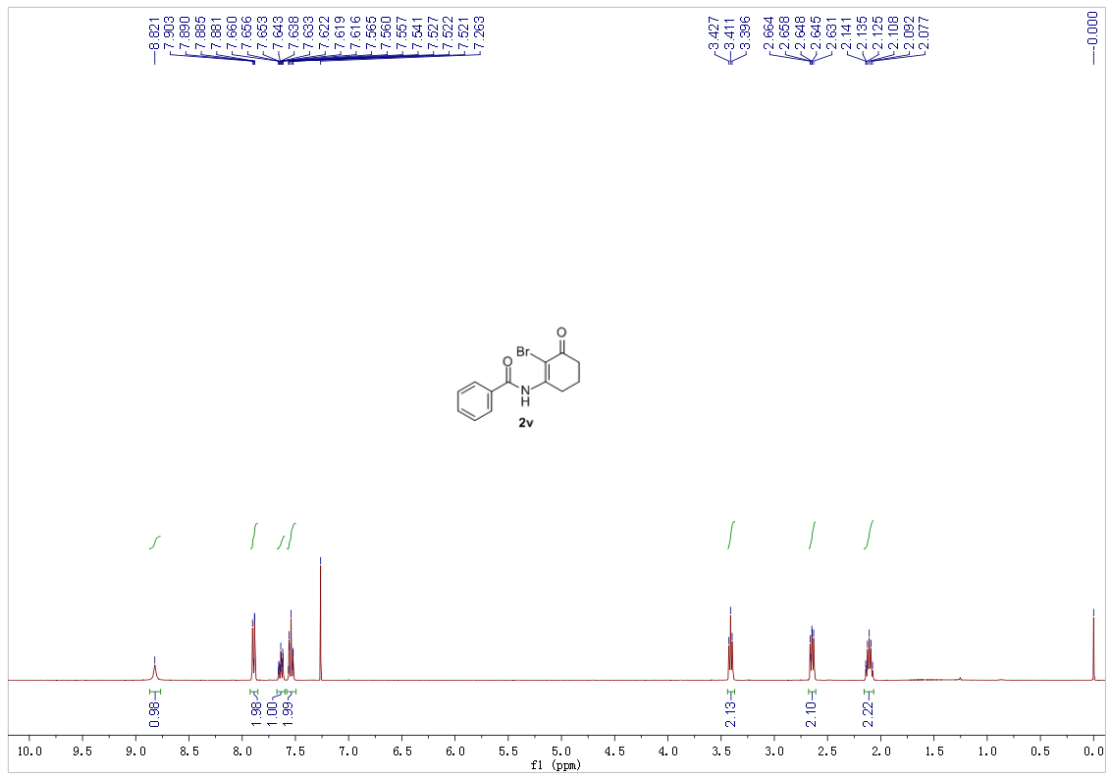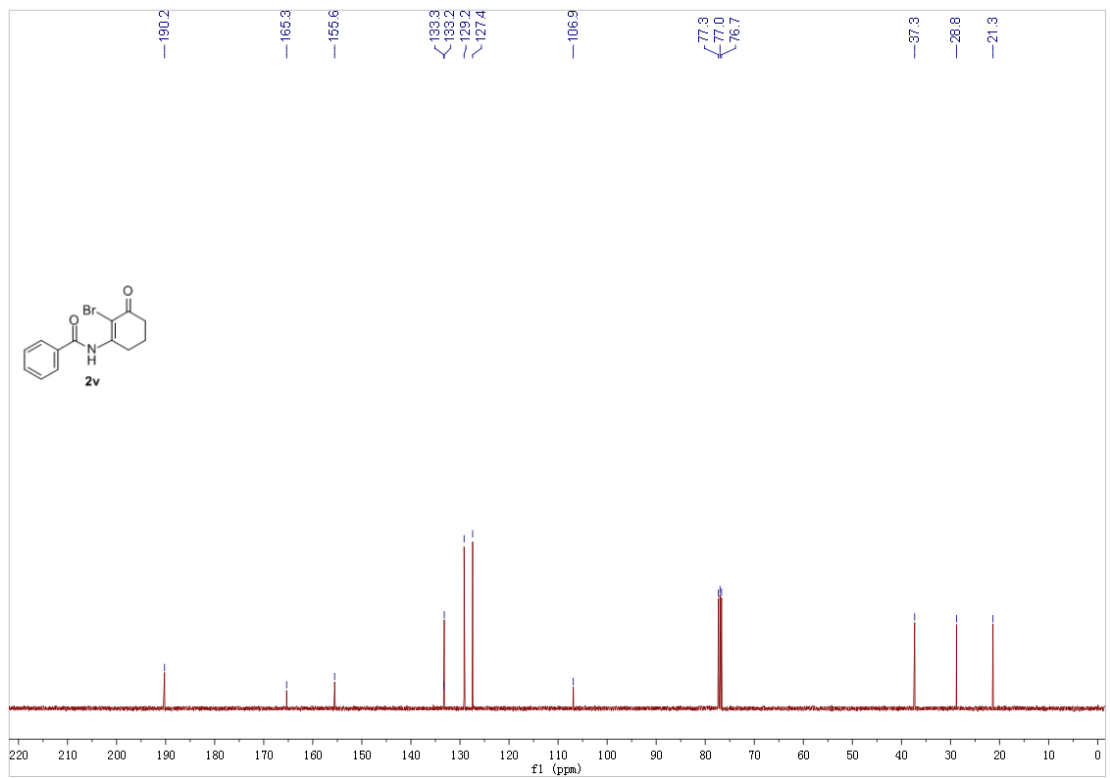

## 2. $^1\text{H}$ NMR and $^{13}\text{C}$ NMR spectra of oxazoles 1

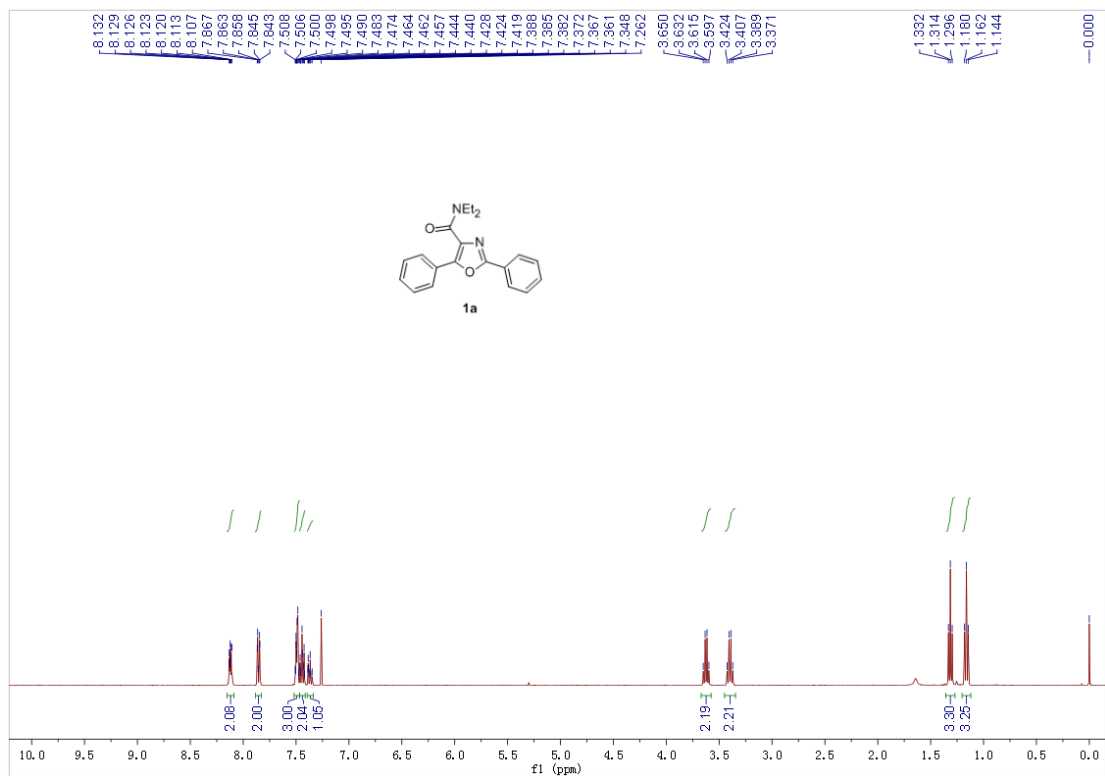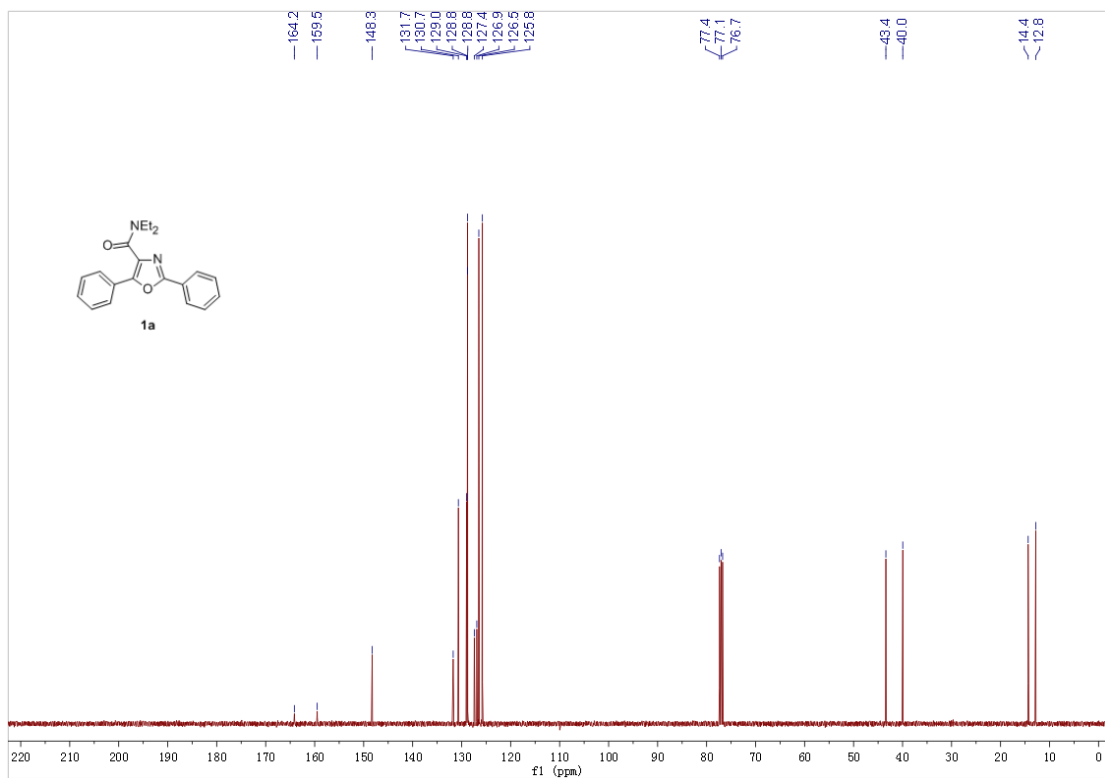



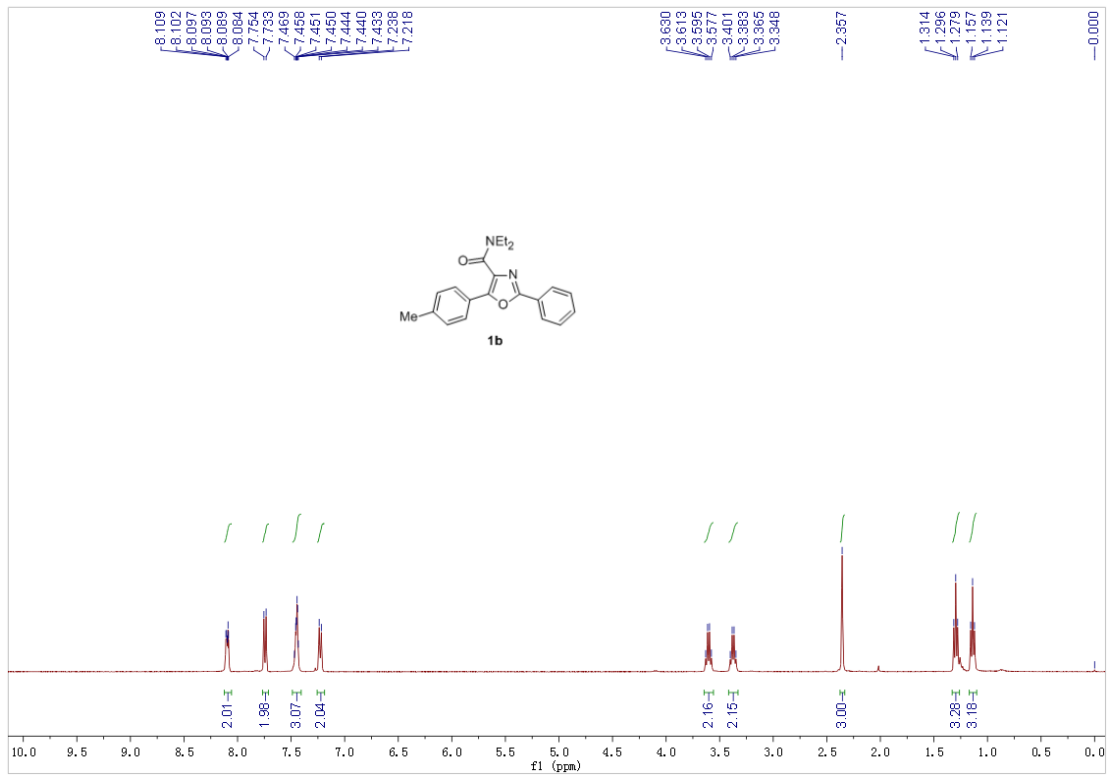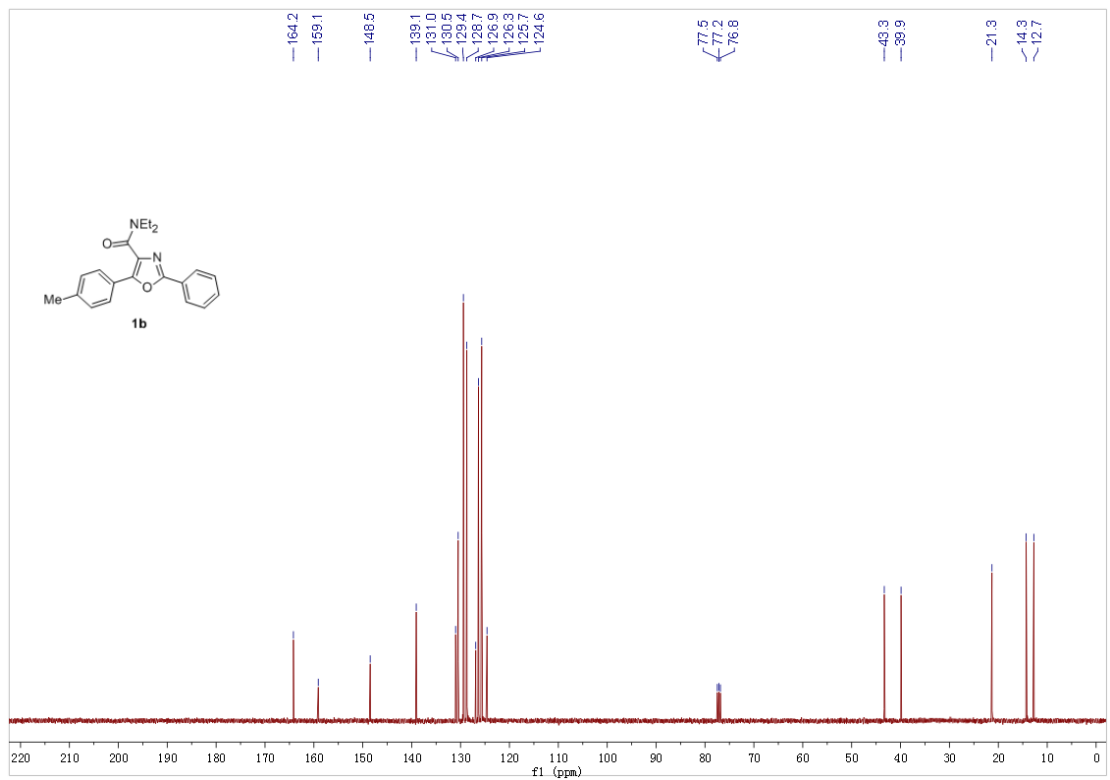

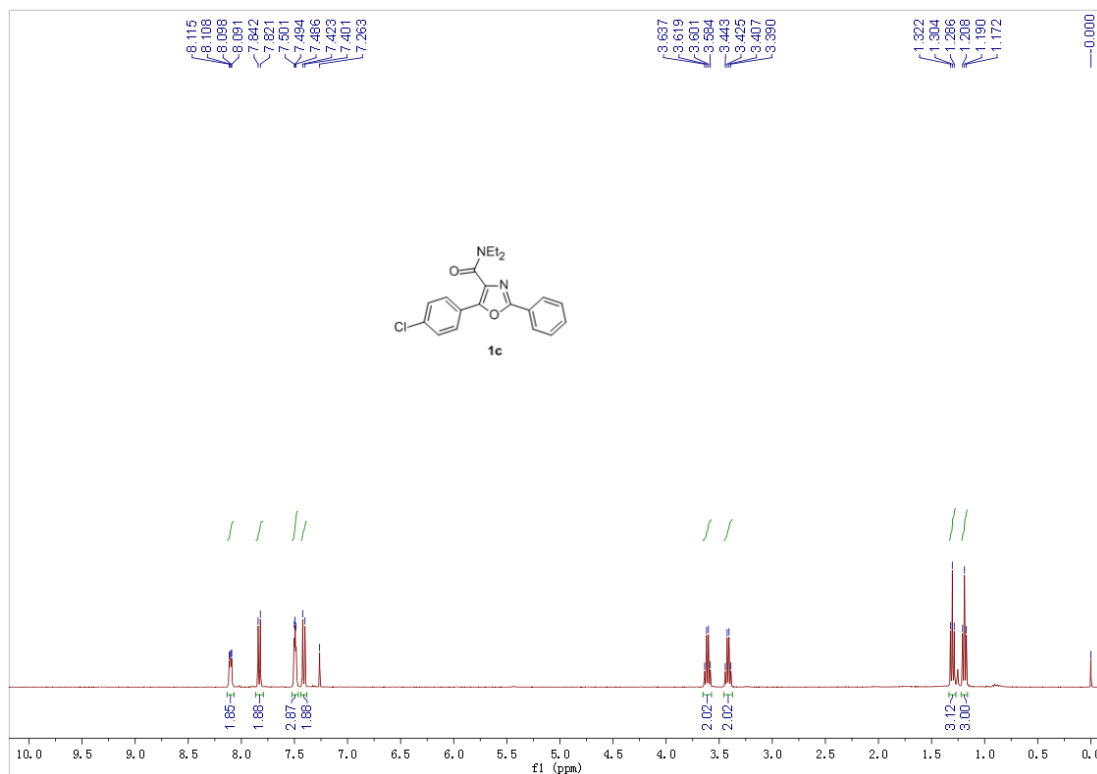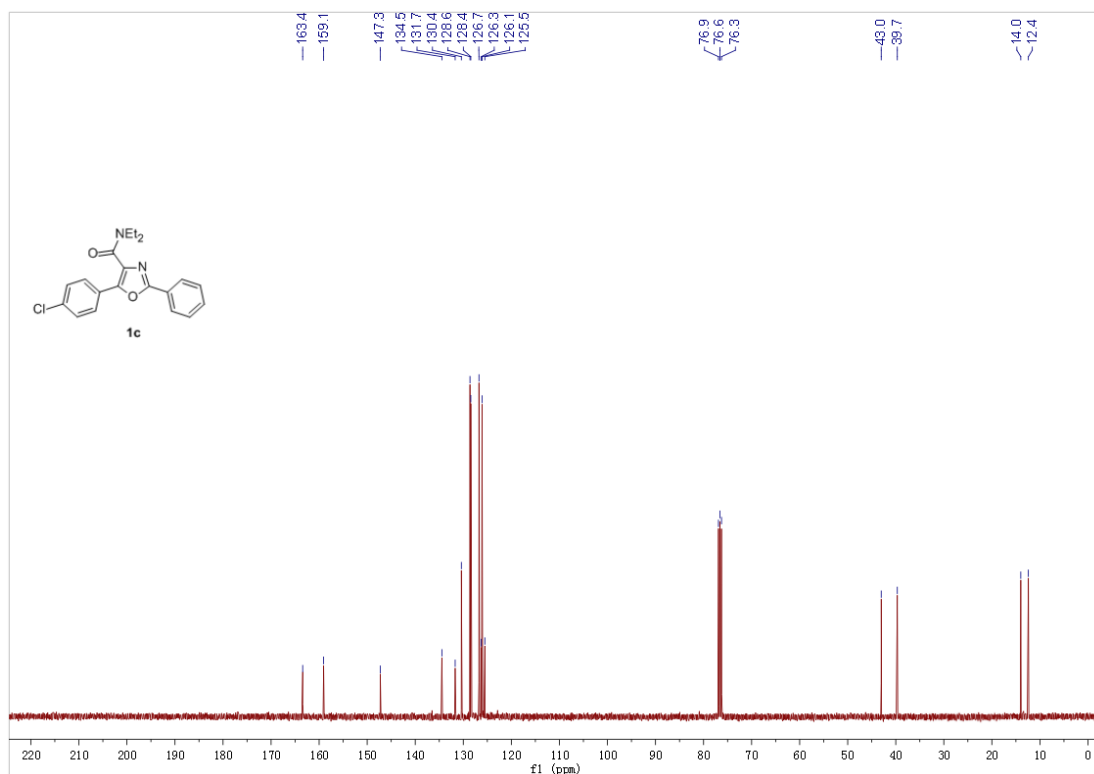

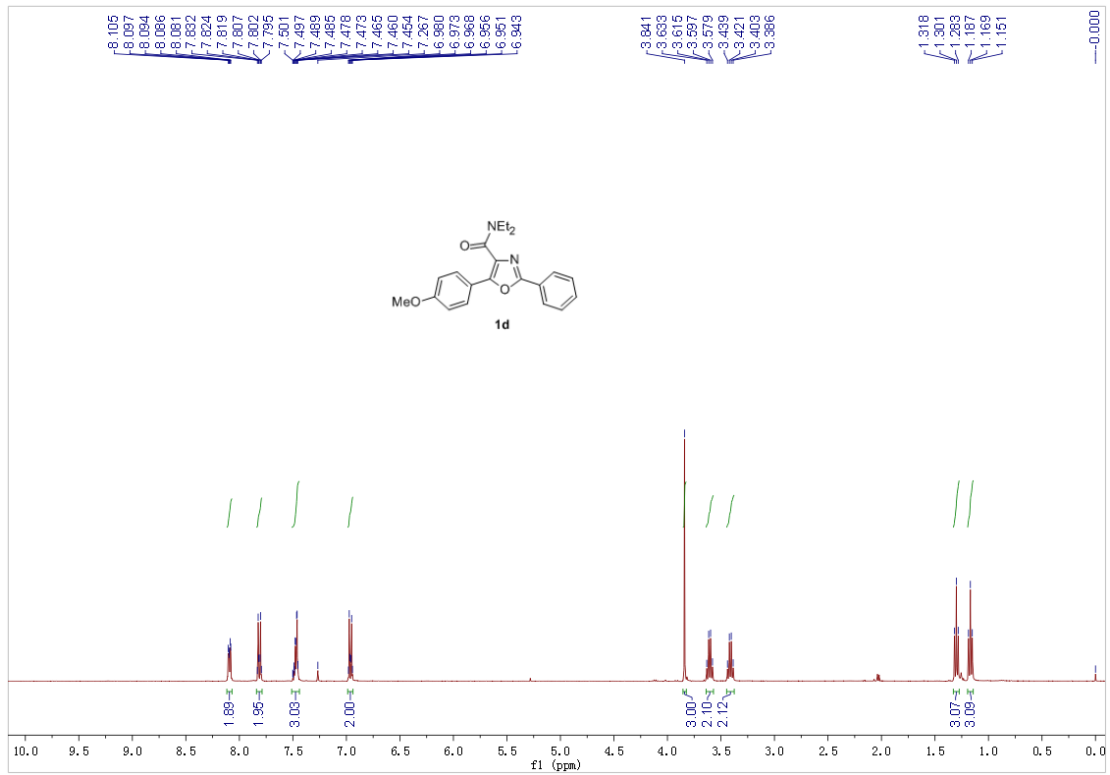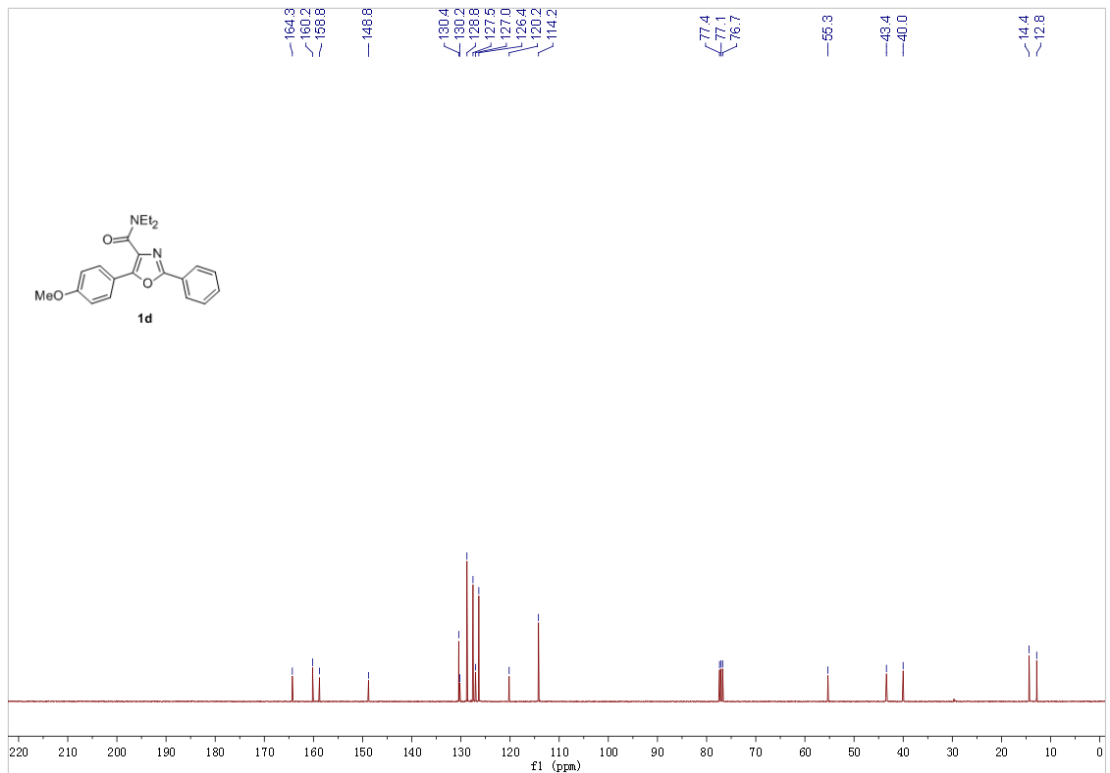

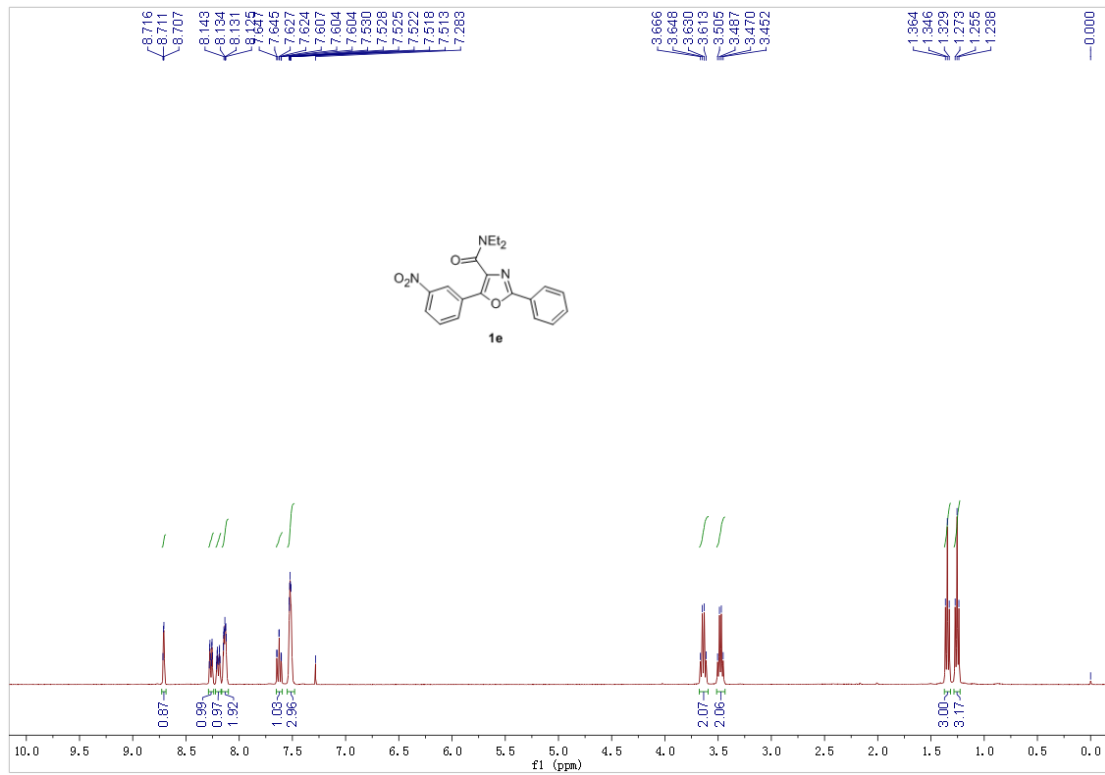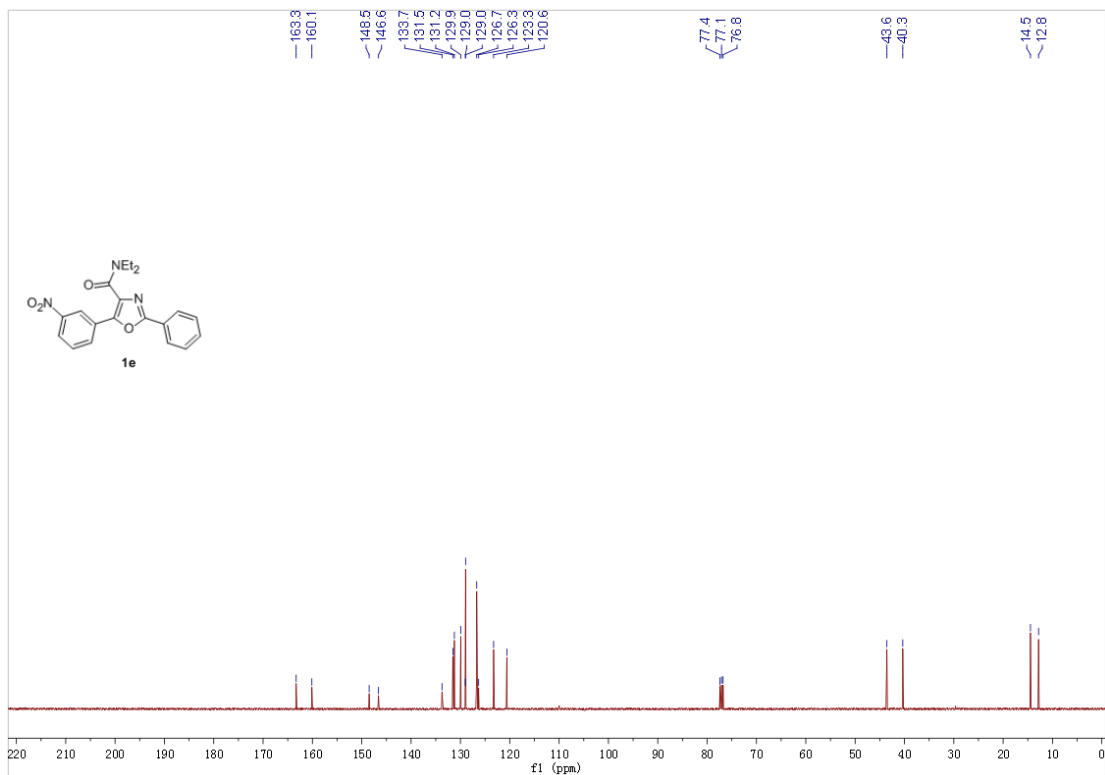

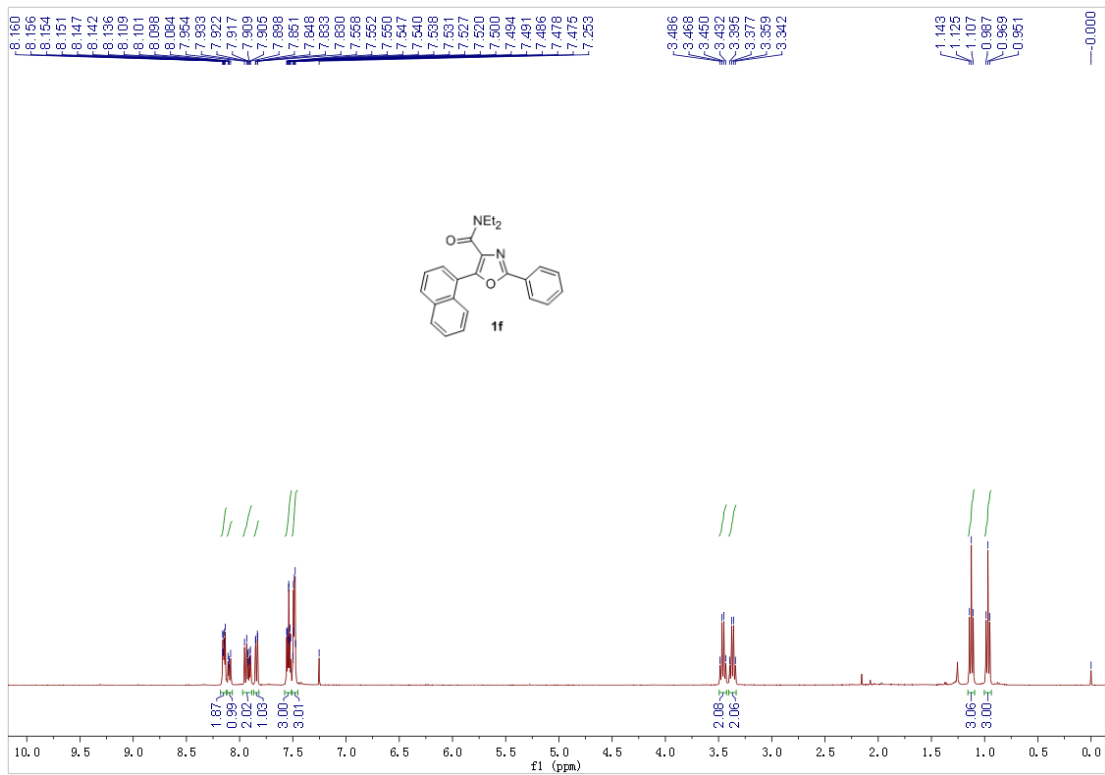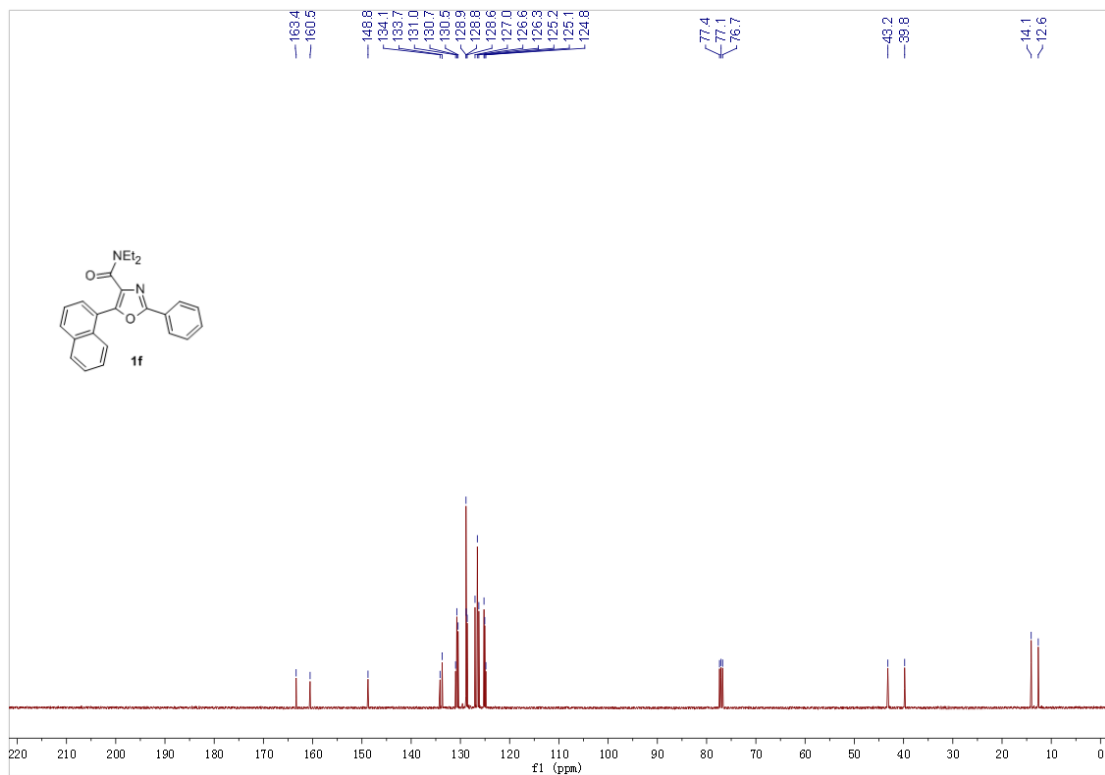

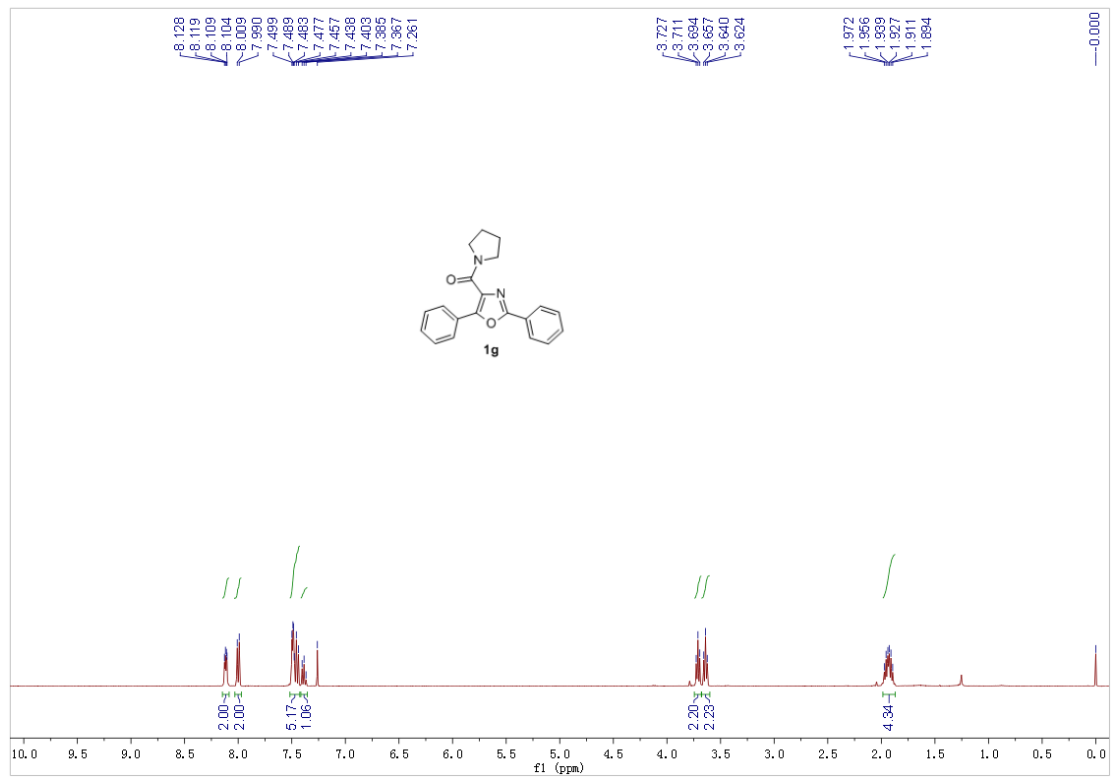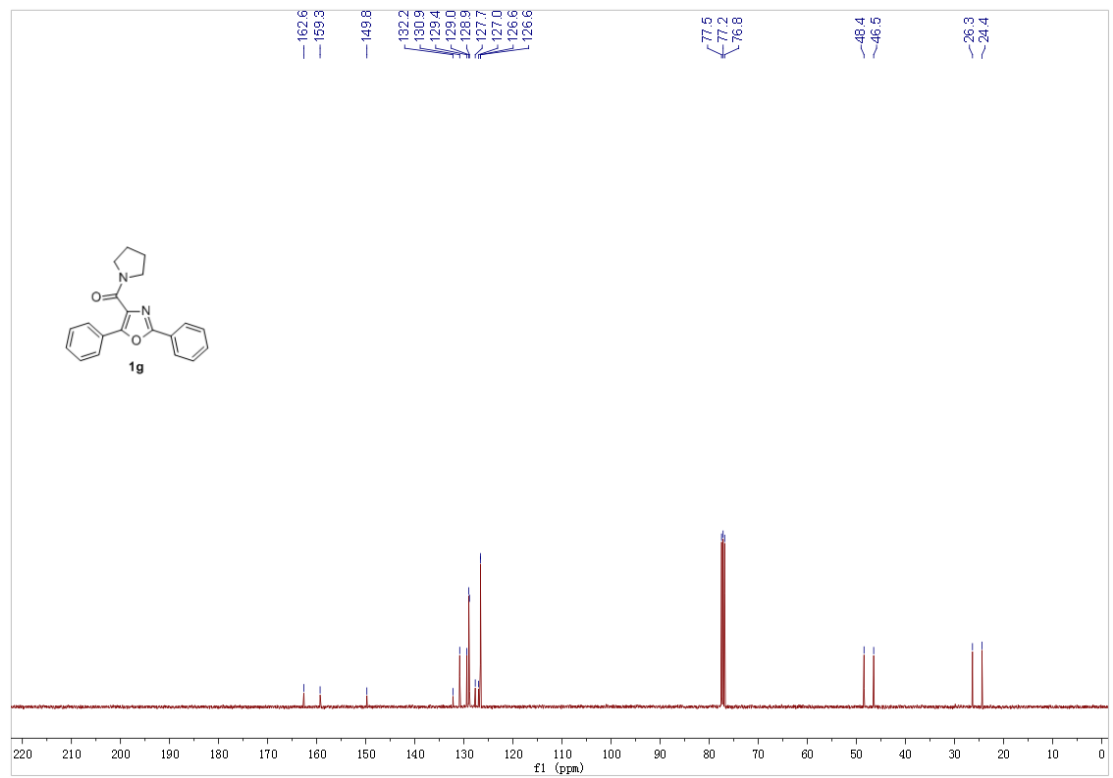

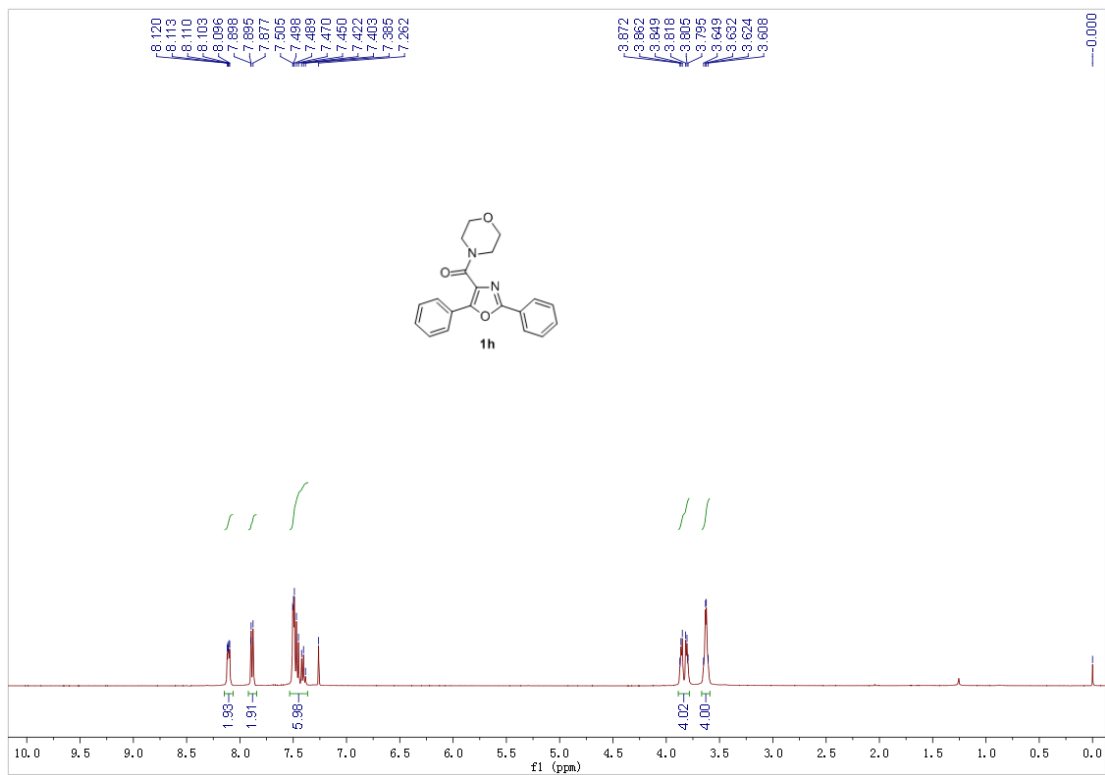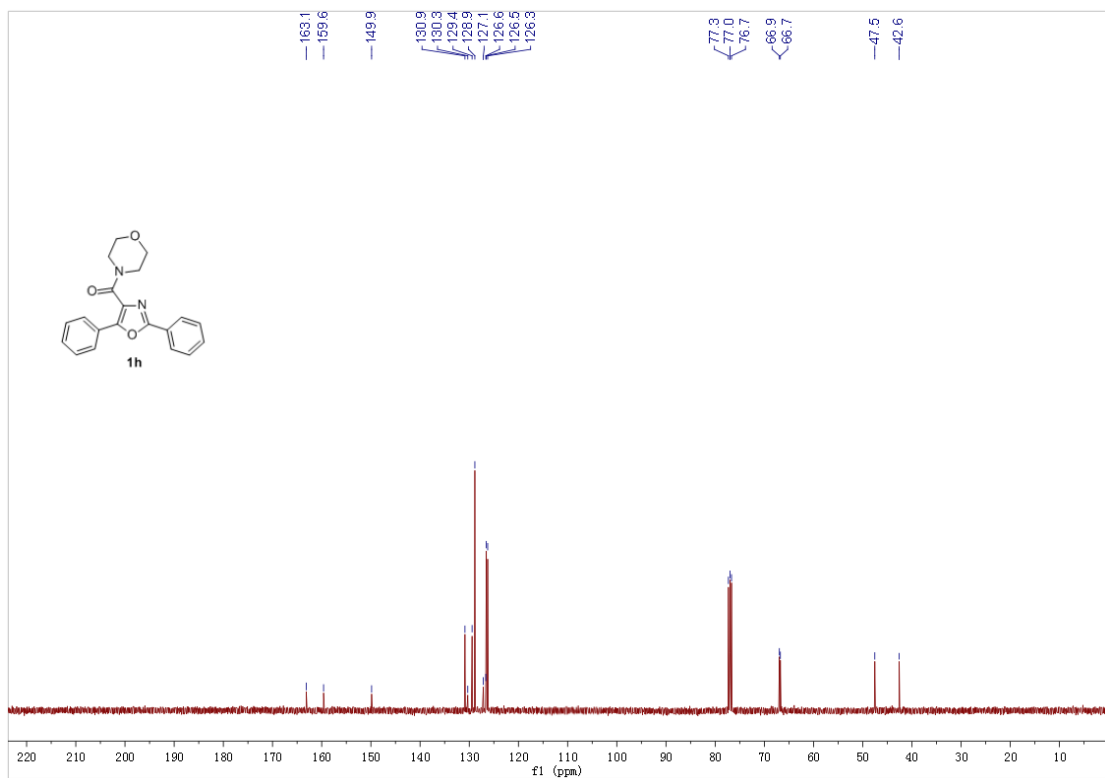

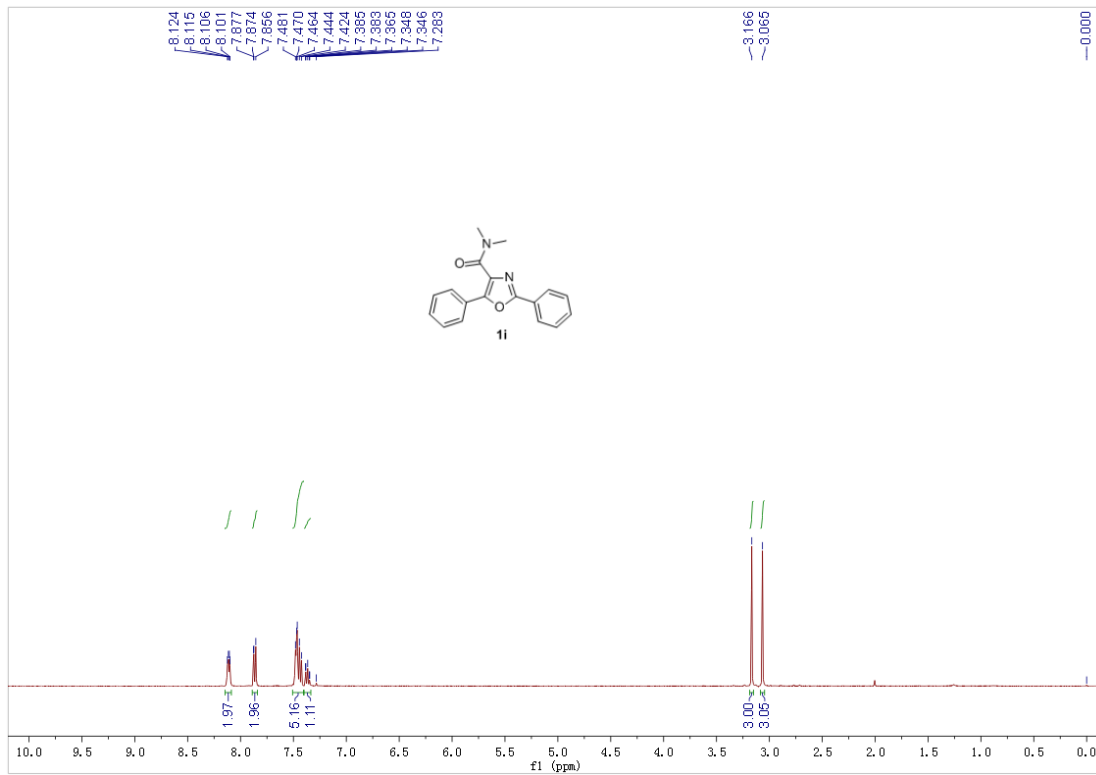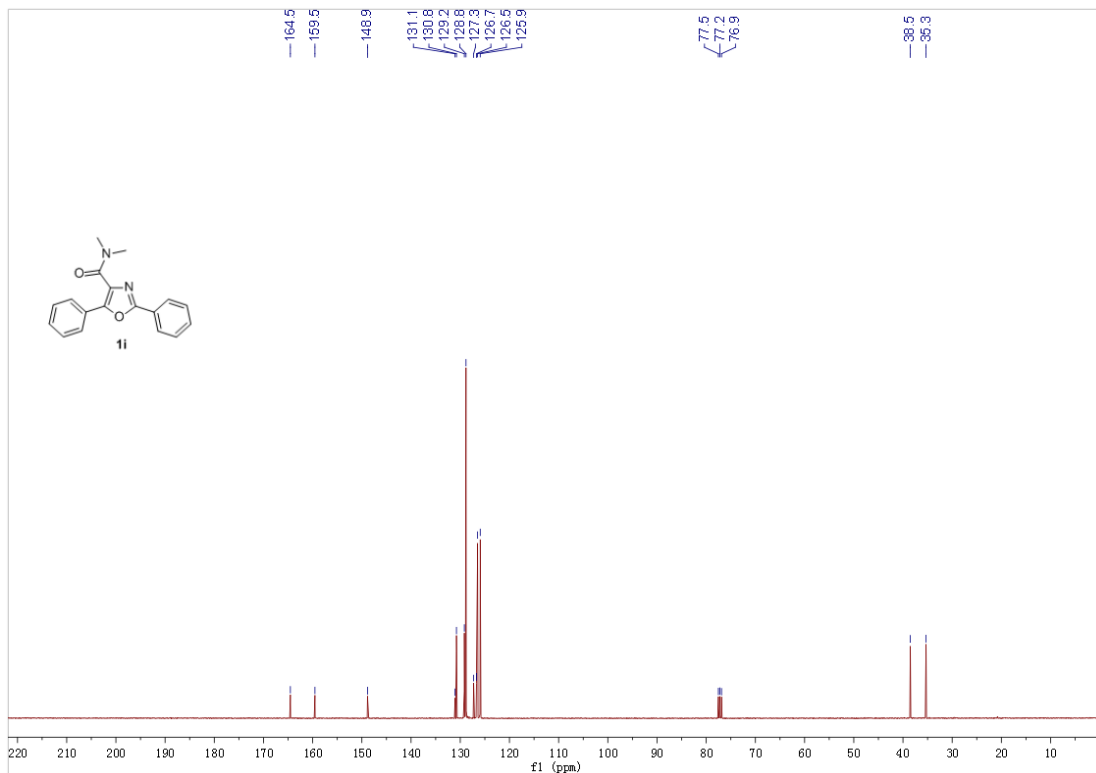



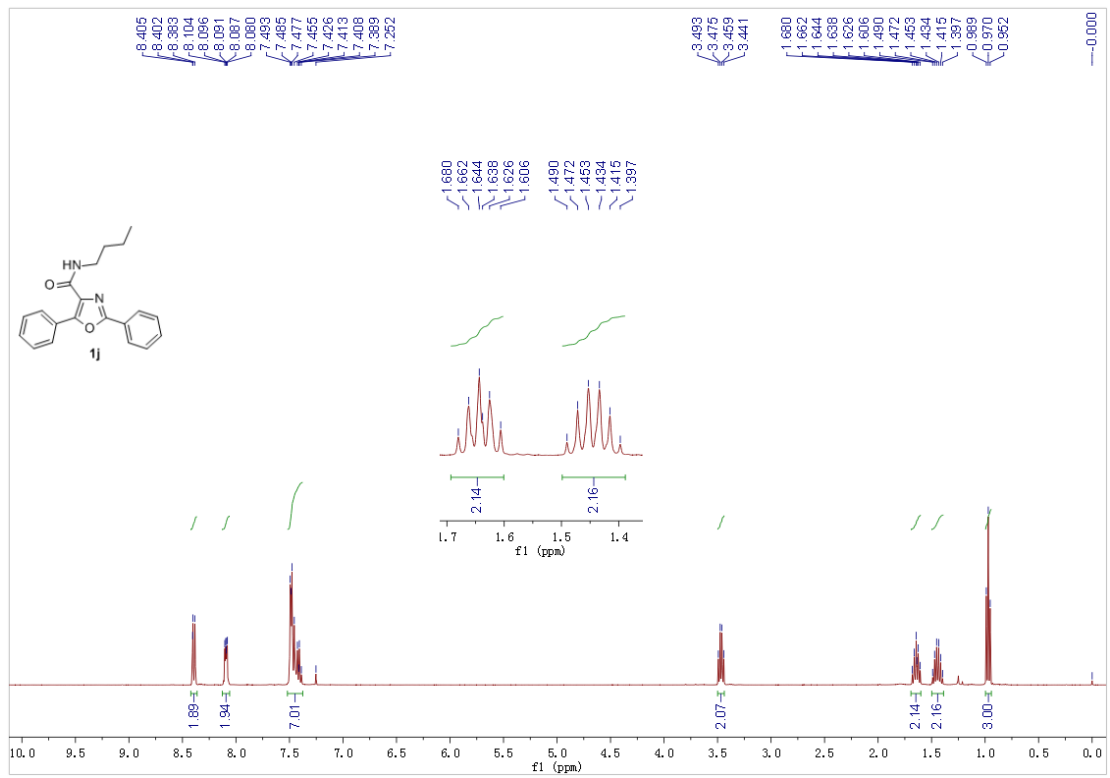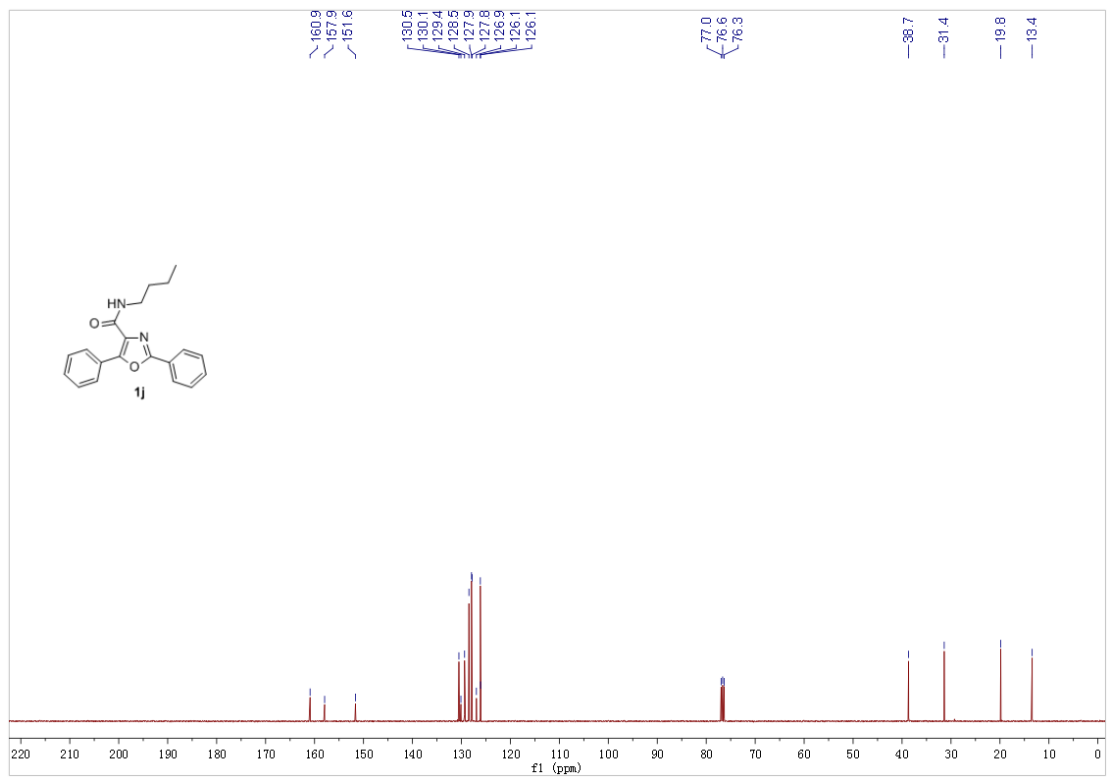

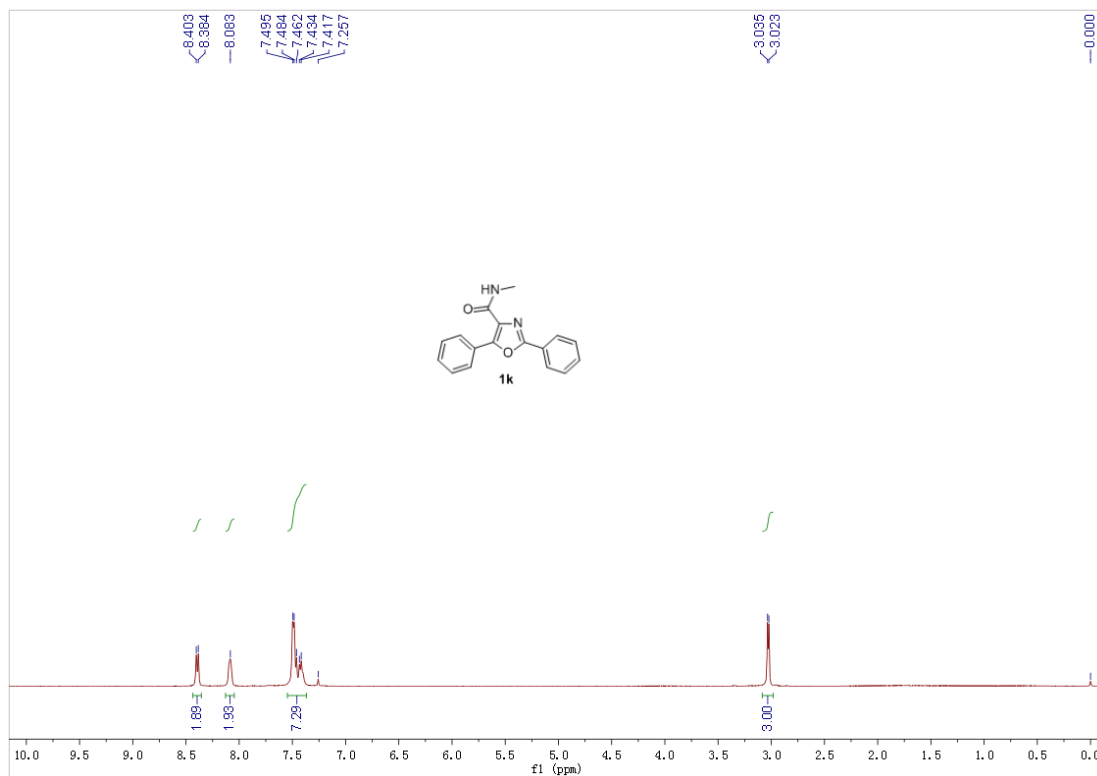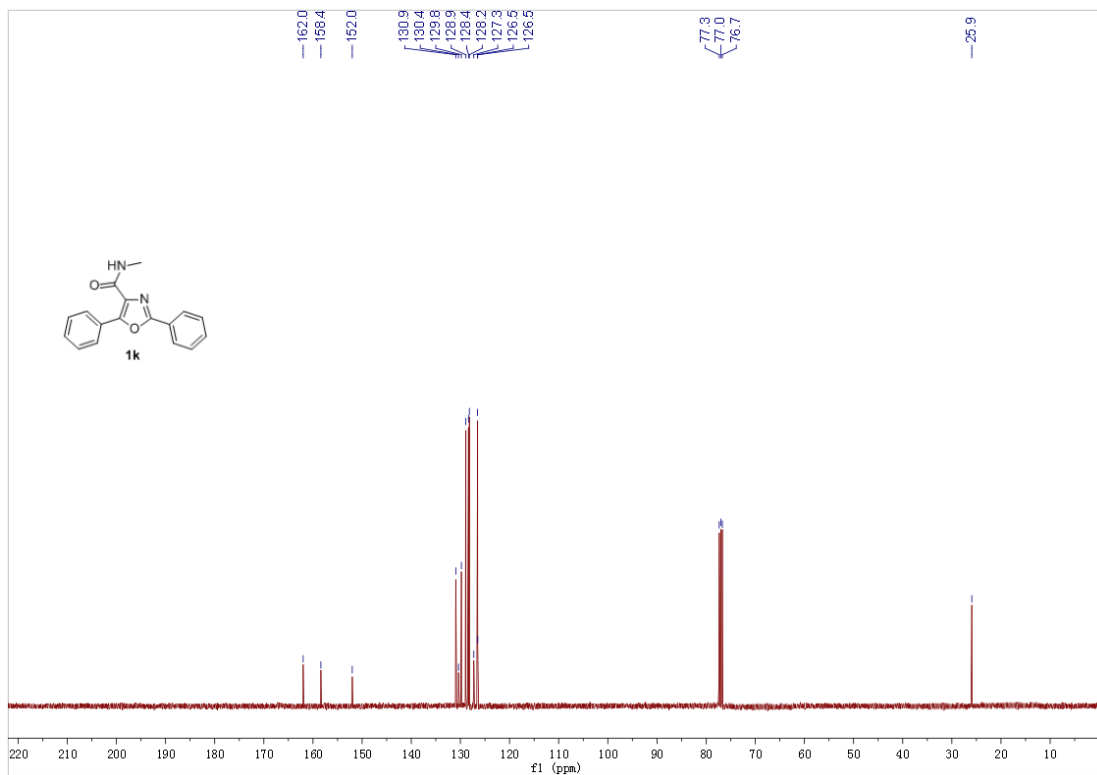

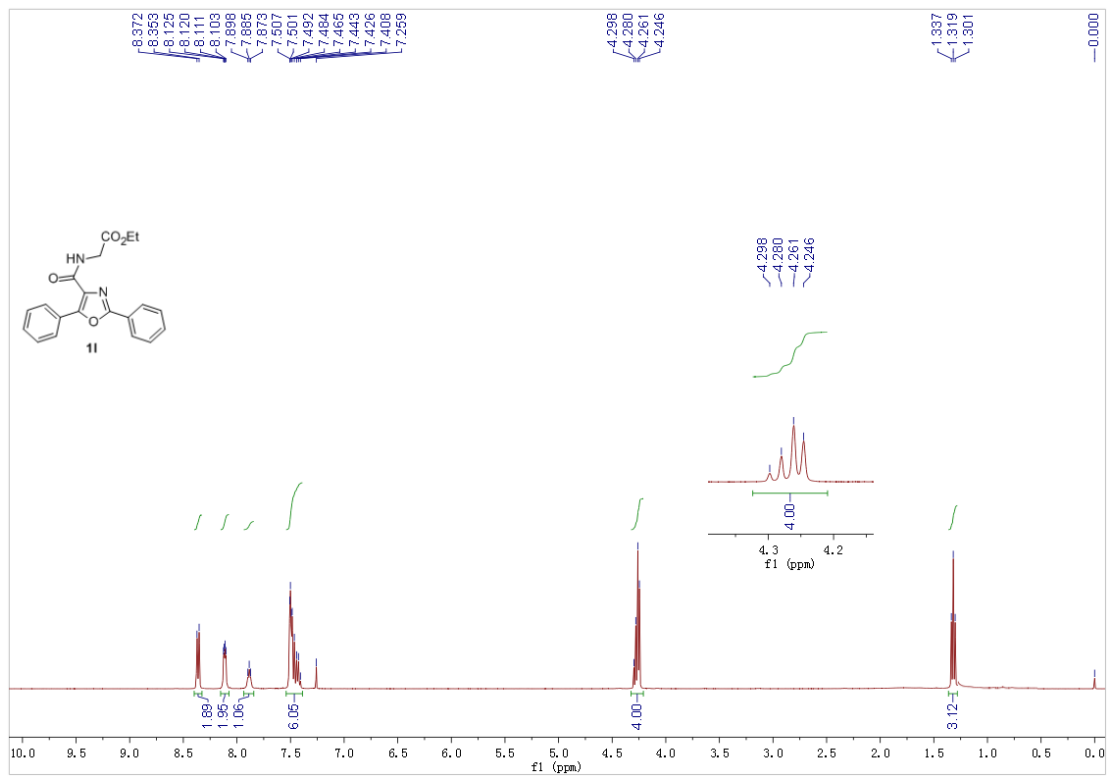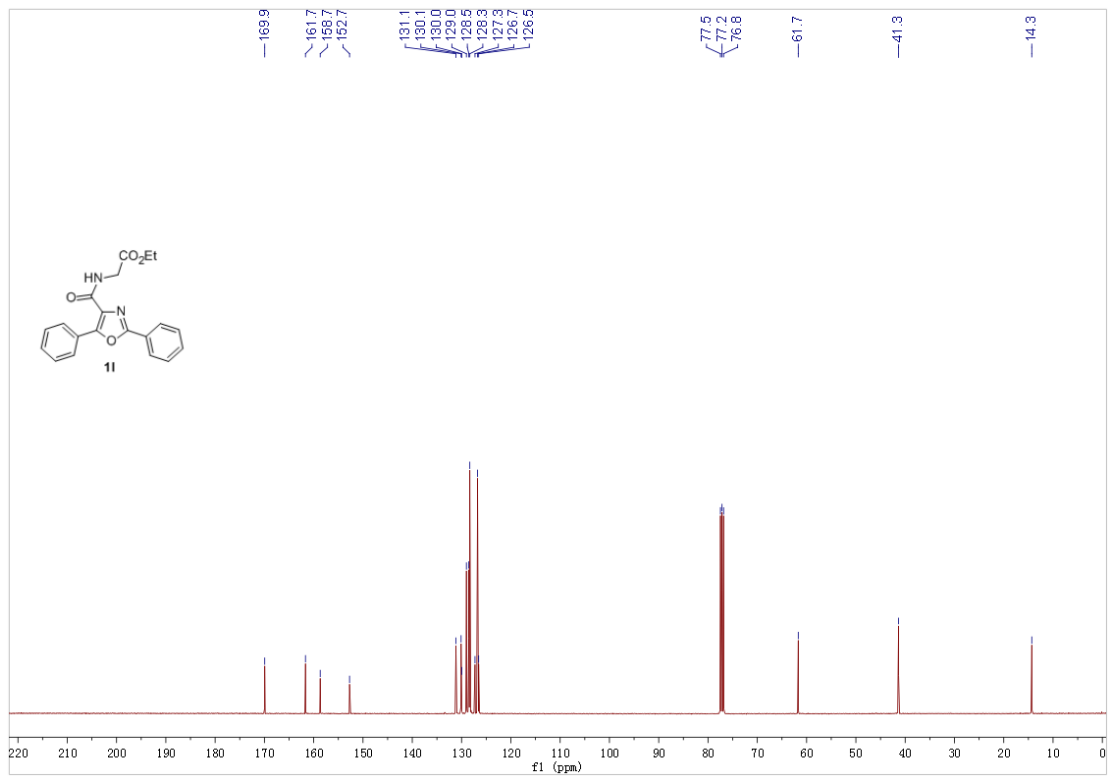

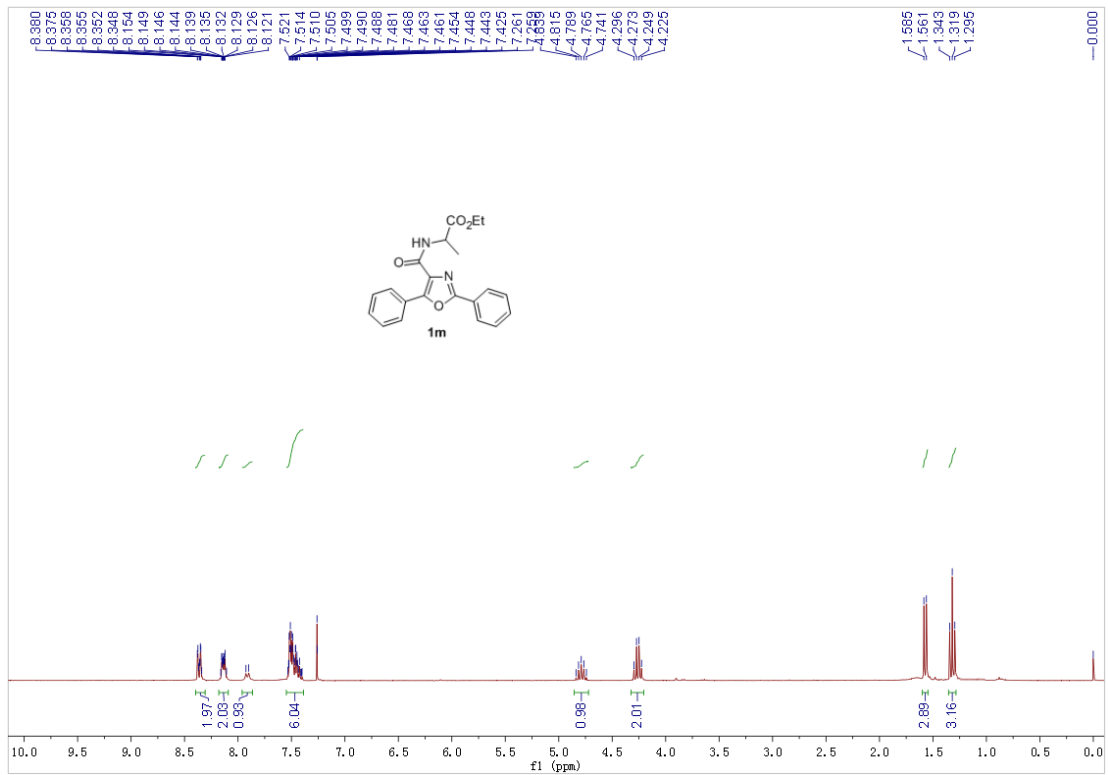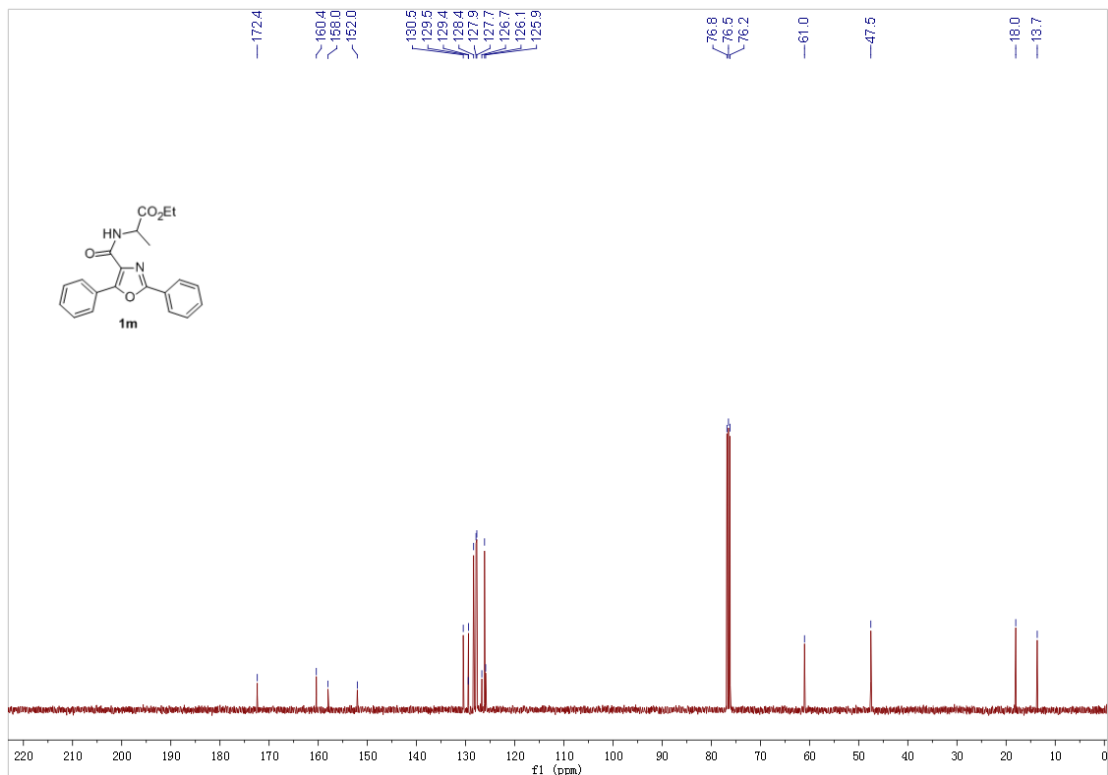

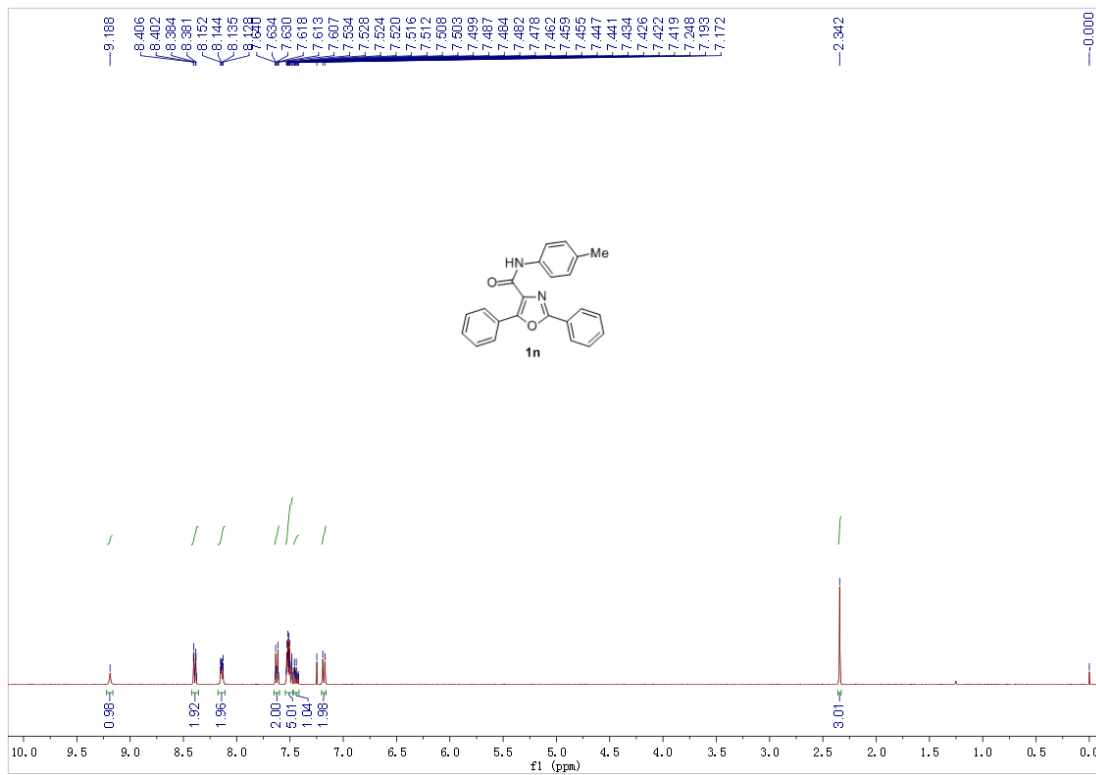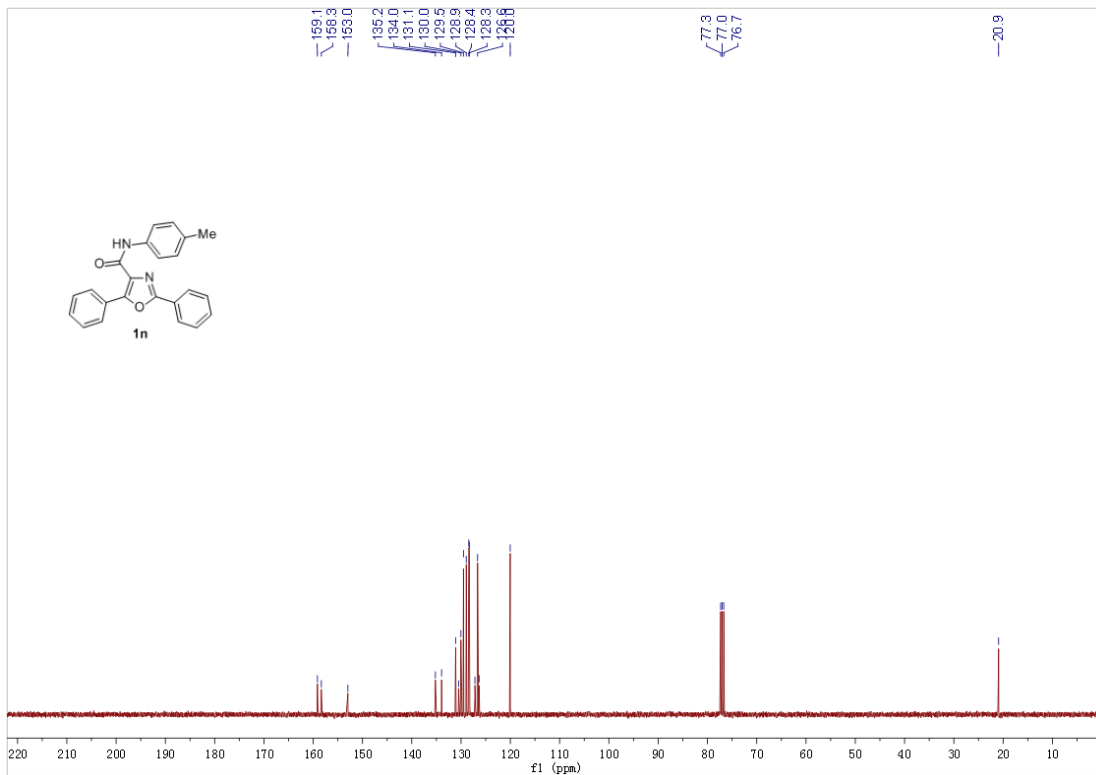

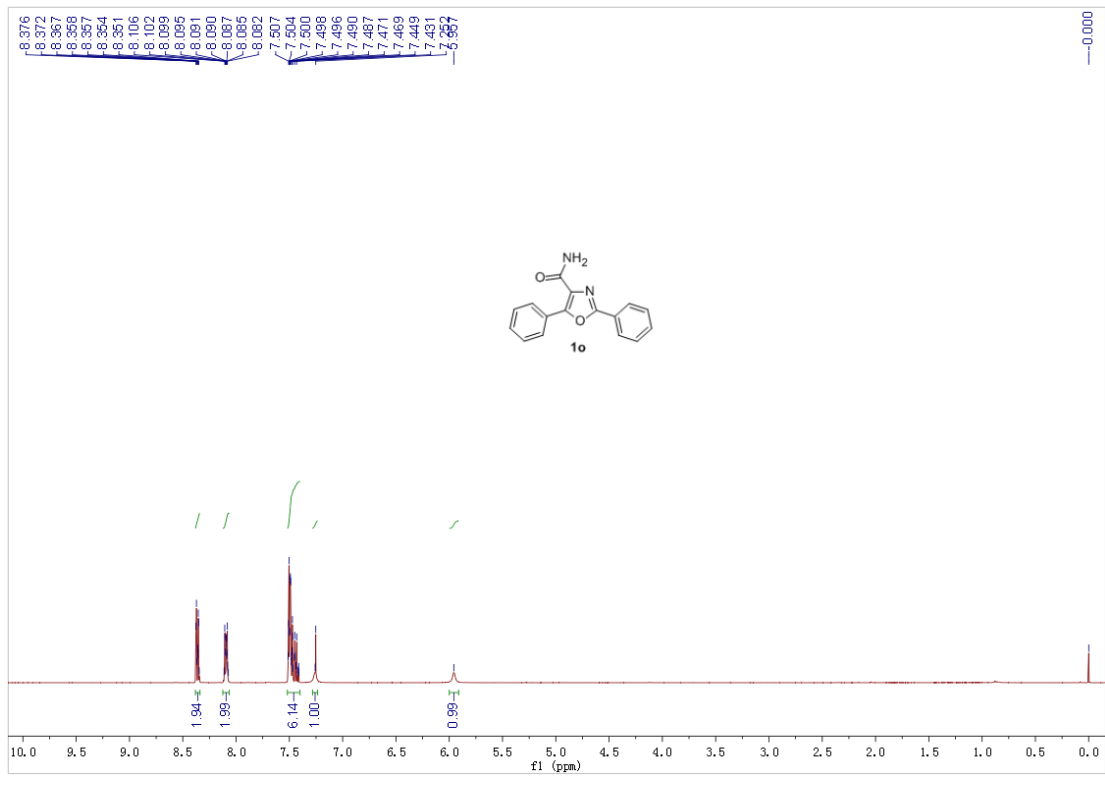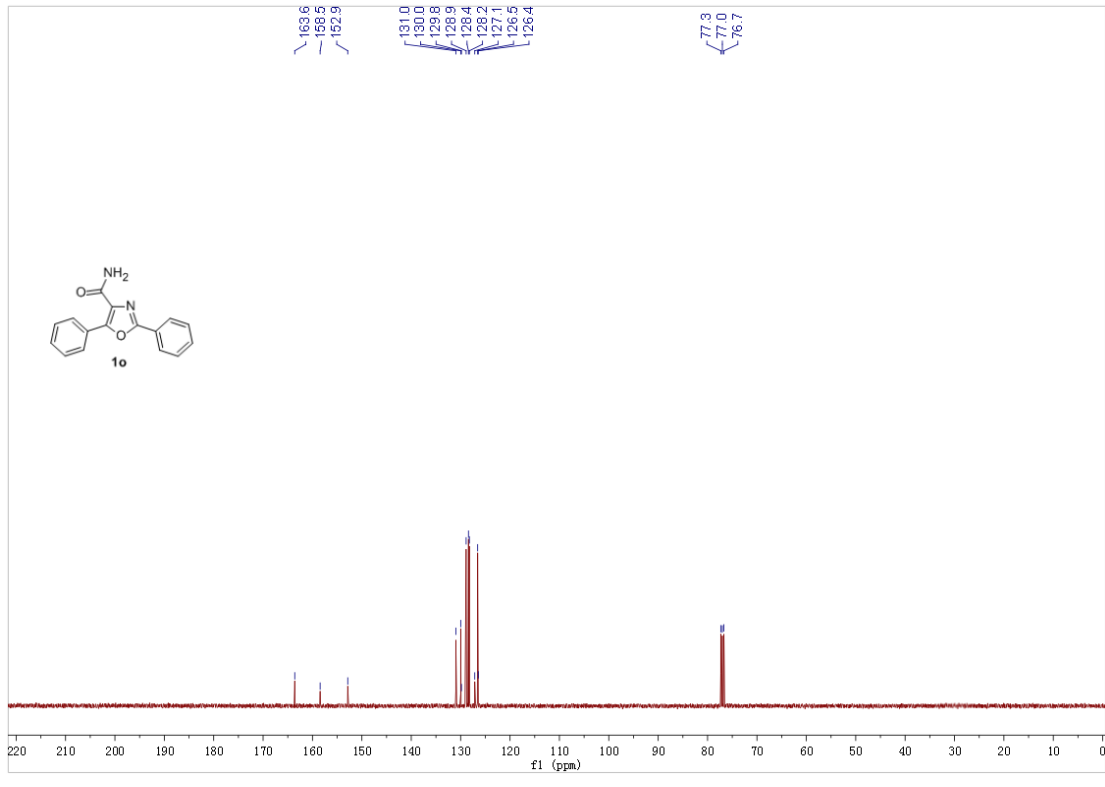

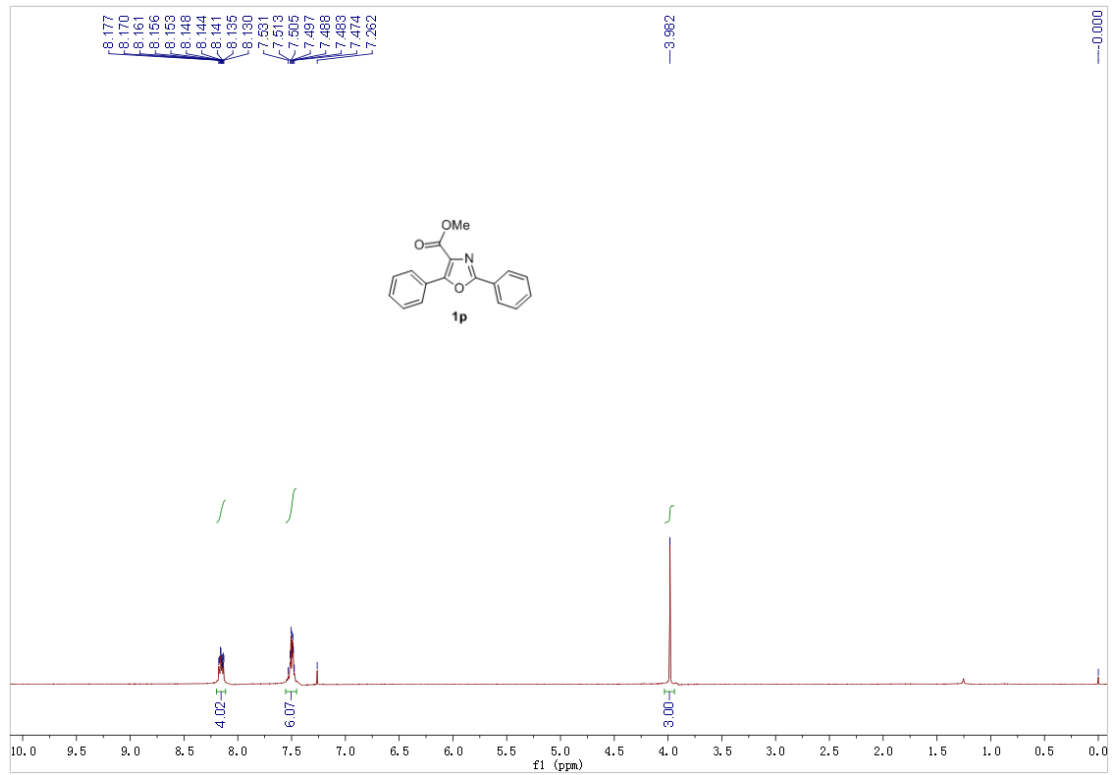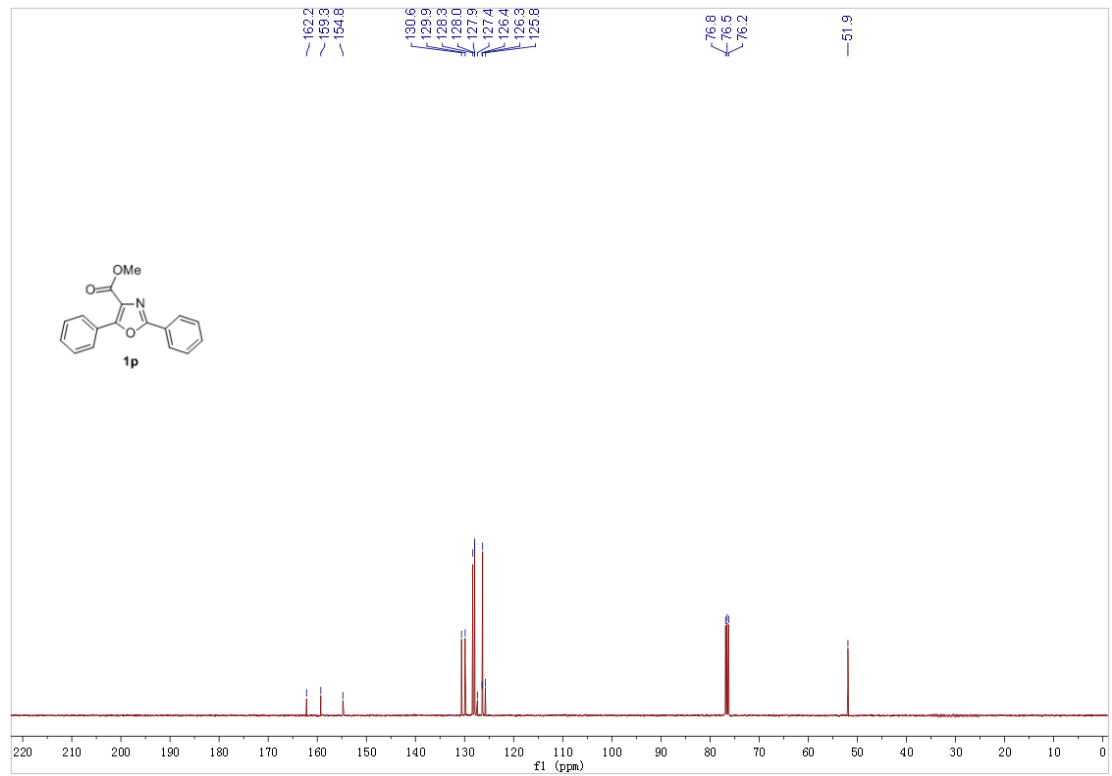

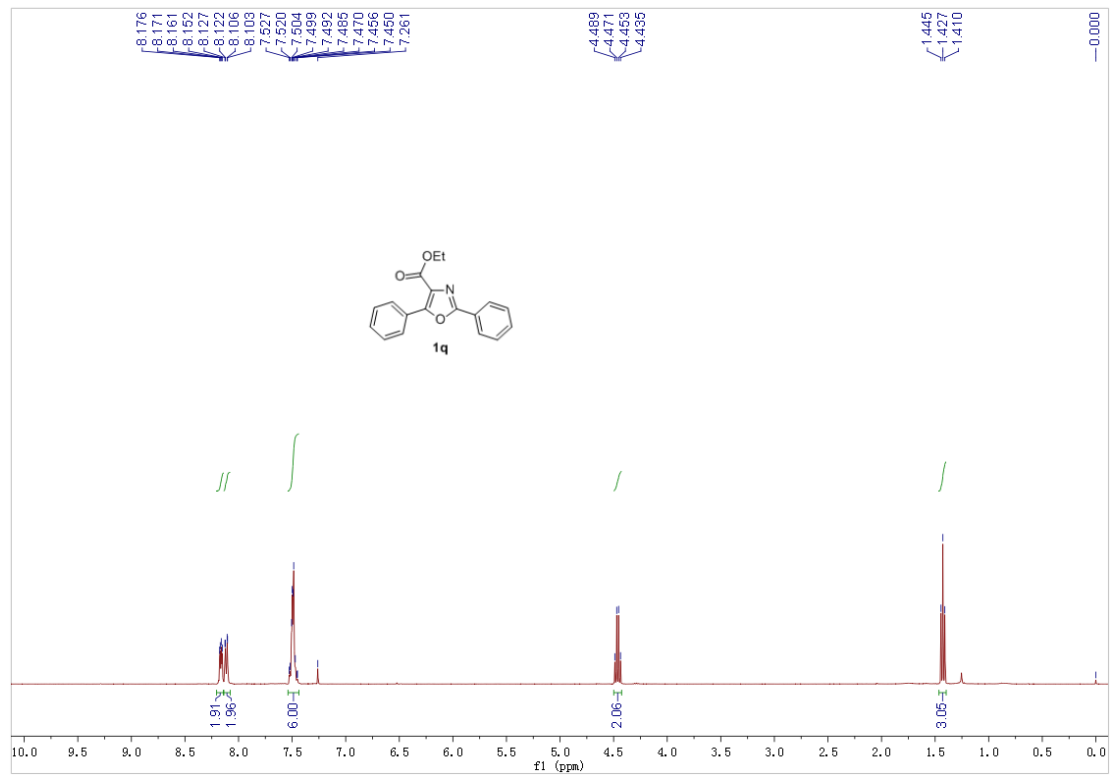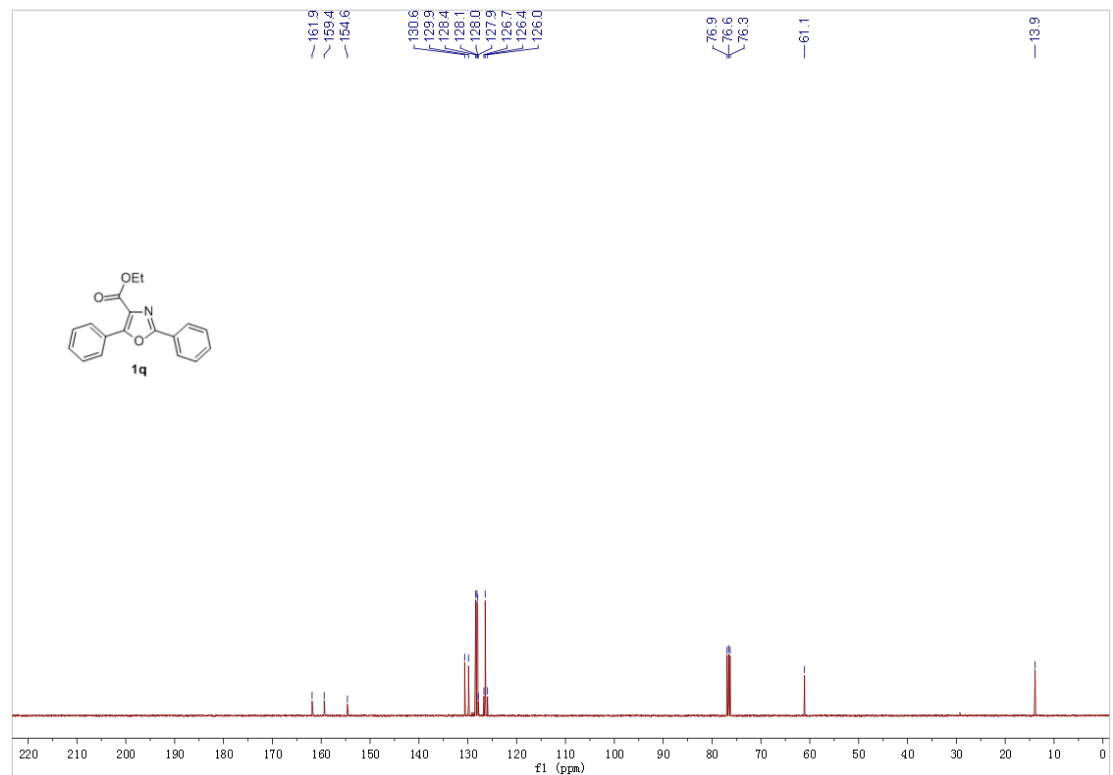



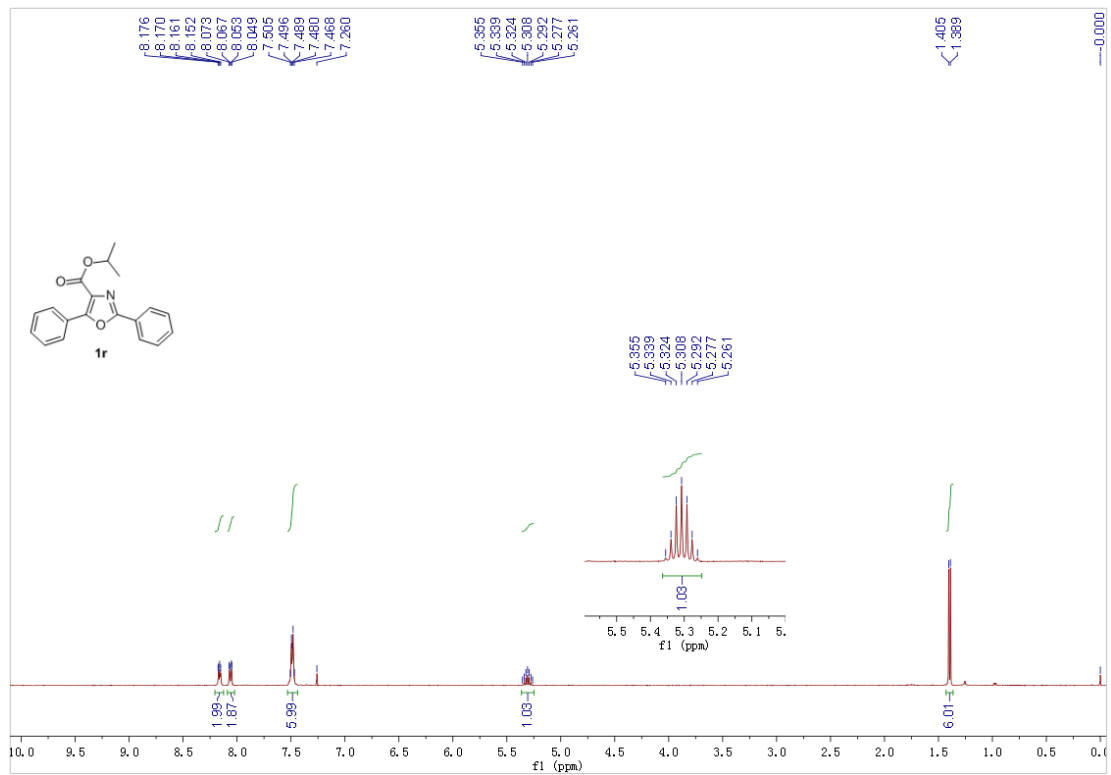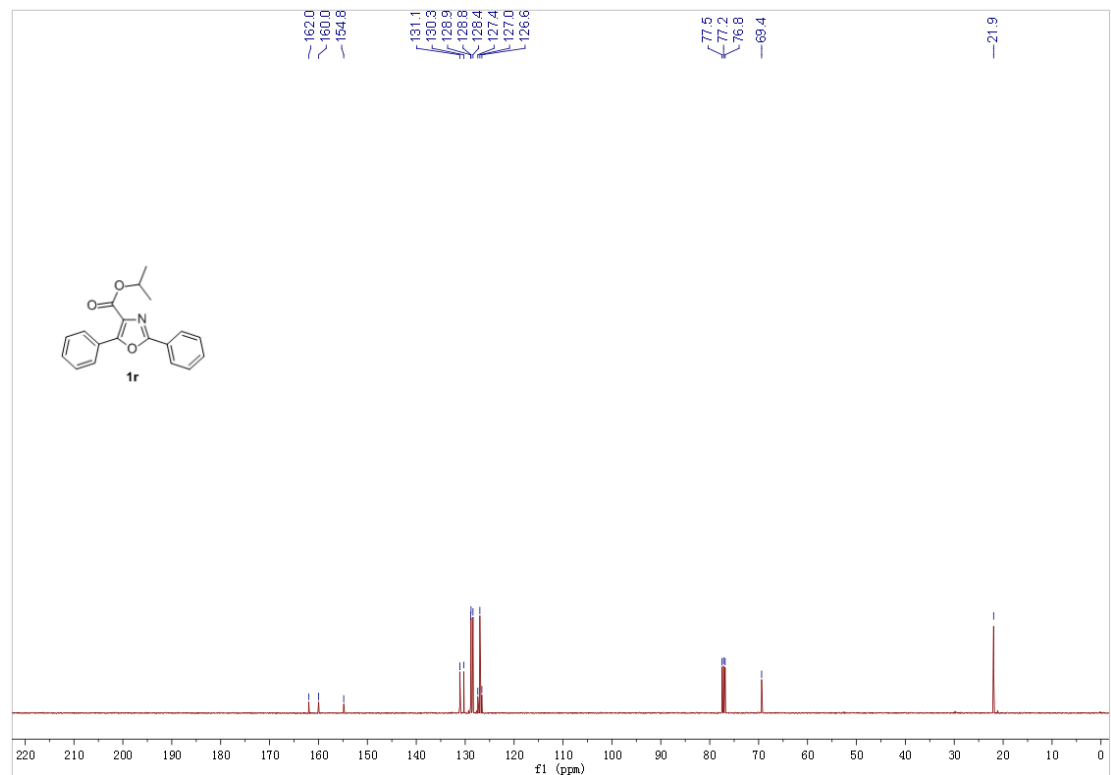

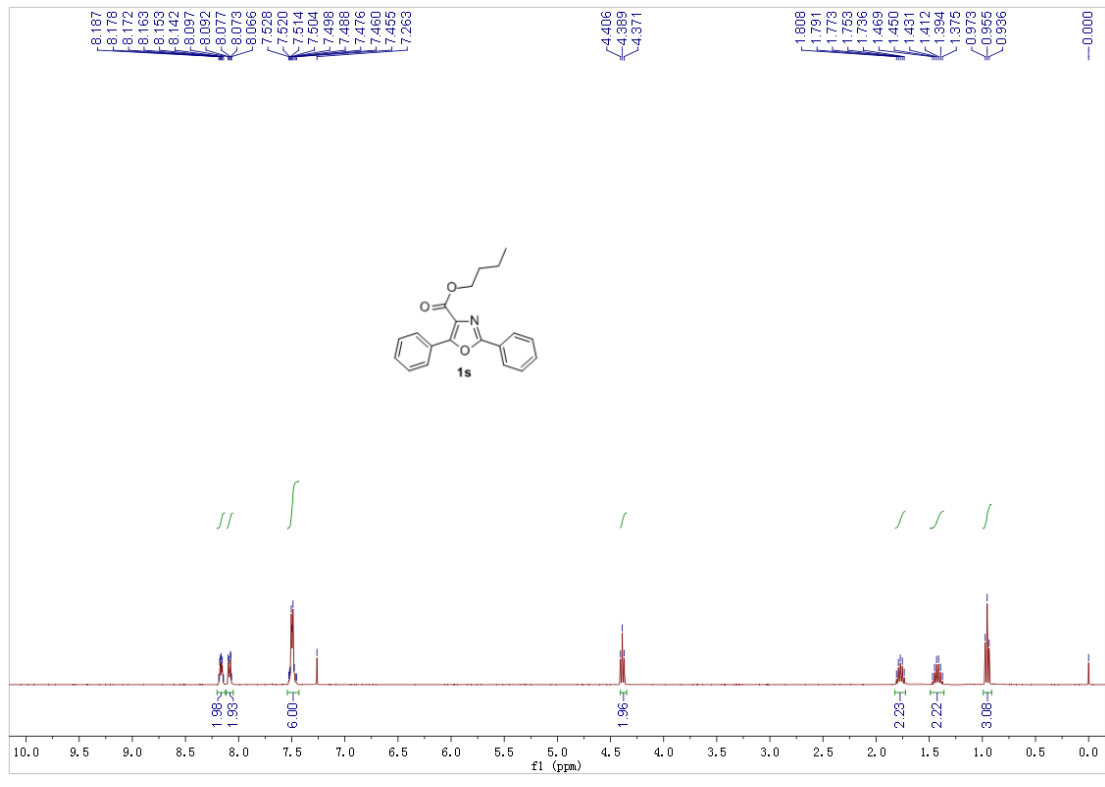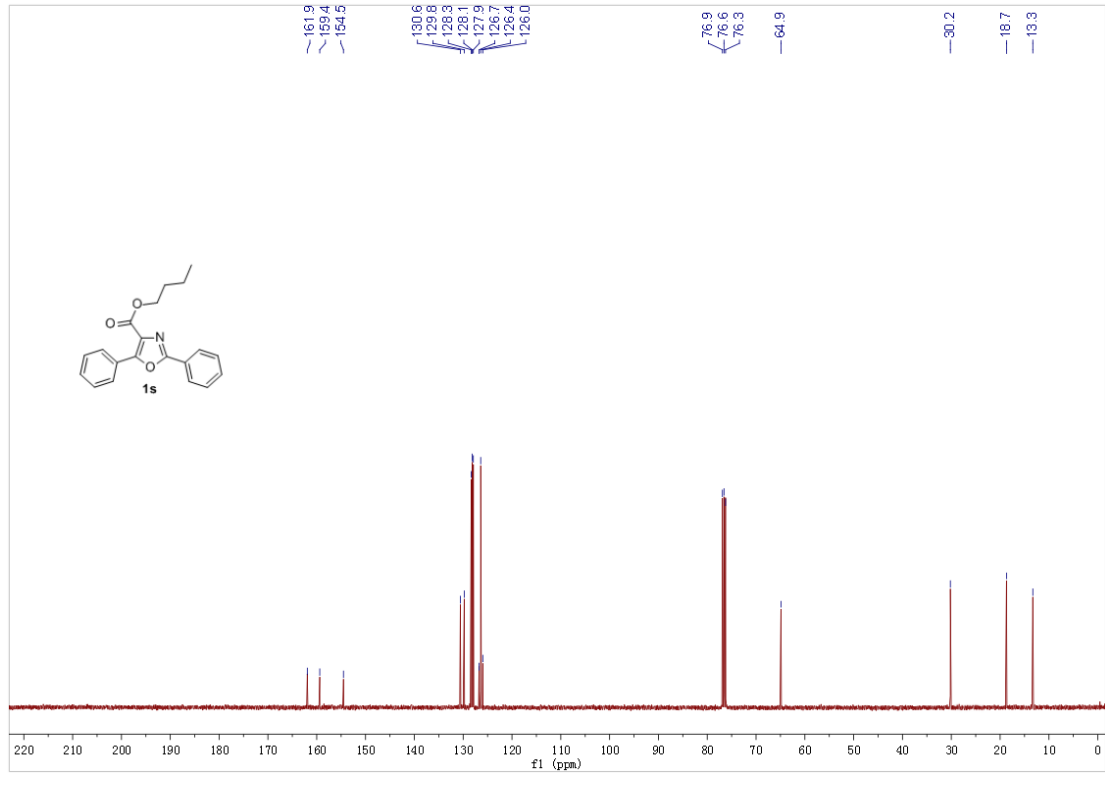

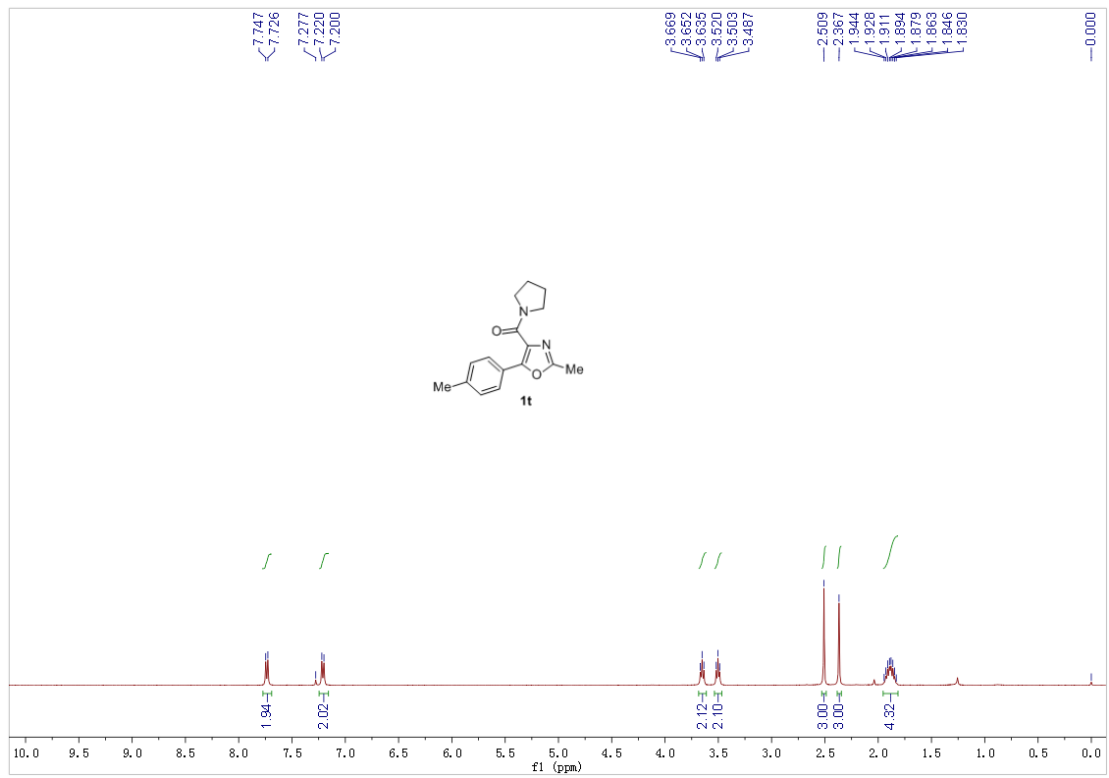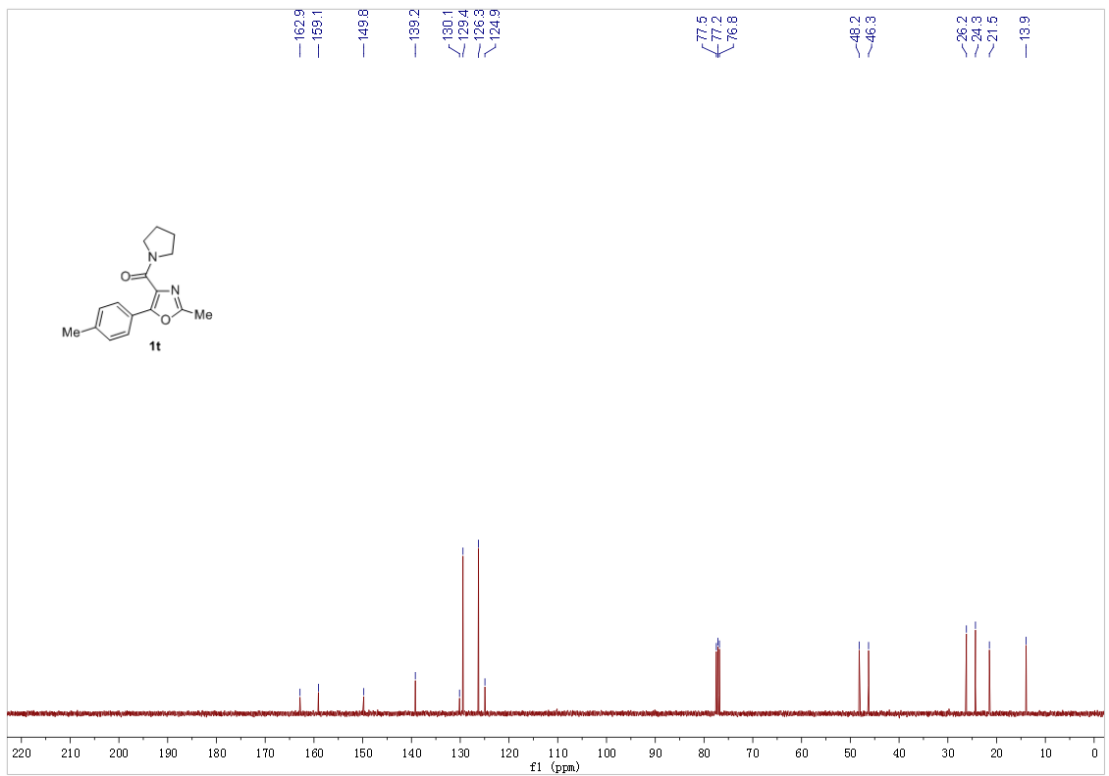

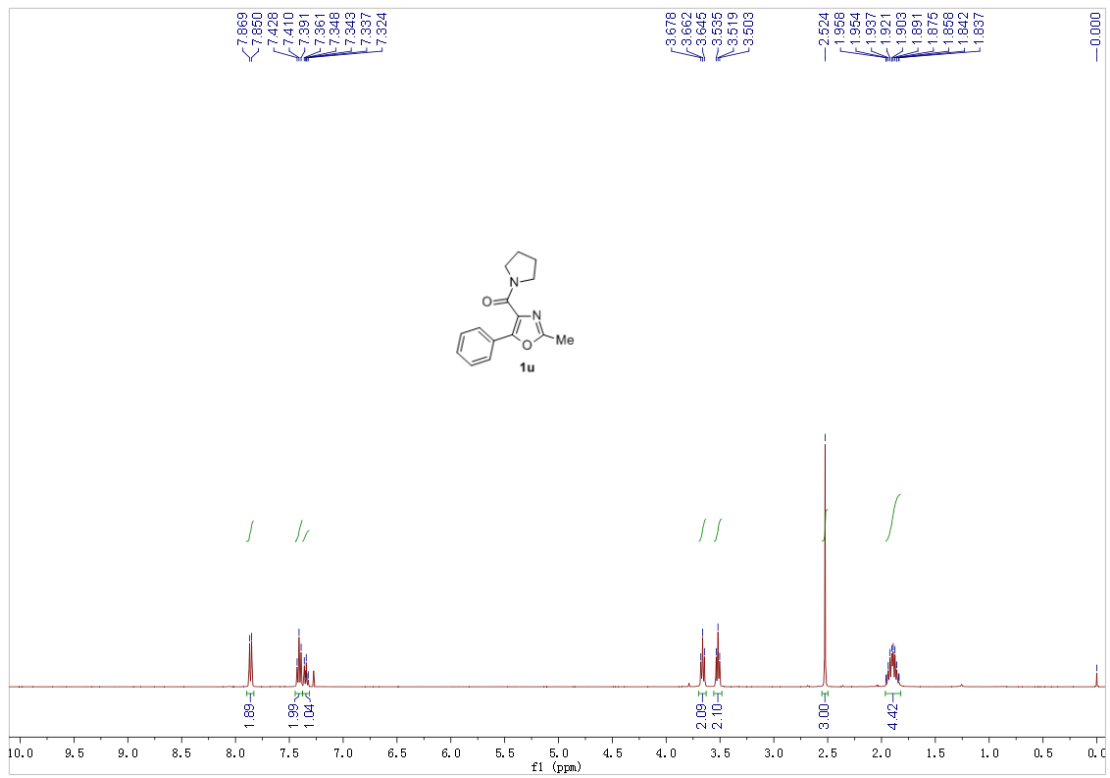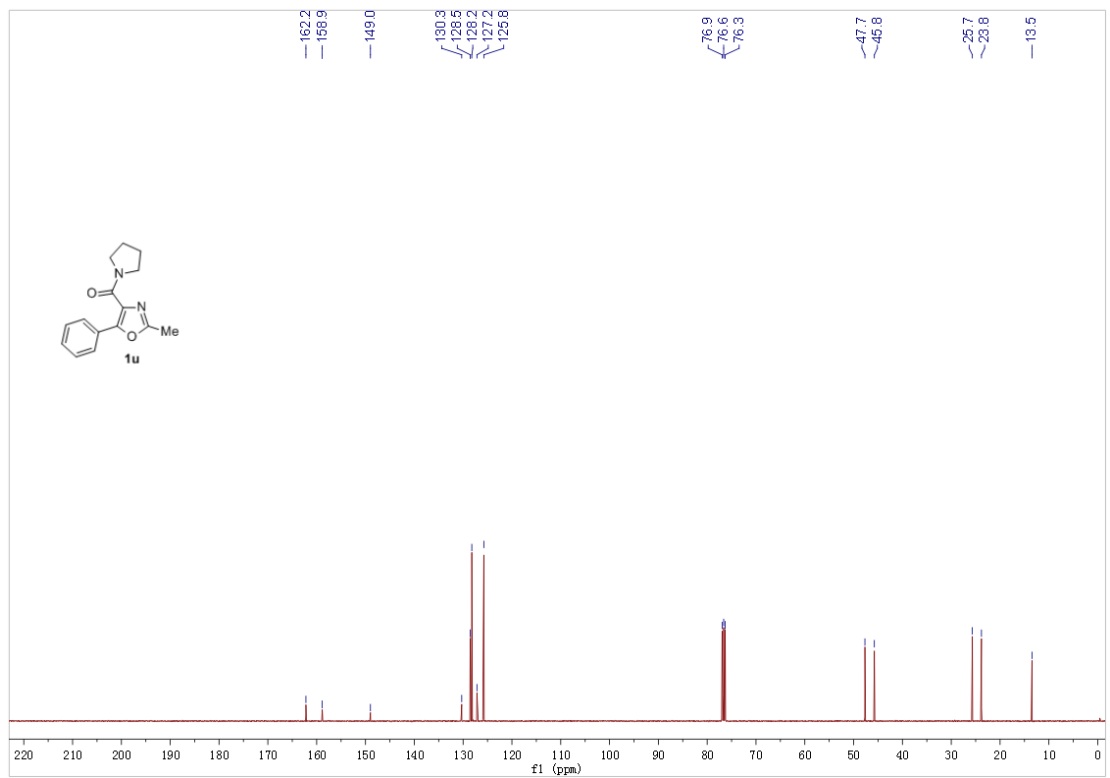

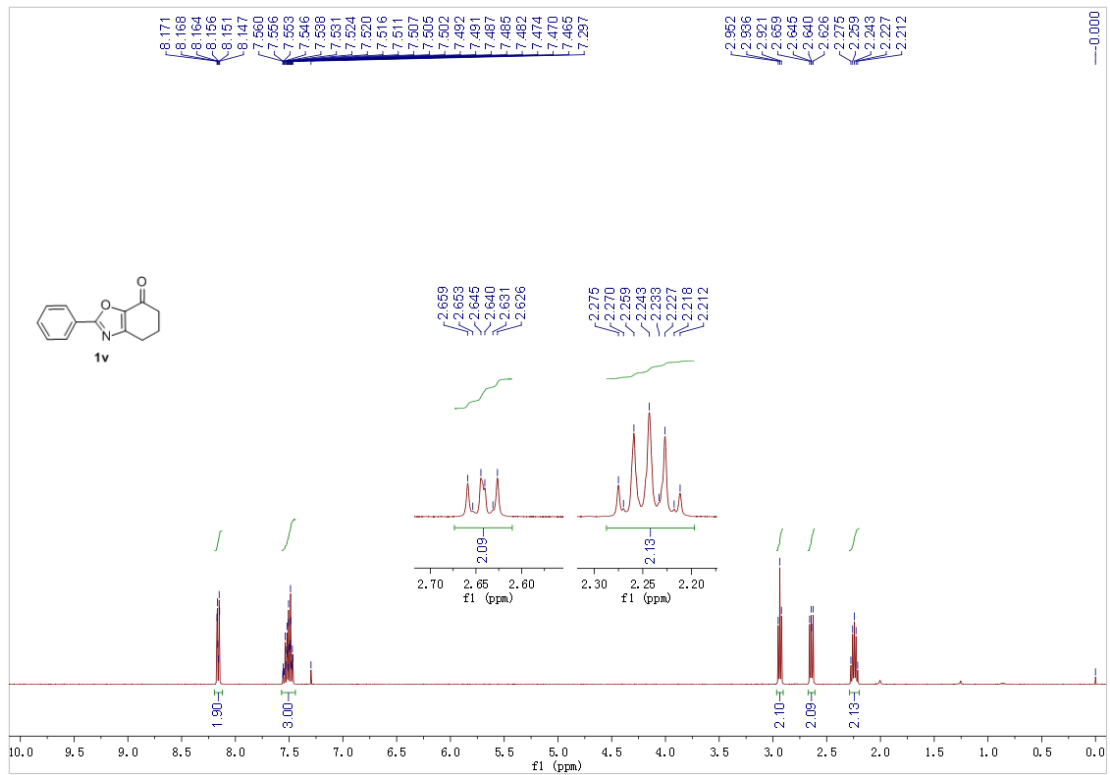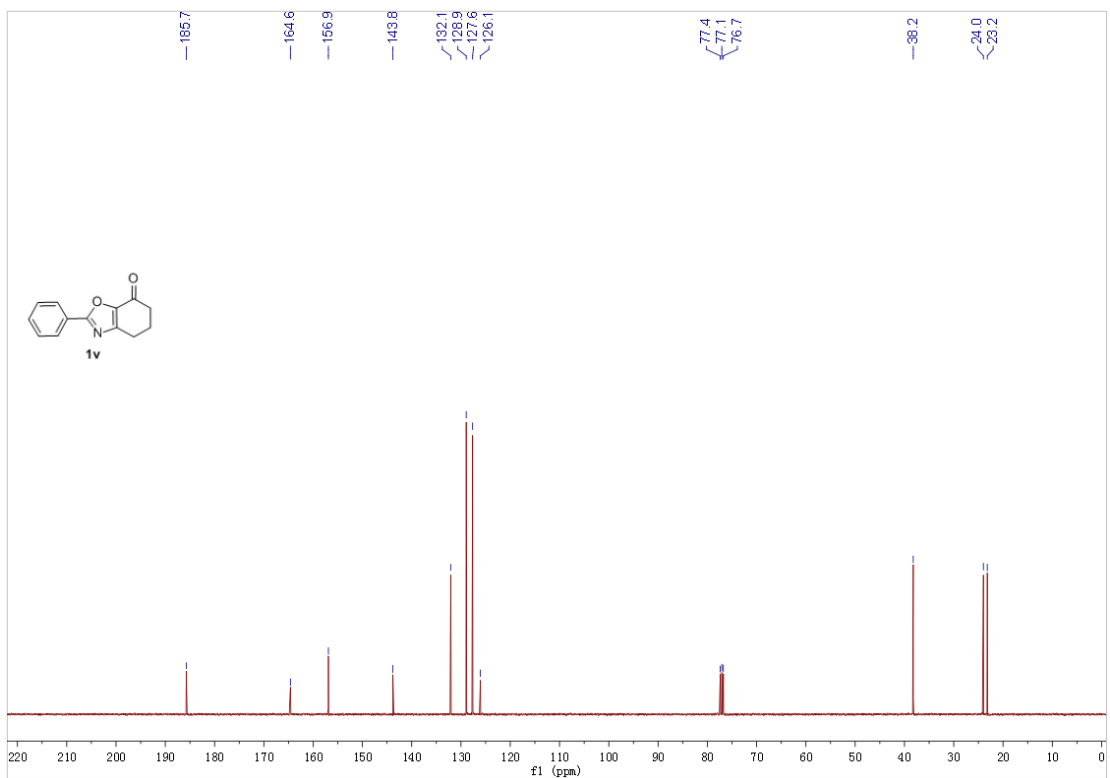

### 3. X-ray structure of oxazole 1g

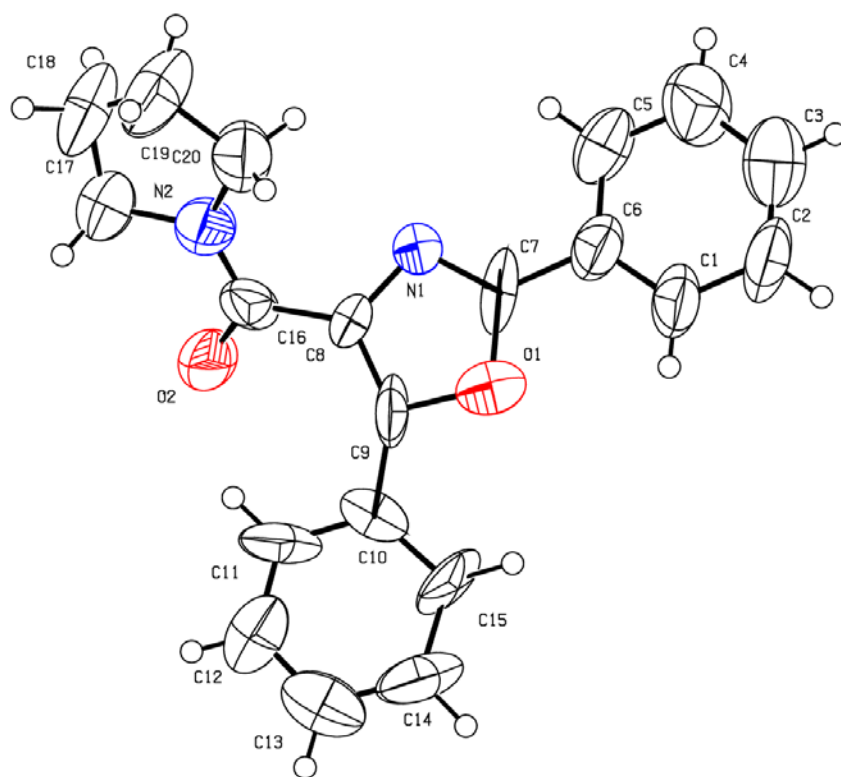

Supplement: c4ob00309h1.pdf [file c4ob00309h1.pdf]
